# Supplementary material
Source: publisher figshare collection journal article supplement (https://acs.figshare.com/ndownloader/files/3762532)

# Supporting Information

## Intramolecularly H-Bonded Aromatic Pentamers as Modularly Tunable Macrocyclic Receptors for Selective Recognition of Metal Ions

Ying Liu,<sup>†,‡</sup> Jie Shen,<sup>‡,‡</sup> Chang Sun,<sup>§,‡</sup> Changliang Ren,<sup>‡</sup> and Huaqiang Zeng<sup>\*,‡</sup>

<sup>†</sup> Prinbury Biopharm. Co., Ltd, 538 Cailun Road, Zhangjiang Hi-Tech Park, Pudong District, Shanghai, 201203, China

<sup>‡</sup> Institute of Bioengineering and Nanotechnology, 31 Biopolis Way, The Nanos, Singapore 138669

<sup>§</sup> College of Textiles and Clothing, Jiangnan University, 1800 Lihu Avenue, Wuxi, Jiangsu, 214122,

<sup>‡</sup>Y.L., J.S. and C.S. contributed equally to the work.

Corresponding Author: hqzeng@ibn.a-star.edu.sg

|                                                                                                                                   |          |
|-----------------------------------------------------------------------------------------------------------------------------------|----------|
| <b>General Remarks</b> .....                                                                                                      | S2-S4    |
| <b>Scheme S1.</b> Synthetic Routes That Affords Pentamers <b>5-20</b> .....                                                       | S5-S12   |
| <b>Synthetic Procedures and Characterizations</b> .....                                                                           | S12-S51  |
| <b>X-ray Crystal Data Sheet for 2, 5, 6 and 14</b> .....                                                                          | S52      |
| <b>Figure S1.</b> Computationally Determined Structures of Trimers ( <b>A</b> ) <sub>3</sub> -( <b>E</b> ) <sub>3</sub> .....     | S61      |
| <b>Figure S2.</b> Computationally Determined Structures of Pentamers ( <b>A</b> ) <sub>5</sub> and( <b>E</b> ) <sub>5</sub> ..... | S62      |
| <b>Figure S3.</b> Possible Groups for incorporation into the Pentameric Framework .....                                           | S63      |
| <b>Figure S4.</b> Optimized Structures of <b>2b</b> •Ba <sup>2+</sup> and ( <b>2b</b> ) <sub>2</sub> •Cs <sup>+</sup> .....       | S64      |
| <b>Table S1.</b> ICP Data for Macrocyclic Hosts <b>2b</b> and <b>6-23</b> .....                                                   | S65      |
| <b>Table S2.</b> ICP Data for Macrocyclic Hosts <b>2b</b> and <b>7-9</b> .....                                                    | S66      |
| <b>Picrate Extraction Experiment</b> for Determination of Binding Constants .....                                                 | S67      |
| <b><sup>1</sup>H NMR, <sup>13</sup>C NMR Spectra and HRMS data for 5-20</b> .....                                                 | S68-S101 |

## General remarks

All the reagents were obtained from commercial suppliers and used as received unless otherwise noted. Aqueous solutions were prepared from distilled water. The organic solutions from all liquid extractions were dried over anhydrous  $\text{Na}_2\text{SO}_4$  for a minimum of 15 minutes before filtration. Reactions were monitored by thin-layer chromatography (TLC) on silica gel pre-coated glass plate (0.225 mm thickness, 60F-254, E. Merck). Flash column chromatography was performed using pre-coated 0.2 mm silica plates from Selecto Scientific. Chemical yields refer to pure isolated substances. Mass spectra were obtained using the Instrumentation includes Finnigan MAT95XL-T and Micromass VG7035.  $^1\text{H}$  NMR spectra were recorded on Bruker ACF300 (300 MHz) and ACF500 (500 MHz) spectrometers. In addition, key compounds were characterized by X-ray Diffraction. The solvent signal of  $\text{CDCl}_3$  was referenced at  $\delta = 7.26$  ppm, and  $\text{DMSO}-d_6$  at 2.50 ppm. Coupling constants ( $J$  values) are reported in Hertz (Hz).  $^1\text{H}$  NMR data are recorded in the order: chemical shift value, multiplicity (s, singlet; d, doublet; t, triplet; q, quartet; m, multiplet; br, broad), number of protons that gave rise to the signal and coupling constant, where applicable.  $^{13}\text{C}$  spectra were proton-decoupled and recorded on Bruker ACF300 (300 MHz) and ACF500 spectrometers (500 MHz). The solvent,  $\text{CDCl}_3$  was referenced at 77 ppm and  $\text{DMSO}-d_6$  at 39.5 ppm.  $\text{CDCl}_3$  (99.8% deuterated) was purchased from Aldrich and used without further purification.

The synthetic procedures for compounds **1a**, **1e**, **1f**, **1g**, **1k** and **7a** can be found from our previous publication (Qin, B. *et al.* Persistently folded circular aromatic amide pentamers containing modularly tunable cation-binding cavities with high ion selectivity. *J. Am. Chem. Soc.* **2010**, *132*, 9564-9566).

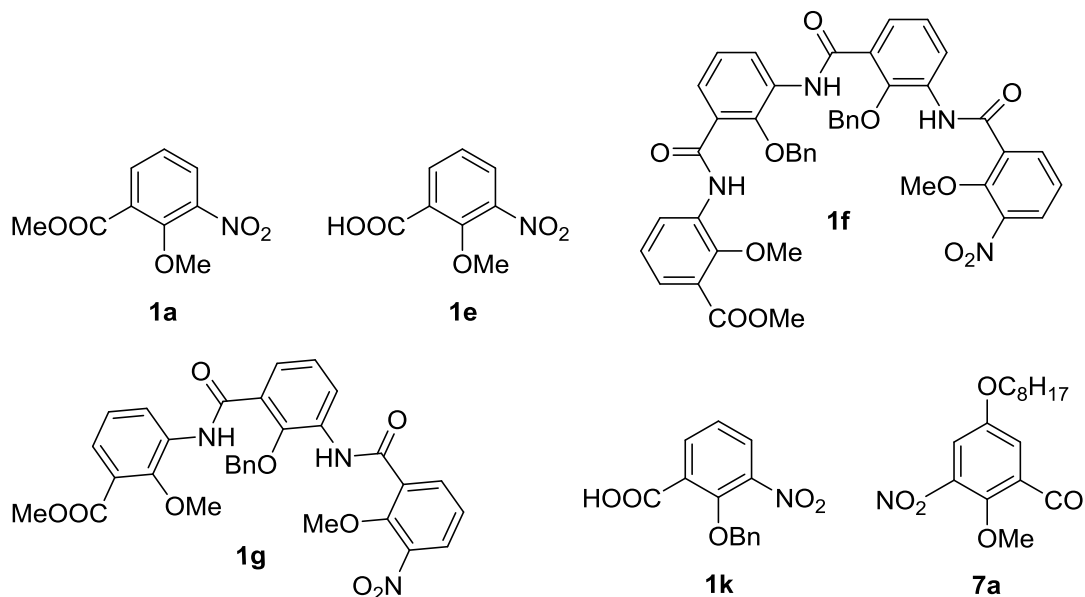

The synthetic procedures for **1b** and **20b** can be found from our previous publication (Ren, C. L. *et al.* Crystallographic realization of the mathematically predicted densest “All Pentamer” packing lattice by C5-symmetric “sticky” fluoropentamers. *Angew. Chem., Int. Ed.* **2011**, *50*, 10612-10615).

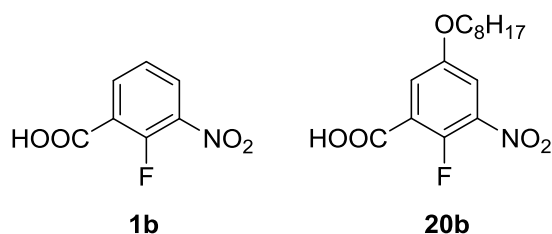

The synthetic procedures for **1i**, **7b**, **10d**, **11f** and **13a** can be found from our previous publication (Ren, C. L. *et al.* Fivefold-symmetric macrocyclic aromatic pentamers: High affinity cation recognition, ion-pair induced columnar stacking and nanofibrillation. *J. Am. Chem. Soc.* **2011**, *133*, 13930-13933).

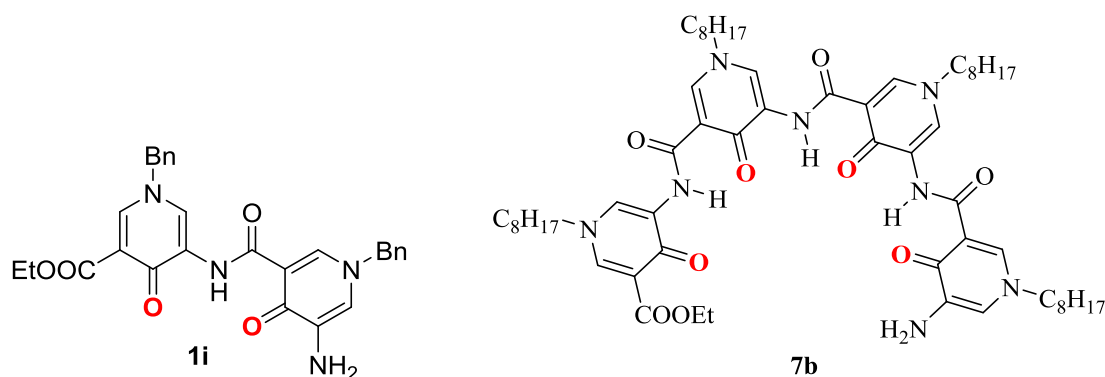

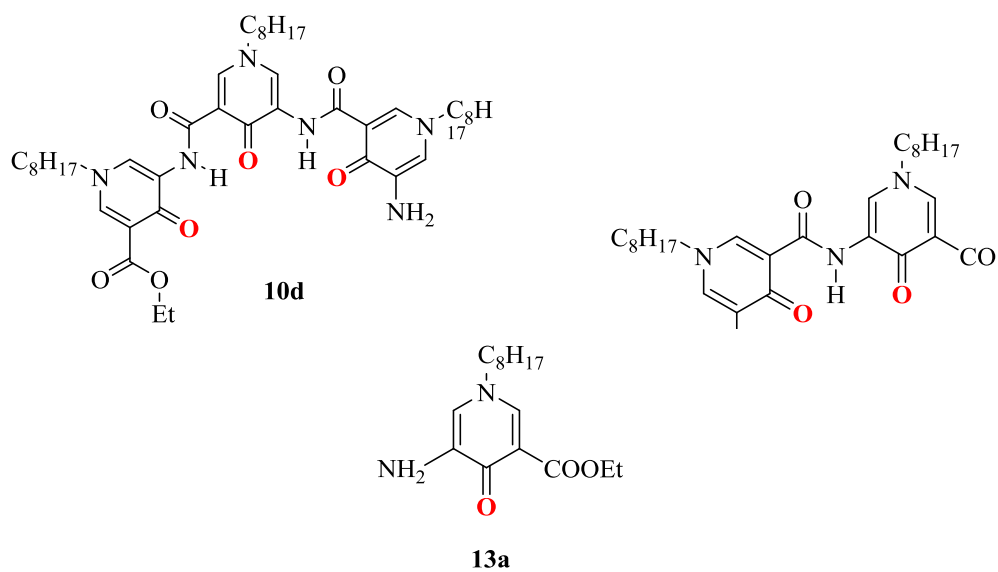

The synthetic procedure of **8a** can be found from our previous publication (Y. Yan et al. Helical Organization in Foldable Aromatic Oligoamides by a Continuous Hydrogen-Bonding Network. *Org. Lett.* **2009**, *11*, 1201-1204).

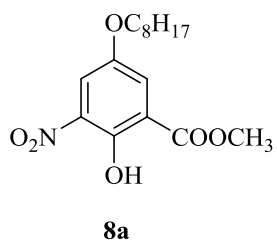

**Scheme S1a: Synthesis of Compound 5d**

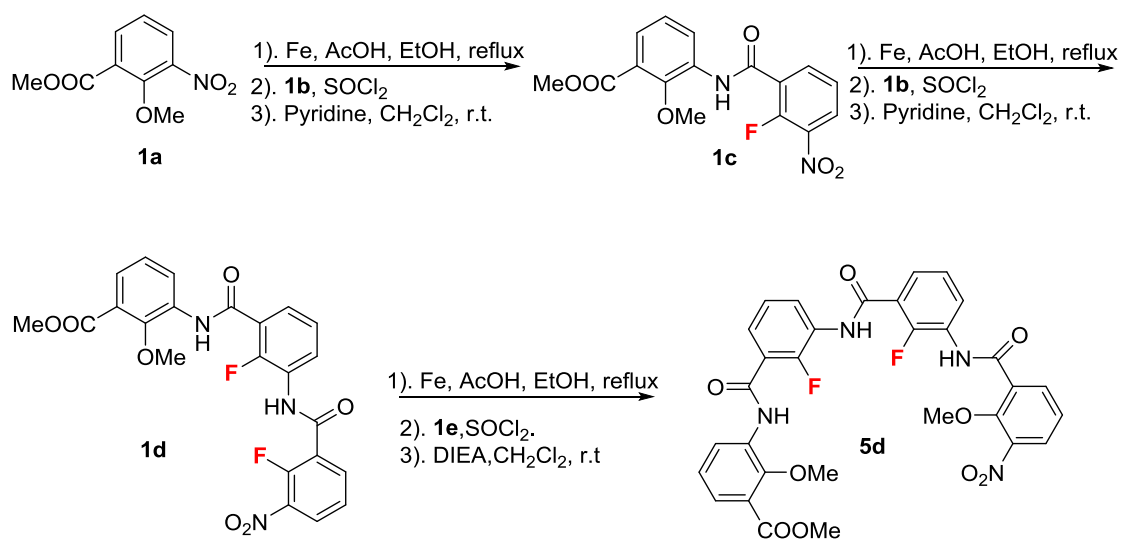

**Scheme S1b: Synthesis of Compound 5e**

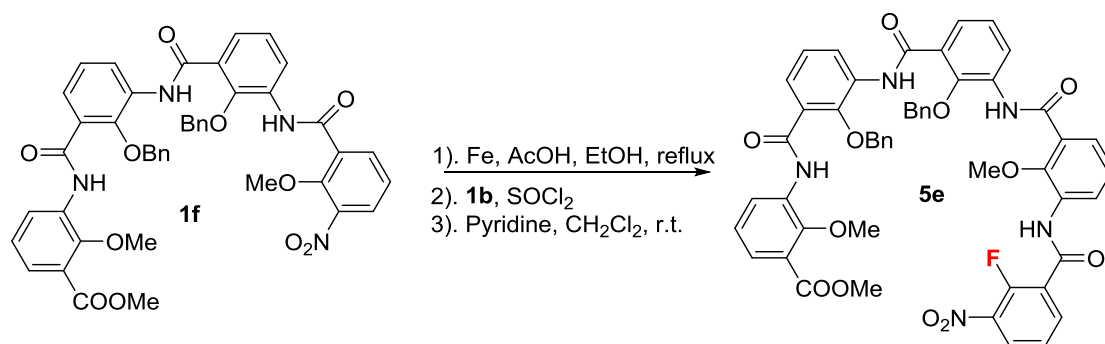

**Scheme S1c: Synthesis of Compound 6a**

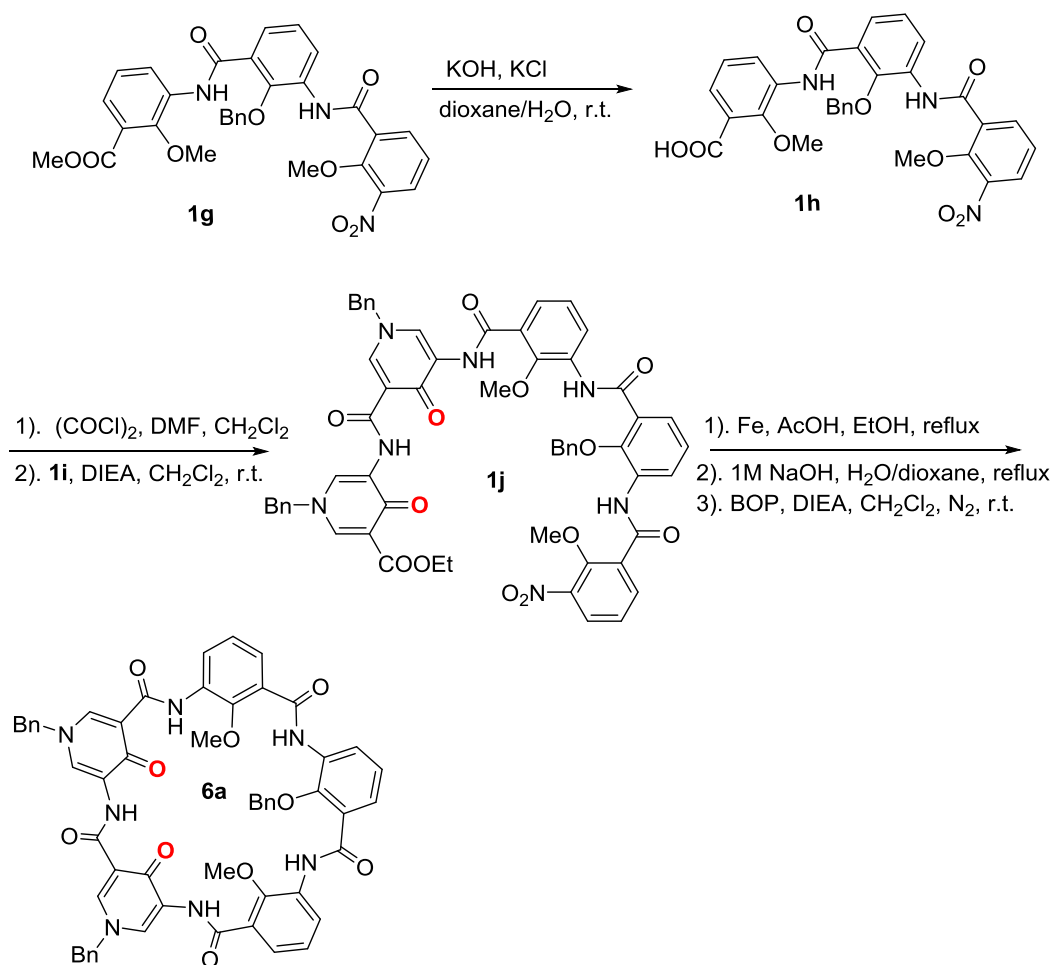

**Scheme S1d: Synthesis of Compound 6b**

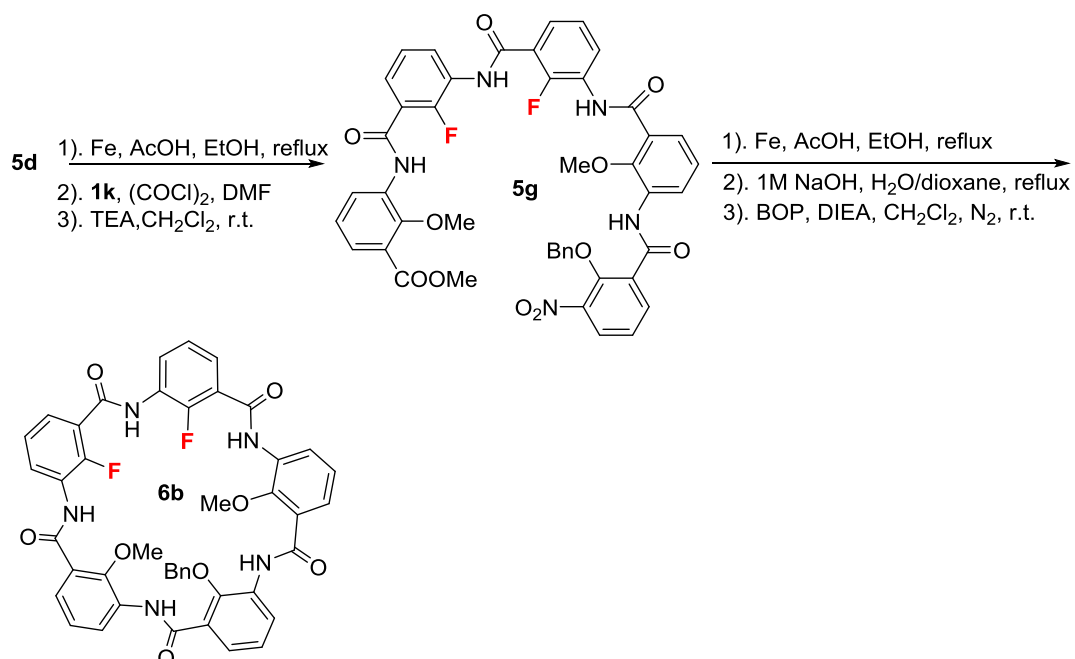

### Scheme S1e: Synthesis of Compounds 7, 8 and 9

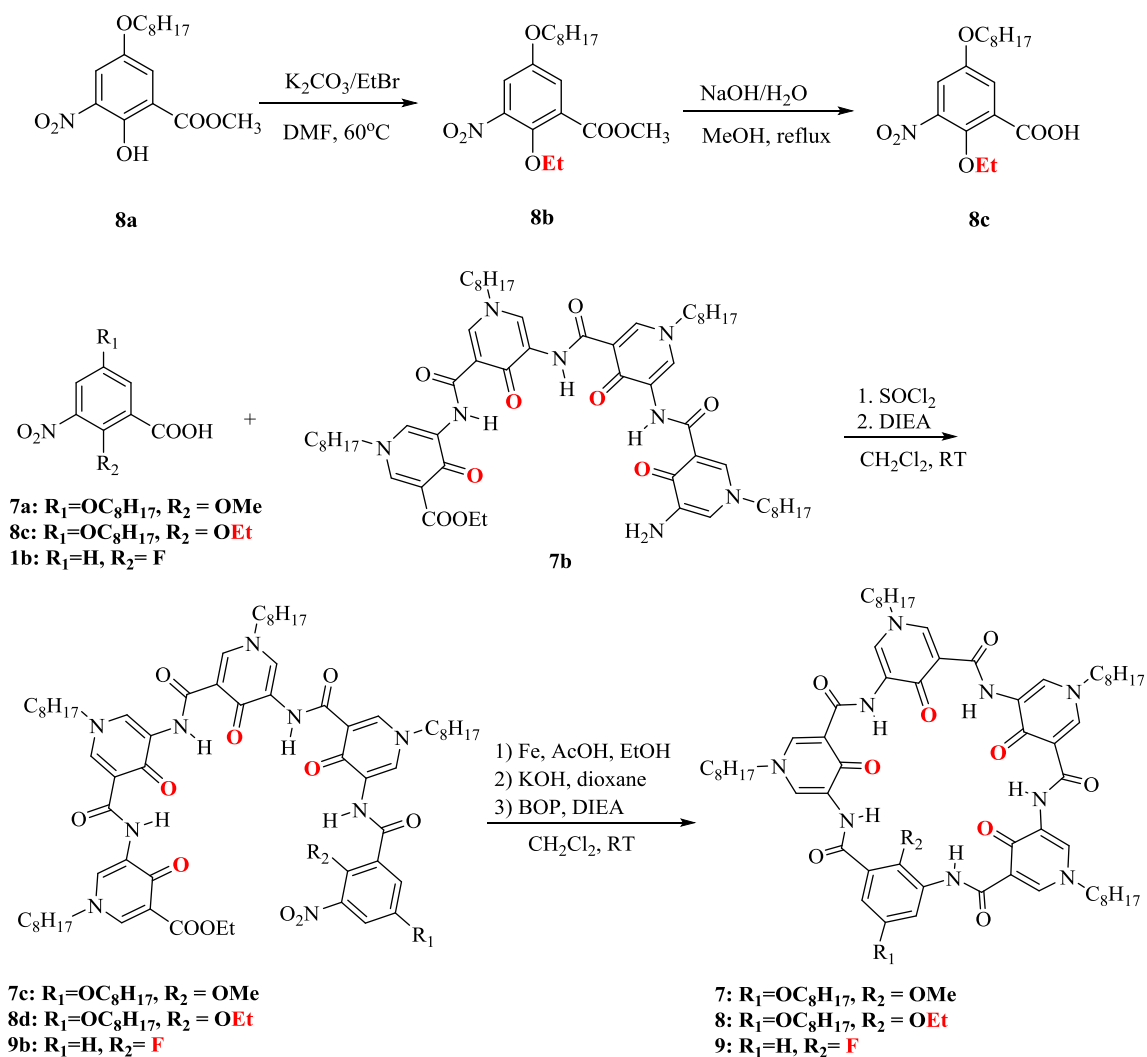

### Scheme S1f: Synthesis of Compound 10

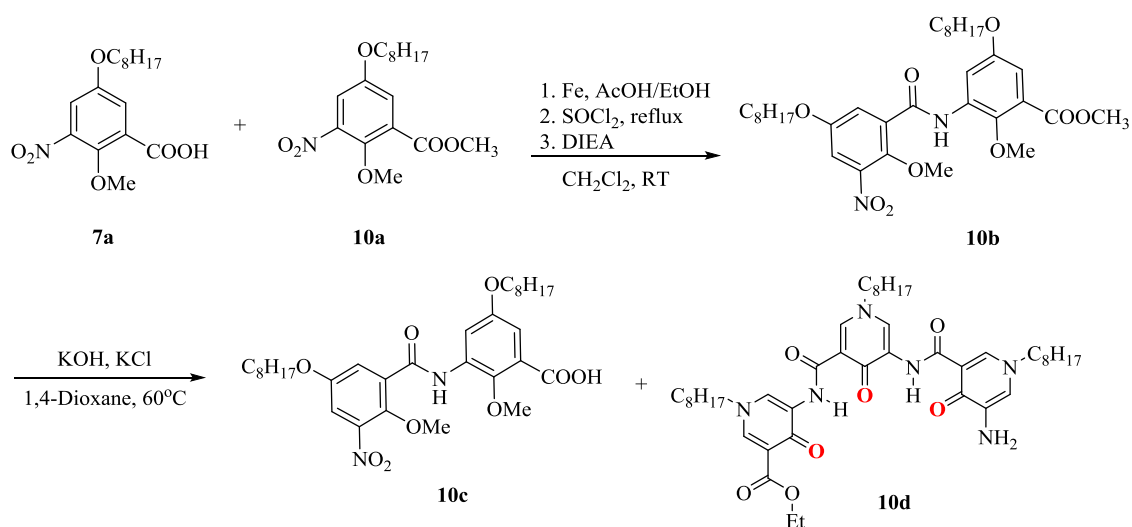

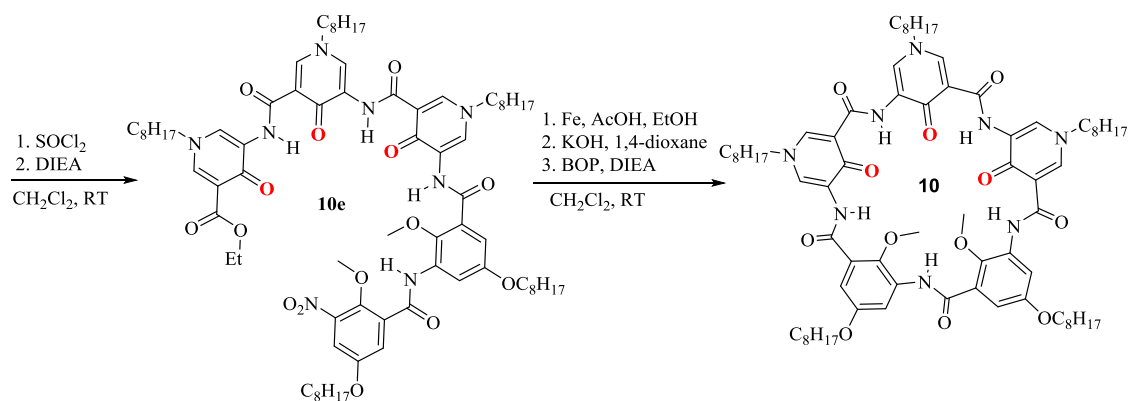

**Scheme S1g: Synthesis of Compound 11**

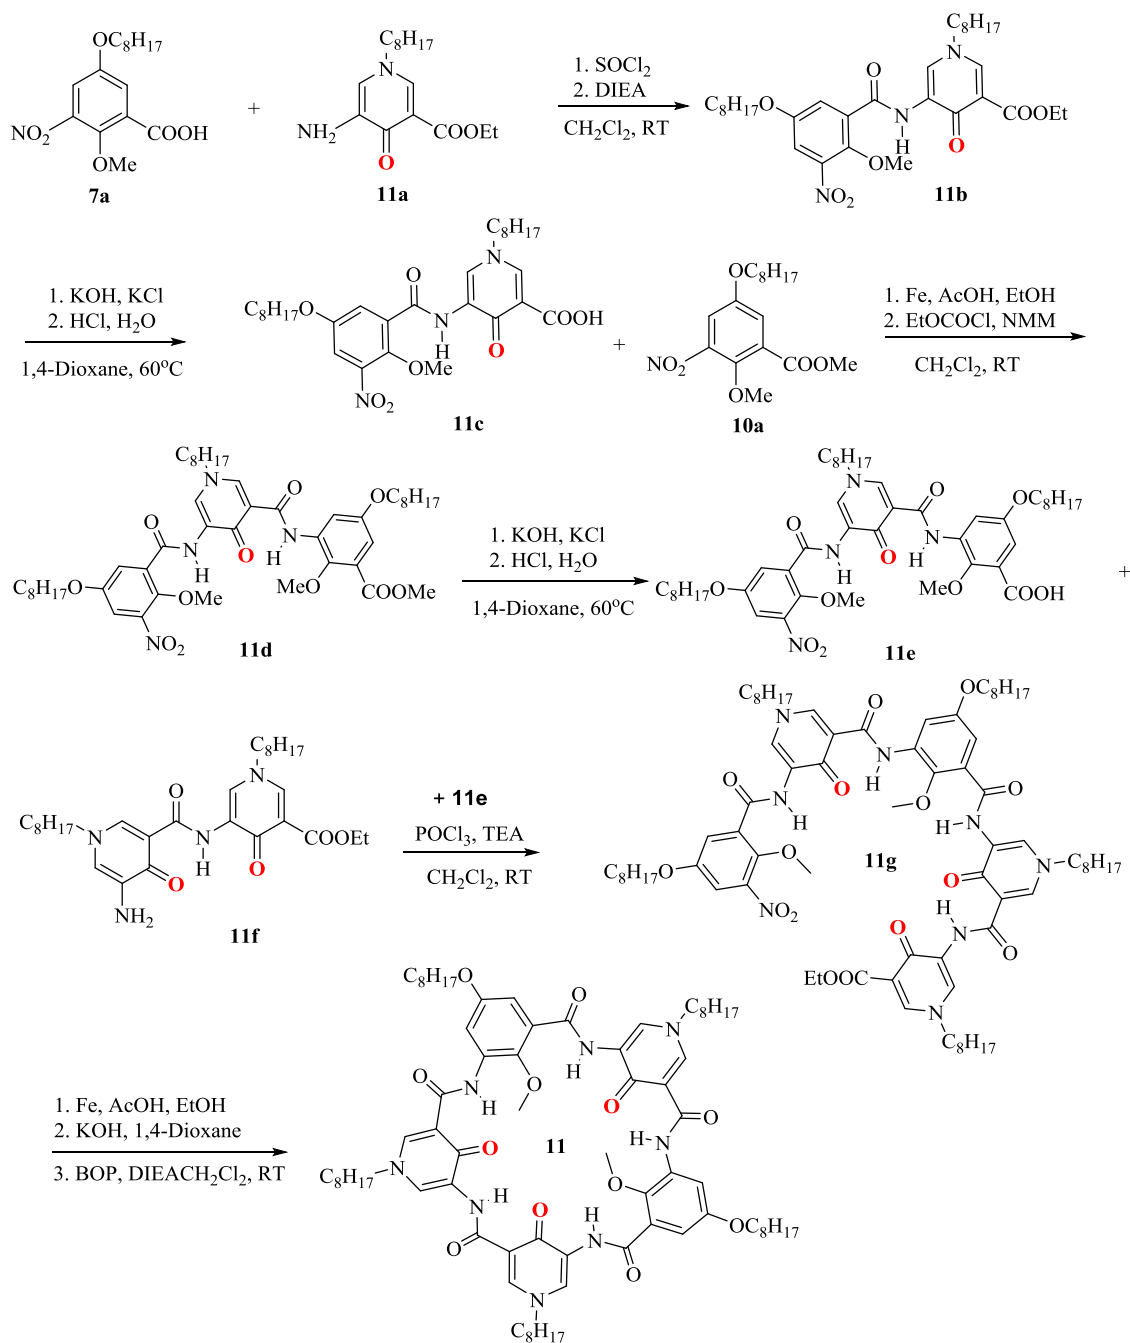



**Scheme S1h: Synthetic Route that Affords Pentamers **12** & **18**.**

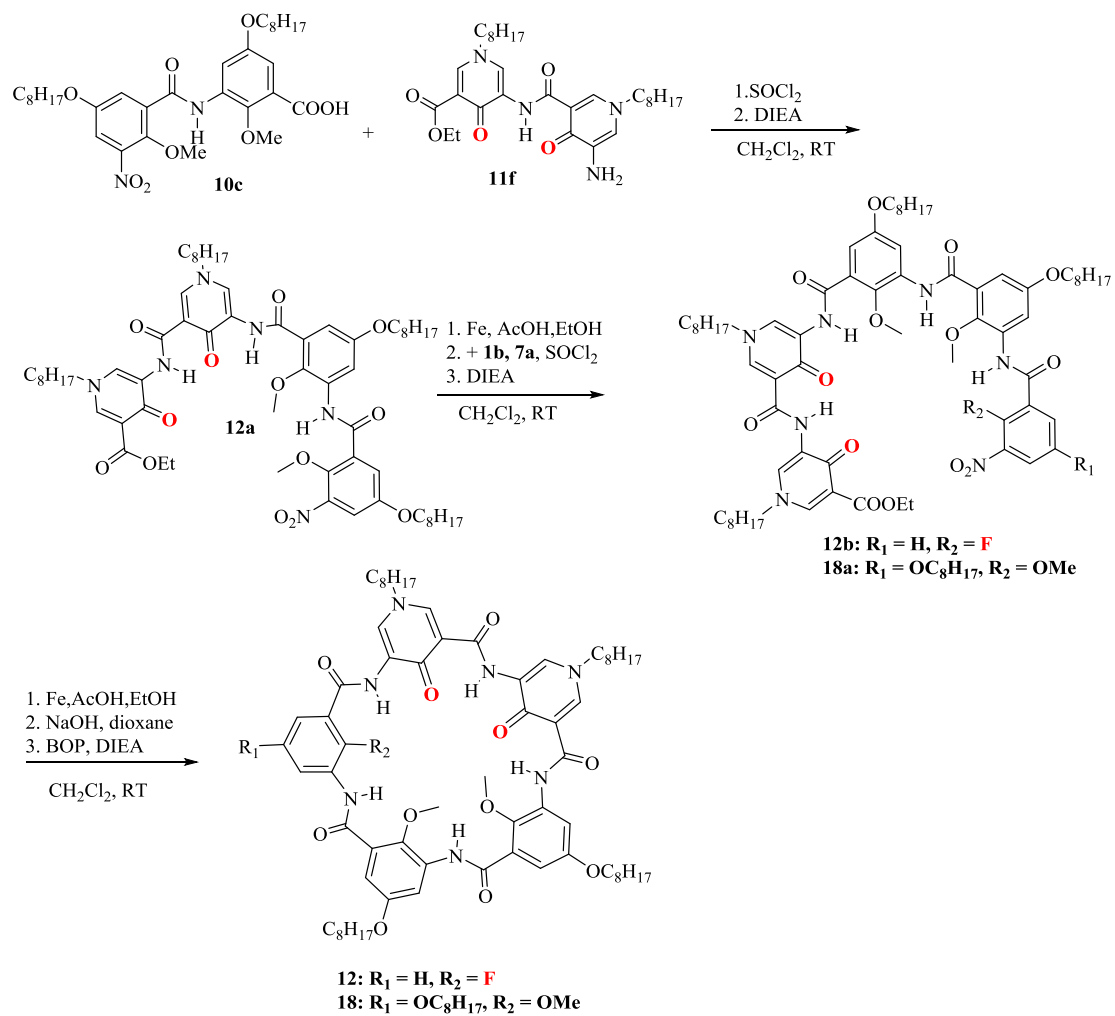

**Scheme S1i: Synthetic Route that Affords Pentamers **13** & **19**.**

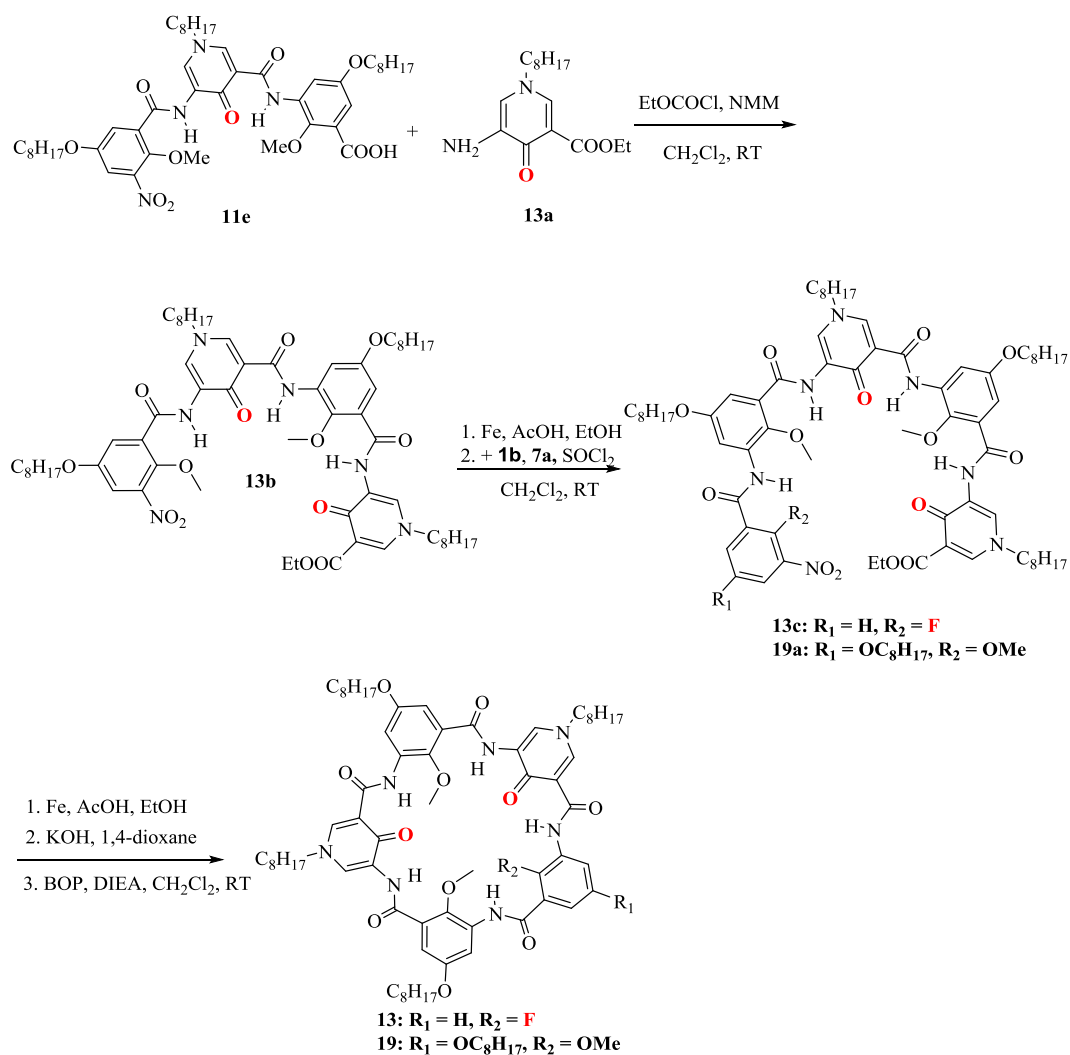

**Scheme S1j: Synthetic Route that Affords Pentamer **14**.**

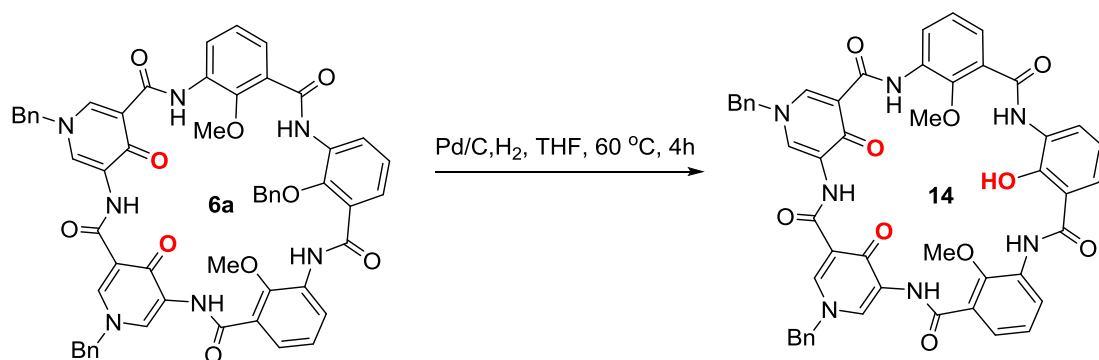

**Scheme S1k:** Synthetic Route that Affords Pentamer **15**.

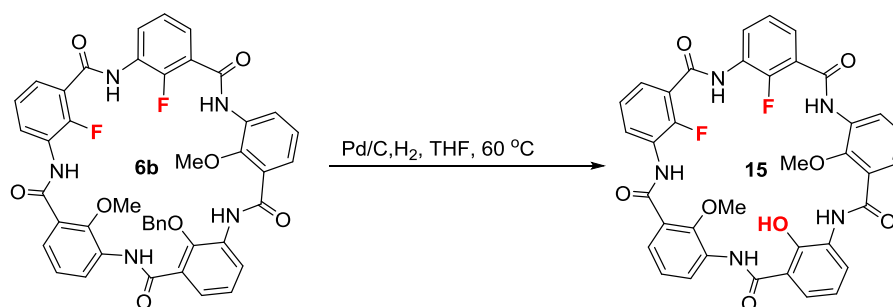

**Scheme S1l:** Synthetic Route that Affords Pentamer **16**.

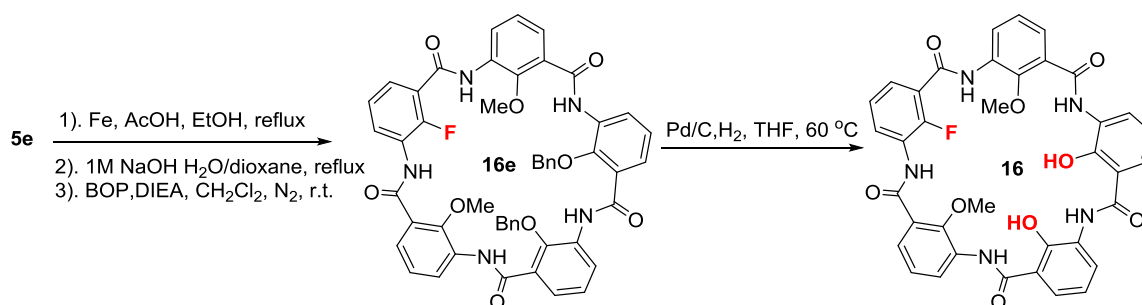

**Scheme S1m:** Synthetic Route that Affords Pentamer **17**.

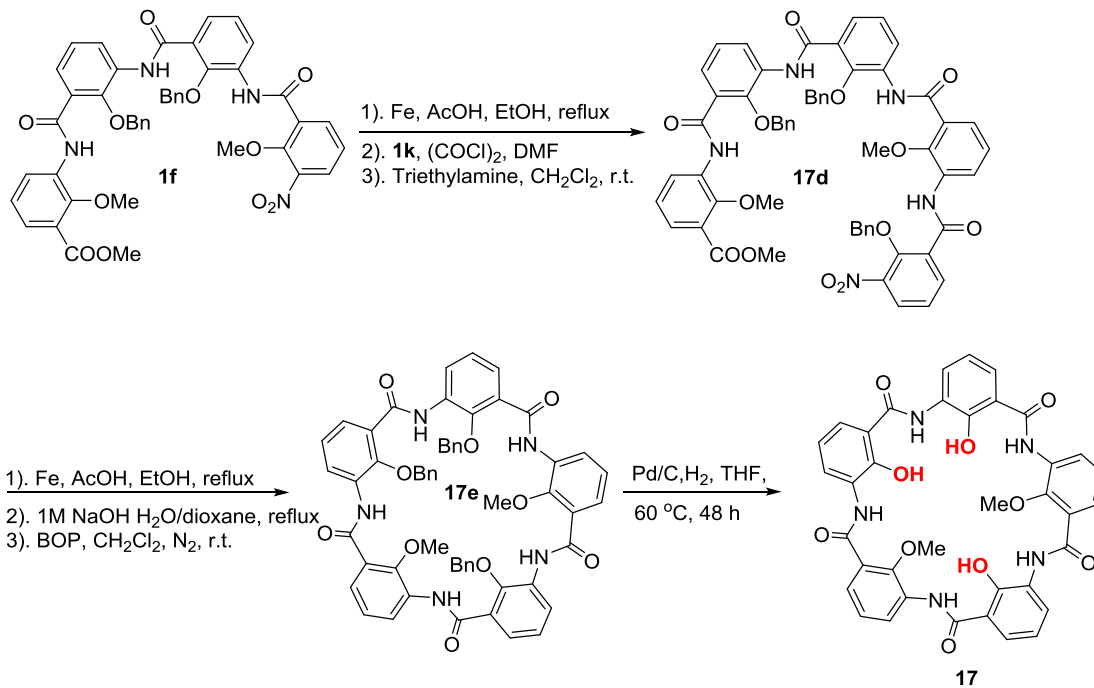

### Scheme S1n: Synthetic Route that Affords Pentamer **20**.

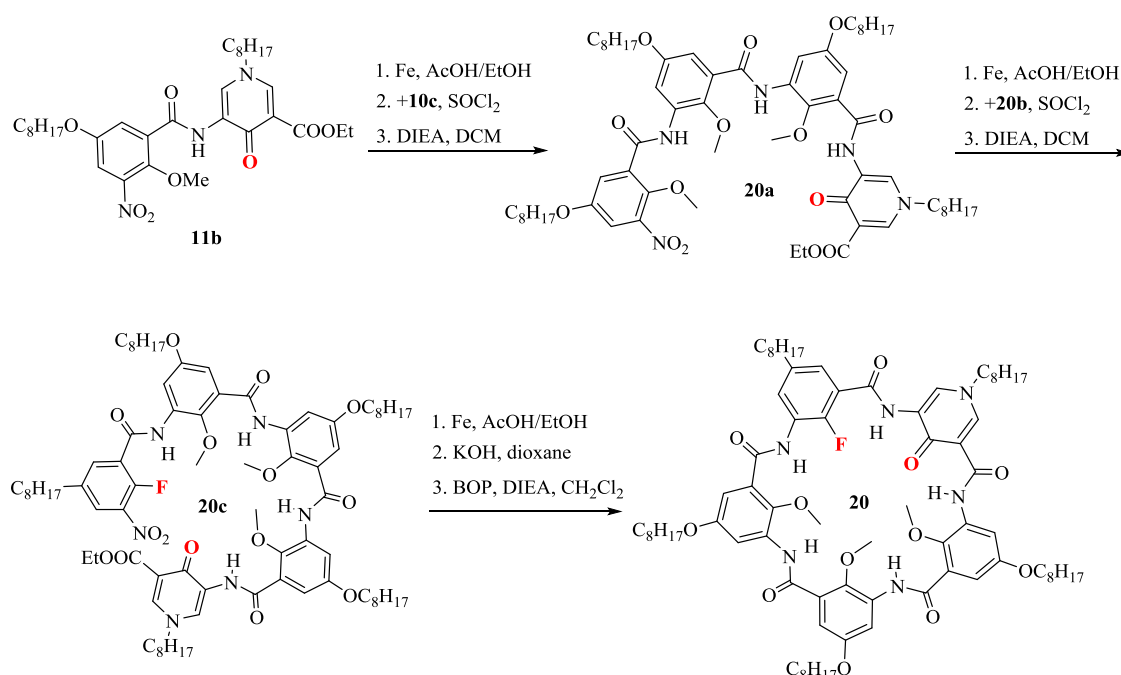

### Synthetic Procedures and Characterizations

#### Methyl 3-(2-fluoro-3-nitrobenzamido)-2-methoxybenzoate (**1c**)

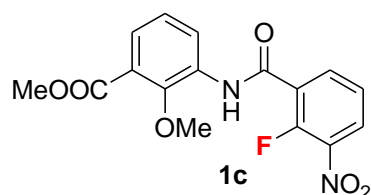

To a solution of **1a** (2.11 g, 10 mmol) and iron (2.24 g, 40 mmol) in EtOH (100 mL) was added acetate acid (10 mL).

The reaction was refluxed for 2 hours at room temperature.

After cooling, the solvent was removed and the residue was dissolved with CH<sub>2</sub>Cl<sub>2</sub> and washed with water and Brine. The organic layer was dried over Na<sub>2</sub>SO<sub>4</sub>. Removal of the solvent gave the amine product used for the next step reaction without further purification. **1b** (2.04 g, 11.0mmol) was dissolved in SOCl<sub>2</sub> (5.5 mL) at room temperature. The reaction mixture was reflux for 2 hours at room temperature, then the excess SOCl<sub>2</sub> was removed in *vacuo* to produce the chloride compound. A solution of amine (1.81 g, 10 mmol) and pyridine (2.0 mL, 25 mmol) in CH<sub>2</sub>Cl<sub>2</sub> (75 mL) was added. The reaction mixture was allowed to stir continuously overnight at room temperature. The reaction mixture was washed with 1 M HCl (50 mL), followed by saturated NaCl (100 mL). Drying over

Na<sub>2</sub>SO<sub>4</sub> and removal of solvent in *vacuo* gave the crude product, which was recrystallized from methanol to give the pure product **1c** as a white solid. Yield: 2.96 g, 85%. <sup>1</sup>H NMR (500 MHz, CDCl<sub>3</sub>): δ 9.25 (d, 1H, *J* = 12.7 Hz), 8.71 (d, 1H, *J* = 8.2 Hz), 8.45 (td, 1H, *J* = 9, 1.5 Hz), 8.22 (td, 1H, *J* = 9, 1.5 Hz), 7.65 (dd, 1H, *J* = 7.9, 1.5 Hz), 7.49 (t, 1H, *J* = 8.0 Hz), 7.22 (t, 1H, *J* = 8.1 Hz), 3.97 (s, 3H), 3.95 (s, 3H). <sup>13</sup>C NMR (126 MHz, CDCl<sub>3</sub>): δ 165.70, 159.23, 154.25, 152.10, 149.42, 137.54, 132.22, 129.45, 127.00, 125.07, 125.01, 124.56, 124.32, 123.55, 62.63, 52.37. MS-ESI: calculated for [M]<sup>+</sup> (C<sub>16</sub>H<sub>12</sub>FN<sub>2</sub>O<sub>6</sub>): *m/z* 347.0685, found: *m/z* 347.0680.

**Methyl 3-(2-fluoro-3-(2-fluoro-3-nitrobenzamido)benzamido)-2-methoxybenzoate (1d)**

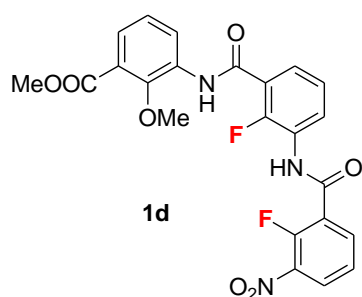

To a solution of **1c** (0.7 g, 2 mmol) and iron (0.45 g, 8 mmol) in EtOH (20 mL) was added acetate acid (2 mL). The reaction was refluxed for 2 hours at room temperature. After cooling, the solvent was removed and the residue was dissolved with CH<sub>2</sub>Cl<sub>2</sub> and washed with water and Brine.

The organic layer was dried over Na<sub>2</sub>SO<sub>4</sub>. Removal of the solvent gave the amine product used for the next step reaction without further purification. **1b** (0.41 g, 2.2mmol) was dissolved in SOCl<sub>2</sub> (2 mL) at room temperature. The reaction mixture was reflux for 2 hours at room temperature, then the excess SOCl<sub>2</sub> was removed in *vacuo* to produce the chloride compound. A solution of amine (0.64 g, 2 mmol) and pyridine (0.4 mL, 5 mmol) in CH<sub>2</sub>Cl<sub>2</sub> (20 mL) was added. The reaction mixture was allowed to stir continuously overnight at room temperature. The reaction mixture was washed with 1 M HCl (10 mL), followed by saturated NaCl (20 mL). Drying over Na<sub>2</sub>SO<sub>4</sub> and removal of solvent in *vacuo* gave the crude product, which was recrystallized from methanol to give the pure product **1d** as a white solid. Yield: 0.65 g, 67%. <sup>1</sup>H NMR (500 MHz, CDCl<sub>3</sub>): δ 9.20 (d, 1H, *J* = 13.1 Hz), 8.73 (dd, 1H, *J* = 8.1, 1.1 Hz), 8.69 (d, 1H, *J* = 12.6 Hz), 8.58 (t, 1H, *J* = 7.3 Hz), 8.50 – 8.40 (m, 1H), 8.31 – 8.20 (m, 1H), 7.93 (td, 1H, *J* = 7.8, 1.4 Hz), 7.62 (dd, 1H, *J* = 7.9, 1.5 Hz), 7.51 (t, 1H, *J* = 8.0 Hz), 7.38 (t, 1H, *J* = 8.0 Hz), 7.21 (t, 1H, *J* = 8.0 Hz), 3.95 (s, 3H), 3.94 (s, 3H). <sup>13</sup>C NMR (126 MHz, CDCl<sub>3</sub>): δ 165.88, 160.64, 159.47, 154.22, 152.10, 149.16, 137.49,

132.43, 129.82, 127.46, 126.59, 126.39, 126.12, 125.35, 125.31, 125.23, 125.17, 124.62, 124.36, 123.79, 123.47, 62.55, 52.35. MS-ESI: calculated for  $[M]^-$  ( $C_{23}H_{16}F_2N_3O_7$ ):  $m/z$  484.0950, found:  $m/z$  484.0958.

**Methyl 3-(2-fluoro-3-(2-fluoro-3-(2-methoxy-3-nitrobenzamido)benzamido)benz amido)-2-methoxybenzoate (5d)**

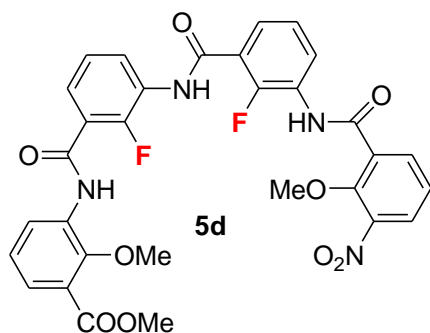

To a solution of **1d** (0.97 g, 2 mmol) and iron (0.45 g, 8 mmol) in EtOH/THF (20 mL/10 mL) was added acetate acid (2 mL). The reaction was refluxed for 2 hours at room temperature. After cooling, the solvent was removed and the residue was dissolved with  $CH_2Cl_2$  and washed with water and Brine. The organic

layer was dried over  $Na_2SO_4$ . Removal of the solvent gave the amine product used for the next step reaction without further purification. Compound **1e** (0.43 g, 2.2mmol) was dissolved in  $SOCl_2$  (2 mL) at room temperature. The reaction mixture was reflux for 2 hours at room temperature, then the excess  $SOCl_2$  was removed in *vacuo* to produce the chloride compound. A solution of amine (0.91 g, 2 mmol) and DIEA (0.81 mL, 5 mmol) in  $CH_2Cl_2$  (20 mL) was added. The reaction mixture was allowed to stir continuously overnight at room temperature. The reaction mixture was washed with 1 M HCl (10 mL), followed by saturated NaCl (20 mL). Drying over  $Na_2SO_4$  and removal of solvent in *vacuo* gave the crude product, which was recrystallized from methanol to give the pure product **5d** as a white solid. Yield: 0.89 g, 70%.  $^1H$  NMR (500 MHz,  $CDCl_3$ ):  $\delta$  9.97 (s, 1H), 9.17 (d, 1H,  $J = 12.8$  Hz), 8.74 (d, 1H,  $J = 8.1$  Hz), 8.71 – 8.67 (m, 1H), 8.67 – 8.62 (m, 2H), 8.44 (dd, 1H,  $J = 7.9, 1.7$  Hz), 8.03 (dd, 1H,  $J = 8.0, 1.7$  Hz), 7.89 (t, 2H,  $J = 7.4$  Hz), 7.62 (dd, 1H,  $J = 7.9, 1.5$  Hz), 7.44 (t, 1H,  $J = 8.0$  Hz), 7.38 (dt, 2H,  $J = 10.9, 8.1$  Hz), 7.22 (t, 1H,  $J = 8.0$  Hz), 4.14 (s, 3H), 3.94 (s, 6H).  $^{13}C$  NMR (126 MHz,  $CDCl_3$ ):  $\delta$  165.81, 161.54, 161.06, 160.85, 151.41, 149.27, 144.31, 136.58, 132.59, 129.24, 128.51, 126.82, 126.74, 126.68, 126.60, 126.51, 126.24, 125.51, 125.48, 125.33, 125.29, 125.13, 124.74, 124.41, 123.52, 121.71, 121.62, 121.24, 121.15, 64.49, 62.50, 52.37. MS-ESI: calculated for  $[M]^-$  ( $C_{31}H_{23}F_2N_3O_9$ ):  $m/z$  633.1439, found:  $m/z$  633.1446.

**Methyl 3-(2-(benzyloxy)-3-(2-(benzyloxy)-3-(3-(2-fluoro-3-nitrobenzamido)-2-methoxybenzamido)benzamido)benzamido)-2-methoxybenzoate (5e)**

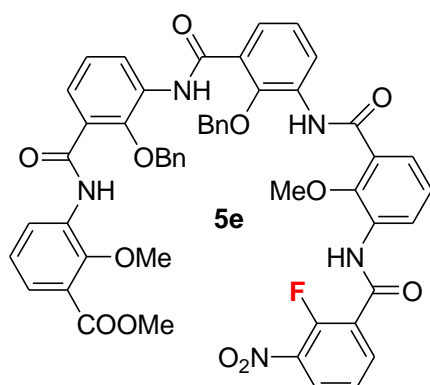

To a solution of **1f** (1.62 g, 2 mmol) and iron (0.45 g, 8 mmol) in EtOH/THF (20 mL/10 mL) was added acetate acid (2 mL). The reaction was refluxed for 2 hours at room temperature. After cooling, the solvent was removed and the residue was dissolved in CH<sub>2</sub>Cl<sub>2</sub> and washed with water and Brine. The organic layer was dried over Na<sub>2</sub>SO<sub>4</sub>. Removal of the solvent gave

the amine product used for the next step reaction without further purification. **1b** (0.41 g, 2.2mmol) was dissolved in SOCl<sub>2</sub> (2 mL) at room temperature. The reaction mixture was reflux for 2 hours at room temperature, then the excess SOCl<sub>2</sub> was removed in *vacuo* to produce the chloride compound. A solution of amine (0.64 g, 2 mmol) and pyridine (0.4 mL, 5 mmol) in CH<sub>2</sub>Cl<sub>2</sub> (20 mL) was added. The reaction mixture was allowed to stir continuously overnight at room temperature. The reaction mixture was washed with 1 M HCl (10 mL), followed by saturated NaCl (20 mL). Drying over Na<sub>2</sub>SO<sub>4</sub> and removal of solvent in *vacuo* gave the crude product, which was recrystallized from methanol to give the pure product **5e** as a white solid. Yield: 1.0 g, 54%. <sup>1</sup>H NMR (500 MHz, CDCl<sub>3</sub>): δ 9.85 (s, 1H), 9.68 (s, 1H), 9.33 (s, 1H), 8.93 (d, 1H, *J* = 12.9 Hz), 8.78 (d, 1H, *J* = 8.1 Hz), 8.74 (d, 1H, *J* = 8.1 Hz), 8.67 (t, 2H, *J* = 7.2 Hz), 8.50 (t, 1H, *J* = 7.1 Hz), 8.25 (t, 1H, *J* = 7.5 Hz), 7.82 (t, 2H, *J* = 6.8 Hz), 7.63 (d, 1H, *J* = 7.8 Hz), 7.58 (d, 1H, *J* = 7.8 Hz), 7.54 (t, 1H, *J* = 8.0 Hz), 7.41 – 7.29 (m, 3H), 7.21 – 7.18 (m, 3H), 7.12 – 7.06 (m, 5H), 6.99 – 6.93 (m, 3H), 4.92 (s, 2H), 4.88 (s, 2H), 3.87 (s, 3H), 3.74 (s, 3H), 3.66 (s, 3H). <sup>13</sup>C NMR (126 MHz, CDCl<sub>3</sub>): δ 165.93, 163.56, 163.49, 162.96, 159.35, 154.15, 152.07, 149.38, 147.32, 146.06, 145.83, 138.25, 137.69, 134.80, 134.59, 132.80, 132.50, 132.45, 131.29, 129.71, 128.99, 128.94, 128.91, 128.67, 128.56, 128.41, 127.79, 127.57, 127.16, 126.72, 126.26, 125.94, 125.71, 125.68, 125.59, 125.36, 125.32, 125.11, 124.73, 124.61, 124.48, 124.20, 124.05, 123.38, 78.85, 78.79, 62.79, 62.19, 52.20. HRMS-ESI: calculated for [M]<sup>+</sup> (C<sub>52</sub>H<sub>42</sub>FN<sub>5</sub>O<sub>12</sub>): *m/z* 946.2741, found: *m/z* 946.2711.

**Ethyl 1-benzyl-5-(1-benzyl-5-(3-(2-(benzyloxy)-3-(2-methoxy-3-nitrobenzamido)benzamido)-2-methoxybenzamido)-4-oxo-1,4-dihydropyridine-3-carboxamido)-4-oxo-1,4-dihydropyridine-3-carboxylate (1j)**

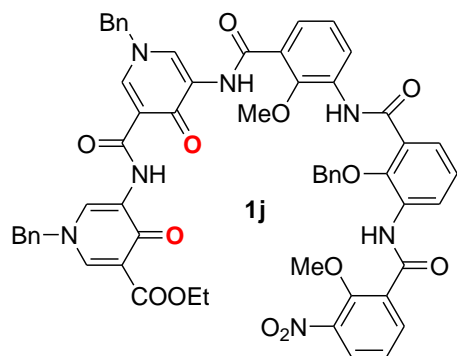

Compound **1g** (1.35 g, 2.3 mmol) was dissolved in dioxane and H<sub>2</sub>O (100 mL, v/v 1/1) mixed solution to which 1 M KOH (4.6 mL) and KCl (3.4 g, 46 mmol) were added. The reaction was stirred at room temperature for 12 hours at room temperature, then 1 M HCl was added to neutralize the mixture to pH 3. The mixture was extracted with CH<sub>2</sub>Cl<sub>2</sub> three times

(3 x 100 mL). The organic extracts were dried over Na<sub>2</sub>SO<sub>4</sub> and concentrated under reduced pressure to produce the acid product **1h**. The acid (131 mg, 0.23 mmol) was dissolved in SOCl<sub>2</sub> (2 mL) and stirred for 2 hours at room temperature, under reflux. Then the excess SOCl<sub>2</sub> was removed in *vacuo* to produce the chloride product. To the solution of chloride product in dry CH<sub>2</sub>Cl<sub>2</sub> were added **1i** and DIEA (0.16 mL, 0.93 mmol). The reaction was allowed to proceed for 12 hours at room temperature. After washing with HCl solution, aqueous sat. NaHCO<sub>3</sub> and Brine, the organic layer was dried over Na<sub>2</sub>SO<sub>4</sub>. The residue was recrystallized from methanol to give the pure product **1j** as a white solid. Yield: 162 mg, 67%. <sup>1</sup>H NMR (500 MHz, CDCl<sub>3</sub>): δ 12.70 (s, 1H), 10.88 (s, 1H), 10.11 (s, 1H), 9.45 (s, 1H), 9.08 (s, 1H), 8.95 (s, 1H), 8.74 (d, 1H, *J* = 7.8 Hz), 8.69 (d, 1H, *J* = 7.8 Hz), 8.43 (s, 1H), 8.28 (d, 1H, *J* = 7.6 Hz), 8.18 (s, 1H), 7.93 (d, 1H, *J* = 8.0 Hz), 7.79 (d, 1H, *J* = 7.8 Hz), 7.73 (d, *J* = 7.5 Hz, 1H), 7.45 – 6.98 (m, 18H), 5.12 (s, 2H), 5.07 (s, 2H), 5.02 (s, 2H), 4.23 (q, 2H, *J* = 6.8 Hz), 4.01 (s, 3H), 3.80 (s, 3H), 1.25 (t, 1H, *J* = 6.9 Hz). <sup>13</sup>C NMR (126 MHz, CDCl<sub>3</sub>): δ 168.83, 167.81, 164.94, 164.22, 163.43, 162.97, 161.61, 151.59, 148.05, 145.96, 144.21, 142.63, 141.23, 135.99, 134.52, 134.24, 133.96, 133.54, 132.65, 132.46, 132.35, 129.51, 129.40, 129.34, 129.13, 129.05, 128.58, 128.55, 128.43, 127.75, 127.51, 127.17, 127.04, 126.00, 125.80, 125.58, 125.35, 125.25, 125.16, 124.33, 115.78, 115.08, 79.10, 64.53, 62.90, 62.36, 61.77, 60.85, 14.34. HRMS-ESI: calculated for [M]<sup>+</sup> (C<sub>58</sub>H<sub>50</sub>N<sub>7</sub>O<sub>13</sub>)<sup>+</sup>: *m/z* 1052.3461, found: *m/z* 1052.3507.



### Pentamer 6a

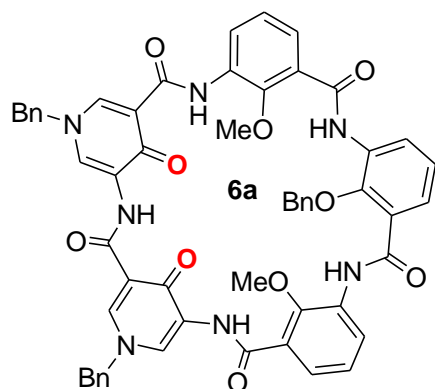

To a solution of **1j** (523 mg, 0.50 mmol) and iron (112 mg, 2.0 mmol) in EtOH/THF (5 mL/2 mL) was added acetate acid (1.0 mL). The reaction was refluxed for 3 hours. After cooling, the solvent was removed and the residue was dissolved with CH<sub>2</sub>Cl<sub>2</sub> and washed with water and Brine. The organic layer was dried over Na<sub>2</sub>SO<sub>4</sub>. After removal of the solvent, the residue was

not purified, but used directly in the next step. To the solution of residue in hot dioxane (1.5 mL) was added 1M KOH (1.0 mL). The reaction was heated under reflux for 4 hours. After quenching with water (15 mL), the aqueous layer was neutralized by addition of 1M HCl (1.5 mL). The mixture was extracted with CHCl<sub>3</sub> (3x15 mL). The organic extracts were dried over Na<sub>2</sub>SO<sub>4</sub> and concentrated under reduced pressure. To the solution of the residue in dry CH<sub>2</sub>Cl<sub>2</sub> (10 mL) was added BOP (0.55 g, 2.5 mmol) and DIEA (0.25 mL). The reaction was stirred in room temperature for 6 hours. The reaction was washed with HCl solution, aqueous sat. NaHCO<sub>3</sub> and Brine. After removal of the solvent, the residue was purified by flash column chromatography on silica gel using CH<sub>2</sub>Cl<sub>2</sub>/ethyl acetate (20/1 v/v) as the eluent to give the product **6a**, three-step total yield: 170 mg, 35%. <sup>1</sup>H NMR (500 MHz, CDCl<sub>3</sub>): δ 13.59 (s, 1H), 13.47 (s, 1H), 11.46 (s, 1H), 11.15 (s, 1H), 10.88 (s, 1H), 9.12 (d, 1H, *J* = 1.9 Hz), 9.09 (d, 1H, *J* = 1.7 Hz), 8.98 (d, 1H, *J* = 8.1 Hz), 8.88 (d, 1H, *J* = 8.0 Hz), 8.84 (d, 1H, *J* = 8.1 Hz), 8.62 (d, 1H, *J* = 2.1 Hz), 8.51 (d, 1H, *J* = 2.1 Hz), 7.94 (d, 1H, *J* = 7.9 Hz), 7.92 (d, 1H, *J* = 7.9 Hz), 7.85 (d, 1H, *J* = 7.8 Hz), 7.49 – 7.28 (m, 15H), 7.02 (t, 2H, *J* = 7.4 Hz), 6.92 (t, 1H, *J* = 7.3 Hz), 5.30 (d, 1H, *J* = 11.0 Hz), 5.19 (s, 2H), 5.18 (s, 2H), 5.11 (d, 1H, *J* = 11.0 Hz), 4.14 (s, 3H), 3.96 (s, 3H). <sup>13</sup>C NMR (126 MHz, CDCl<sub>3</sub>): δ 169.86, 169.23, 163.16, 163.00, 162.79, 162.76, 162.68, 147.64, 147.43, 145.80, 141.16, 140.98, 134.06, 133.83, 133.68, 133.51, 133.15, 132.99, 132.64, 129.85, 129.61, 129.54, 129.49, 129.37, 128.82, 128.67, 127.81, 127.70, 127.30, 126.96, 126.70, 125.95, 125.63, 125.55, 125.29, 124.55, 124.45, 124.24, 123.87, 116.47, 115.53, 805, 62.54, 62.45, 62.24, 62.23. HRMS-ESI: calculated for [M+Na]<sup>+</sup>(C<sub>56</sub>H<sub>45</sub>O<sub>10</sub>N<sub>7</sub>Na)<sup>+</sup>: *m/z* 998.3120, found: *m/z* 998.3163.

**Methyl 3-(3-(3-(3-(2-(benzyloxy)-3-nitrobenzamido)-2-methoxybenzamido)-2-fluorobenzamido)-2-fluorobenzamido)-2-methoxybenzoate (5g)**

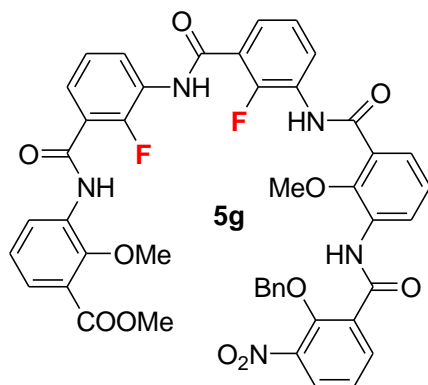

To a solution of **5d** (1.27 g, 2 mmol) and iron (0.45 g, 8 mmol) in EtOH/THF (20 mL/10 mL) was added acetate acid (2 mL). The reaction was refluxed for 2 hours at room temperature. After cooling, the solvent was removed and the residue was dissolved with CH<sub>2</sub>Cl<sub>2</sub> and washed with water and Brine. The organic layer was dried over Na<sub>2</sub>SO<sub>4</sub>. Removal of the solvent

gave the amine product used for the next step reaction without further purification. Compound **1k** (0.6 g, 2.2mmol) was dissolved in CH<sub>2</sub>Cl<sub>2</sub> (15 mL) to which DMF (40 μL), (COCl)<sub>2</sub> (0.4 mL, 3.3 mmol) was added at room temperature. The reaction mixture was stirred for 5 hours then the excess (COCl)<sub>2</sub> was removed in vacuo to produce the chloride compound. A solution of amine (1.21 g, 2 mmol) and TEA (0.4 mL, 5 mmol) in CH<sub>2</sub>Cl<sub>2</sub> (20 mL) was added. The reaction mixture was allowed to stir continuously overnight at room temperature. The reaction mixture was washed with 1 M HCl (10 mL), followed by saturated NaCl (20 mL). Drying over Na<sub>2</sub>SO<sub>4</sub> and removal of solvent in *vacuo* gave the crude product, which was recrystallized from methanol to give the pure product **5g** as a white solid. Yield: 0.93 g, 54%. <sup>1</sup>H NMR (500 MHz, CDCl<sub>3</sub>): δ 9.76 (s, 1H), 9.67 (s, 1H), 9.14 (d, 1H, *J* = 11.7 Hz), 8.79 – 8.63 (m, 4H), 8.56 (d, 1H, *J* = 10.1 Hz), 8.38 (dd, 1H, *J* = 7.9, 1.8 Hz), 8.05 (dd, 1H, *J* = 8.1, 1.8 Hz), 7.95 – 7.85 (m, 3H), 7.64 (dd, 1H, *J* = 7.9, 1.6 Hz), 7.46 (t, 1H, *J* = 10.4 Hz), 7.42-7.36 (m, 3H), 7.33 – 7.29 (m, 2H), 7.23 (m, 2H), 7.20 – 7.17 (m, 2H), 5.18 (s, 2H), 3.90 (s, 3H), 3.89 (s, 3H), 3.63 (s, 3H). MS-ESI: calculated for [M]<sup>+</sup> (C<sub>45</sub>H<sub>34</sub>F<sub>2</sub>N<sub>5</sub>O<sub>11</sub>): *m/z* 858.2228, found: *m/z* 858.2211.

### Pentamer 6b

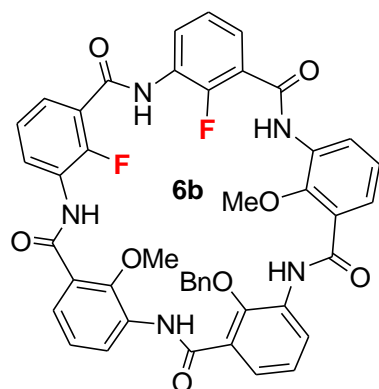

To a solution of **5g** (430 mg, 0.50 mmol) and iron (112 mg, 2.0 mmol) in EtOH/THF (5 mL/2 mL) was added acetate acid (1.0 mL). The reaction was refluxed for 3 hours. After cooling, the solvent was removed and the residue was dissolved with CH<sub>2</sub>Cl<sub>2</sub> and washed with water and Brine. The organic layer was dried over Na<sub>2</sub>SO<sub>4</sub>. After removal of the solvent, the residue was not purified, but used directly in the next step. To the solution of residue in hot dioxane (1.5 mL) was added 1M KOH (1.0 mL). The reaction was heated under reflux for 4 hours. After quenching with water (15 mL), the aqueous layer was neutralized by addition 1M HCl (1.5 mL). The mixture was extracted with CHCl<sub>3</sub> (3x15 mL). The organic extracts were dried over Na<sub>2</sub>SO<sub>4</sub> and concentrated under reduced pressure. To the solution of the residue in dry CH<sub>2</sub>Cl<sub>2</sub> (10 mL) was added BOP (0.55 g, 2.5 mmol) and DIEA (0.25 mL). The reaction was stirred in room temperature for 6 hours. The reaction was washed with HCl solution, aqueous sat. NaHCO<sub>3</sub> and Brine. After removal of the solvent, the residue was purified by flash column chromatography on silica gel using CH<sub>2</sub>Cl<sub>2</sub>/ethyl acetate (20/1 v/v) as the eluent to give the product **6b**, three-step total yield: 187 mg, 47%. <sup>1</sup>H NMR (500 MHz, CDCl<sub>3</sub>): δ 10.91 (s, 1H), 10.87 (s, 1H), 10.35 (d, 1H, *J* = 4.0 Hz), 9.46 (d, 1H, *J* = 20 Hz), 9.28 (dd, 1H, *J* = 21.3, 4.7 Hz), 9.05 (dd, 2H, *J* = 13.2, 8.1 Hz), 9.00 (dd, 2H, *J* = 14.4, 6.8 Hz), 8.87 (d, 1H, *J* = 8.1 Hz), 8.11 (t, 1H, *J* = 7.4 Hz), 8.06-8.03 (m, 3H), 7.99 (dd, 1H, *J* = 7.9, 1.3 Hz), 7.55 – 7.39 (m, 7H), 7.17 (t, 2H, *J* = 7.4 Hz), 7.10 (t, 1H, *J* = 7.3 Hz), 5.05 (d, 2H, *J* = 2.3 Hz), 3.97 (s, 3H), 3.87 (s, 3H). <sup>13</sup>C NMR (126 MHz, CDCl<sub>3</sub>): δ 162.60, 162.44, 162.23, 160.29, 1607, 151.42, 149.49, 146.66, 146.38, 145.84, 134.37, 133.29, 132.62, 132.03, 1305, 128.98, 128.53, 127.75, 127.65, 127.30, 127.27, 127.21, 127.20, 126.71, 126.63, 126.48, 126.46, 126.38, 126.13, 126.03, 125.69, 125.65, 125.37, 125.15, 124.77, 124.49, 124.07, 120.27, 120.23, 119.82, 119.79, 80.14, 62.35, 62.11. HRMS-ESI: calculated for [M]<sup>+</sup>(C<sub>44</sub>H<sub>32</sub>F<sub>2</sub>O<sub>8</sub>N<sub>5</sub>): *m/z* 796.2236, found: *m/z* 796.2216.

**Ethyl 5-(5-(5-(5-(2-methoxy-3-nitro-5-(octyloxy)benzamido)-1-octyl-4-oxo-1,4-dihydropyridine-3-carboxamido)-1-octyl-4-oxo-1,4-dihydropyridine-3-carboxamido)-1-octyl-4-oxo-1,4-dihydropyridine-3-carboxamido)-1-octyl-4-oxo-1,4-dihydropyridine-3-carboxylate (7c)**

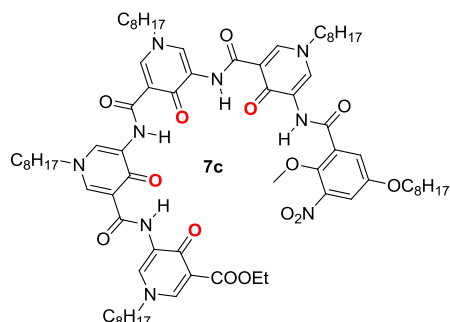

A solution of **7a** (0.68 g, 2.00 mmol) in  $\text{SOCl}_2$  (4.00 mL) was heated under reflux for 2 hours at room temperature. After removal of  $\text{SOCl}_2$ , the **7b** (1.00 mmol) and DIEA (0.68 mL, 4.00 mmol) in dry  $\text{CH}_2\text{Cl}_2$  (60 mL) were added to the residue.

The solution was allowed to proceed for 12 hours at room temperature. After washing with 1M HCl solution, the organic layer was dried over  $\text{Na}_2\text{SO}_4$ . The residue was purified by column chromatography on silica gel using  $\text{MeOH}/\text{CH}_2\text{Cl}_2$  as the eluent to give **7c** as a white solid. Yield: 0.97 g, 72%.  $^1\text{H}$  NMR (500 MHz,  $\text{CDCl}_3/\text{DMSO}-d_6 = 1/9$ , 330K)  $\delta$  12.66 (s, 1H), 12.50 (s, 1H), 12.23 (s, 1H), 10.62 (s, 1H), 8.91 (s, 1H), 8.83 (s, 2H), 8.67 (s, 1H), 8.34 (s, 2H), 7.99 (s, 1H), 7.52 (s, 1H), 7.4 (s, 1H), 7.2 (s, 1H), 4.20 - 3.89 (m, 15H), 1.92 - 1.69 (m, 10H), 1.36-1.28 (m, 53H), 0.85 - 0.82 (s, 15H).  $^{13}\text{C}$  NMR (125 MHz,  $\text{CDCl}_3/\text{DMSO}-d_6 = 1/9$ , 330K)  $\delta$  168.4, 168.4, 168.2, 168.0, 162.1, 162.0, 162.0, 154.3, 153.8, 145.2, 145.1, 144.0, 141.9, 141.8, 141.2, 141.2, 141.1, 140.6, 140.4, 140.3, 132.7, 132.1, 131.4, 129.2, 127.5, 127.1, 126.4, 121.0, 120.8, 115.4, 115.3, 115.3, 115.2, 114.0, 111.8, 111.8, 68.9, 63.3, 58.9, 31.4, 31.3, 30.4, 30.3, 30.2, 28.9, 28.8, 28.7, 28.6, 28.6, 25.9, 25.8, 25.6, 25.5, 22.1, 22.1, 13.6. HRMS-ESI: calculated for  $[\text{M}+\text{H}]^+$  ( $\text{C}_{74}\text{H}_{108}\text{N}_9\text{O}_{14}$ ) :  $m/z$  1346.8010, found:  $m/z$  1346.7756.

**Compound 7**

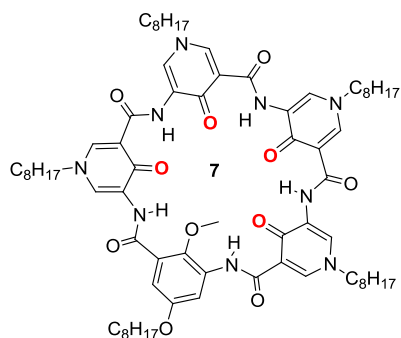

To a solution of **7c** (0.67 g, 0.50 mmol) and iron (0.14 g, 2.50 mmol) in EtOH (50 mL) and THF (50 mL) was added acetate acid (1.00 mL). The solution was refluxed for 5 hours. After cooling, the solvent was filtered and removed then the residue was dissolved in

CH<sub>2</sub>Cl<sub>2</sub> (50 mL) and washed with water (3 × 100 mL). The organic layer was dried over Na<sub>2</sub>SO<sub>4</sub>. The solvent was removed and the residue was dissolved into dioxane (50 mL). 1M of KOH (1.00 mmol, 1.00 mL) was added to the solution and refluxed for 5 hours. After quenching with water (30 mL), the aqueous layer was neutralized by addition of 1M HCl (1.00 mL). The mixture was extracted with CH<sub>2</sub>Cl<sub>2</sub>. The organic extract was dried over Na<sub>2</sub>SO<sub>4</sub> and concentrated under reduced pressure. To the solution of the residue in dry CH<sub>2</sub>Cl<sub>2</sub> (20 mL) was added BOP (0.66 g, 1.50 mmol) and DIEA (0.26 mL, 2.00 mmol). The solution was stirred at room temperature for 12 hours at room temperature. The organic layer was washed with 1M HCl solution. After removal of the solvent, the residue was purified by flash column chromatography on silica gel using MeOH/CH<sub>2</sub>Cl<sub>2</sub> as the eluent to give the product **7**, three-step total yield: 220 mg, 35%. <sup>1</sup>H NMR (500 MHz, DMSO-*d*<sub>6</sub>/CDCl<sub>3</sub> = 9/1, 370K) δ 12.42 (m, 4H), 10.89 (s, 1H), 8.38 – 8.22 (m, 3H), 8.09 (s, 1H), 7.84 (s, 1H), 7.78 (s, 2H), 7.70 (s, 1H), 7.58 (s, 1H), 6.54 (s, 1H), 3.93-3.89 (m, 9H), 3.23 (s, 4H), 1.95 – 1.72 (m, 10H), 1.56 – 1.33 (m, 50H), 0.98 – 0.91 (m, 15H). <sup>13</sup>C NMR (125 MHz, DMSO-*d*<sub>6</sub>/CDCl<sub>3</sub> = 9/1, 370K) δ 167.8, 167.5, 167.3, 167.2, 161.3, 161.2, 161.0, 160.9, 160.7, 160.7, 160.5, 154.4, 141.9, 139.5, 139.4, 139.3, 139.3, 133.2, 131.5, 131.4, 131.3, 131.1, 125.7, 125.5, 125.4, 125.3, 125.0, 124.9, 124.9, 124.9, 122.9, 122.9, 114.5, 114.3, 114.1, 113.8, 110.3, 107.6, 107.6, 67.6, 63.0, 58.1, 48.6, 31.3, 31.2, 29.9, 29.8, 29.2, 29.0, 28.8, 28.7, 28.7, 28.6, 28.6, 28.5, 25.9, 25.8, 25.8, 22.0, 21.9, 13.6, 13.5. MS-APCI: calculated for [M+Na]<sup>+</sup> (C<sub>72</sub>H<sub>103</sub>N<sub>9</sub>O<sub>11</sub>Na): *m/z* 1292.7669, found: *m/z* 1292.7646.

#### Methyl 2-ethoxy-3-nitro-5-(octyloxy)benzoate (**8b**)

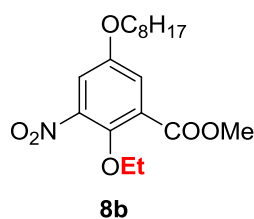

Compound **8a** (3.25 g, 10 mmol) was dissolved in anhydrous DMF (30 mL), to which anhydrous K<sub>2</sub>CO<sub>3</sub> (4.00 g, 25.0 mmol) and bromoethane (0.89 mL, 12.0 mmol) was added. The mixture was heated under 60 °C for 4 hours. CH<sub>2</sub>Cl<sub>2</sub> (100 mL) was then added and the reaction mixture was filtered. The solvent was removed in *vacuo* and the concentrate was dissolved in CH<sub>2</sub>Cl<sub>2</sub> (100 mL), washed with

water (3 × 50 mL) and dried over anhydrous Na<sub>2</sub>SO<sub>4</sub>. Removal of CH<sub>2</sub>Cl<sub>2</sub> gave the crude product, which was recrystallized from MeOH to give pure product **8b** as a yellow solid. Yield: 2.44 g, 72%. <sup>1</sup>H NMR (500 MHz, CDCl<sub>3</sub>) δ 7.49 (d, *J* = 3.3 Hz, 1H), 7.37 (d, *J* = 3.2 Hz, 1H), 4.07 (q, *J* = 7.0 Hz, 2H), 3.95 (t, *J* = 6.5 Hz, 2H), 3.90 (s, 3H), 1.78 – 1.72 (m, 2H), 1.45 – 1.38 (m, 2H), 1.30 (m, 11H), 0.85 (t, *J* = 6.9 Hz, 3H). <sup>13</sup>C NMR (125 MHz, CDCl<sub>3</sub>) δ 164.76, 154.10, 145.73, 145.28, 128.03, 121.27, 113.78, 72.95, 69.06, 52.58, 31.67, 29.14, 29.09, 28.85, 25.79, 22.53, 15.18, 13.96. HRMS-ESI: calculated for [M]<sup>+</sup> (C<sub>18</sub>H<sub>27</sub>O<sub>6</sub>N<sub>1</sub>): *m/z* 353.1838, found: *m/z* 353.1839.

### 2-ethoxy-3-nitro-5-(octyloxy)benzoic acid (**8c**)

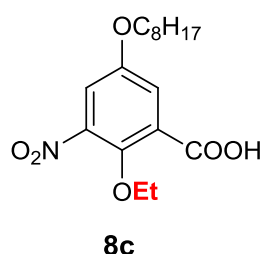

Compound **8b** (2.81 g, 8.30 mmol) was dissolved in hot MeOH (30 mL), to which 1M NaOH (17.0 mL, 17.0 mmol) was added. The mixture was heated under reflux for 1 hour and then quenched with water (100 mL). The aqueous layer was neutralized by addition of 1M HCl (17.0 mL). The solution was removed under reduced pressure and the mixture was extracted with CH<sub>2</sub>Cl<sub>2</sub>. The organic extracts were dried over NaSO<sub>4</sub> and concentrated under reduced pressure to give a pure white solid **8c**. Yield: 2.30 g, 85%. <sup>1</sup>H NMR (500 MHz, CDCl<sub>3</sub>) δ 7.80 (d, *J* = 3.3 Hz, 1H), 7.55 (d, *J* = 3.2 Hz, 1H), 4.19 (dd, *J* = 14.0, 7.0 Hz, 2H), 4.01 (t, *J* = 6.4 Hz, 2H), 1.84 – 1.75 (m, 2H), 1.51 – 1.39 (m, 5H), 1.30 (m, 8H), 0.89 (t, *J* = 6.7 Hz, 3H). <sup>13</sup>C NMR (125 MHz, CDCl<sub>3</sub>) δ 166.69, 154.70, 145.39, 145.07, 125.99, 122.01, 116.00, 74.09, 69.34, 31.73, 29.19, 29.14, 28.87, 25.84, 22.60, 15.27, 14.04. HRMS-ESI: calculated for [M]<sup>+</sup> (C<sub>17</sub>H<sub>24</sub>NO<sub>6</sub>): *m/z* 338.1609, found: *m/z* 338.1595.

**Ethyl 5-(5-(5-(5-(2-ethoxy-3-nitro-5-(octyloxy)benzamido)-1-octyl-4-oxo-1,4-dihydropyridine-3-carboxamido)-1-octyl-4-oxo-1,4-dihydropyridine-3-carboxamido)-1-octyl-4-oxo-1,4-dihydropyridine-3-carboxylate (**8d**)**

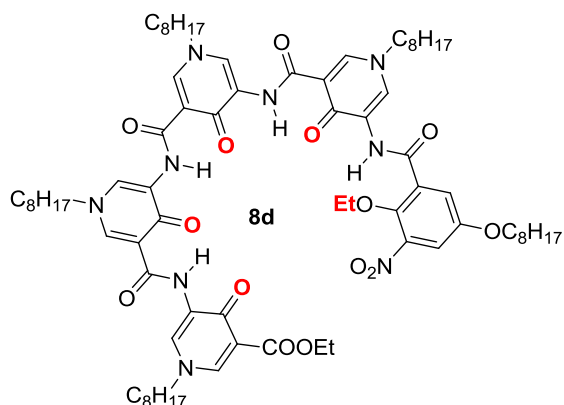

A solution of **8c** (0.68 g, 2.00 mmol) in SOCl<sub>2</sub> (4.00 mL) was heated under reflux for 2 hours at room temperature. After removal of the SOCl<sub>2</sub>, **7b** (1.04 g, 1.0 mmol) and DIEA (0.68 mL, 4.00 mmol) in dry CH<sub>2</sub>Cl<sub>2</sub> (60 mL) were added to the residue. The solution was allowed to

proceed for 12 hours at room temperature. After washing with 1M HCl solution, the organic layer was dried over Na<sub>2</sub>SO<sub>4</sub>. The residue was purified by column chromatography on silica gel using MeOH/CH<sub>2</sub>Cl<sub>2</sub> as the eluent to give **8d** as a white solid. Yield: 0.91 g, 67%. <sup>1</sup>H NMR (500 MHz, CDCl<sub>3</sub>/DMSO-*d*<sub>6</sub> = 1:9, 370K) δ 12.73 (s, 1H), 12.65 (s, 1H), 12.56 (s, 1H), 10.87 (s, 1H), 9.13 (s, 2H), 9.04 (s, 1H), 8.94 (s, 1H), 8.62 (s, 1H), 8.58 (s, 1H), 8.54 (s, 1H), 8.31 (s, 1H), 7.56 (d, *J* = 3.0 Hz, 1H), 7.50 (d, *J* = 3.0 Hz, 1H), 4.29 – 4.00 (m, 15H), 1.84 – 1.66 (m, 10H), 1.40 – 1.13 (m, 53H), 0.87 – 0.79 (m, 15H). <sup>13</sup>C NMR (125 MHz, CDCl<sub>3</sub>/DMSO-*d*<sub>6</sub> = 1:9, 330K) δ 168.56, 168.54, 168.52, 168.46, 168.23, 168.21, 168.20, 167.19, 167.17, 166.94, 164.50, 162.85, 162.81, 162.76, 162.53, 162.29, 154.15, 144.59, 144.55, 143.99, 143.31, 141.71, 141.69, 141.11, 140.49, 140.43, 140.41, 132.94, 132.30, 131.54, 130.39, 128.40, 127.15, 126.36, 120.59, 115.47, 114.19, 74.07, 69.18, 58.80, 58.66, 58.28, 53.64, 41.86, 31.28, 31.21, 30.17, 29.14, 28.80, 28.70, 28.65, 28.58, 28.52, 25.85, 25.51, 22.06, 22.02, 13.45, 13.43, 13.41. HRMS-ESI: calculated for [M+Na]<sup>+</sup> (C<sub>75</sub>H<sub>109</sub>N<sub>9</sub>NaO<sub>14</sub>): *m/z* 1382.7986, found: *m/z* 1382.7949.

## Compound 8

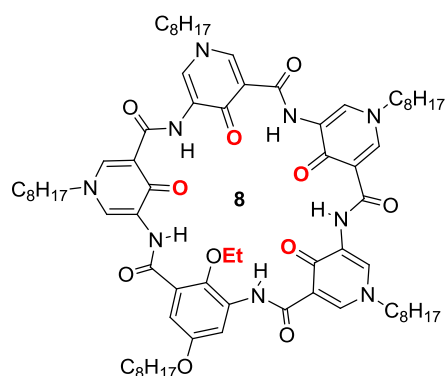

To a solution of **8d** (0.68 g, 0.50 mmol) and iron (0.14 g, 2.50 mmol) in EtOH (50 mL) and THF (50 mL) was added acetate acid (1.00 mL). The solution was refluxed for 5 hours. After cooling, the solvent was filtered and removed then the residue was dissolved in CH<sub>2</sub>Cl<sub>2</sub> (50 mL) and

washed with water (3 × 100 mL). The organic layer was dried over Na<sub>2</sub>SO<sub>4</sub>. The solvent was removed and the residue was dissolved into dioxane (50 mL). 1M of KOH (1.00 mmol, 1.00 mL) was added to the solution and refluxed for 5 hours. After quenching with water (30 mL), the aqueous layer was neutralized by addition of 1M HCl (1.00 mL). The mixture was extracted with CH<sub>2</sub>Cl<sub>2</sub>. The organic extract was dried over Na<sub>2</sub>SO<sub>4</sub> and concentrated under reduced pressure. To the solution of the residue in dry CH<sub>2</sub>Cl<sub>2</sub> (20 mL) was added BOP (0.66 g, 1.50 mmol) and DIEA (0.26 mL, 2.00 mmol). The solution was stirred at room temperature for 12 hours at room temperature. The organic layer was washed with 1M HCl solution. After removal of the solvent, the residue was purified by flash column chromatography on silica gel using MeOH/CH<sub>2</sub>Cl<sub>2</sub> as the eluent to give the product **8**, three-step total yield: 269 mg, 42%. <sup>1</sup>H NMR (500 MHz, DMSO-*d*<sub>6</sub>/CDCl<sub>3</sub> = 9/1, 370K) δ 13.11 (s, 1H), 13.08 (s, 1H), 13.06 (s, 1H), 13.03 (s, 1H), 11.24 (s, 1H), 8.82 – 8.57 (m, 4H), 8.23 – 8.16 (m, 5H), 7.03 (s, 1H), 4.14 – 4.10 (m, 10H), 3.80 (s, 2H), 1.98 – 1.85 (m, 8H), 1.62 – 1.56 (m, 4H), 1.47 – 1.25 (m, 51H), 0.93 – 0.88 (m, 15H). <sup>13</sup>C NMR (125 MHz, DMSO-*d*<sub>6</sub>/CDCl<sub>3</sub> = 9/1, 370K) δ 168.3, 168.2, 168.1, 167.8, 161.7, 161.6, 161.5, 161.4, 155.3, 140.6, 140.2, 134.0, 131.9, 131.8, 131.4, 131.0, 128.5, 126.2, 126.1, 124.7, 124.6, 115.0, 114.6, 114.5, 114.4, 111.0, 108.9, 104.6, 72.4, 68.2, 67.7, 64.8, 58.5, 58.4, 54.3, 31.3, 31.2, 31.2, 30.3, 30.2, 30.1, 30, 29.9, 29.1, 29.0, 28.9, 28.7, 28.6, 28.5, 25.9, 25.8, 22.1, 22.0, 14.5, 13.7, 13.6.

## Ethyl

**5-(5-(5-(5-(2-fluoro-3-nitrobenzamido)-1-octyl-4-oxo-1,4-dihydropyridine-3-carboxamido)-1-octyl-4-oxo-1,4-dihydropyridine-3-carboxamido)-1-octyl-4-oxo-1,4-dihydropyridine-3-carboxylate (9b)**

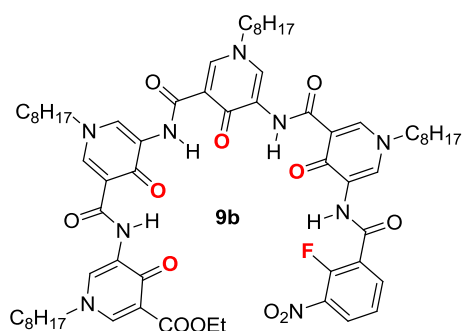

A solution of **9a** (0.27 g, 2.00 mmol) in SOCl<sub>2</sub> (4.00 mL) was heated under reflux for 2 hours at room temperature. After removal of the SOCl<sub>2</sub>, **7b** (1.04 g, 1.0 mmol) and DIEA (0.68 mL, 4.00 mmol) in dry CH<sub>2</sub>Cl<sub>2</sub> (60 mL) were added to the residue. The



solution was allowed to proceed for 12 hours at room temperature. After washing with 1M HCl solution, the organic layer was dried over Na<sub>2</sub>SO<sub>4</sub>. The residue was purified by column chromatography on silica gel using MeOH/CH<sub>2</sub>Cl<sub>2</sub> as the eluent to give **9b** as a white solid. Yield: 0.84 g, 71%. <sup>1</sup>H NMR (500 MHz, CDCl<sub>3</sub>/DMSO-*d*<sub>6</sub> = 1:9, 370K) δ 12.60 (s, 1H), 12.49 (s, 1H), 12.41 (s, 1H), 10.50 (s, 1H), 9.07 (s, 2H), 8.97 (s, 1H), 8.91 (s, 1H), 8.52 (s, 1H), 8.46 (s, 1H), 8.44 (s, 1H), 8.21 – 8.19 (m, 2H), 8.07 (s, 1H), 7.54 (t, *J* = 7.3 Hz, 1H), 4.22 – 4.17 (m, 4H), 4.12 – 4.11 (m, 4H), 4.01 (t, *J* = 6.4 Hz, 2H), 1.94 – 1.76 (m, 8H), 1.35 – 1.27 (m, 43H), 0.87 – 0.85 (m, 12H). <sup>13</sup>C NMR (500 MHz, CDCl<sub>3</sub>/DMSO-*d*<sub>6</sub> = 1:9, 370K) δ 168.3, 168.2, 166.8, 166.7, 164.8, 164.3, 162.7, 162.5, 162.4, 161.3, 159.1, 153.5, 151.4, 142.0, 141.9, 141.2, 141.1, 137.6, 137.5, 135.4, 135.3, 132.5, 132.4, 131.9, 131.1, 131.0, 130.9, 129.6, 129.5, 129.4, 128.5, 128.4, 127.6, 127.5, 127.4, 126.7, 126.6, 126.5, 124.6, 124.5, 115.4, 115.2, 115.0, 114.2, 104.5, 59.7, 58.2, 58.1, 58.0, 57.5, 31.1, 30.1, 30, 29.9, 28.9, 28.9, 28.4, 25.6, 21.9, 14.0, 13.6. HRMS-APCI: calculated for [M+H]<sup>+</sup> (C<sub>65</sub>H<sub>89</sub>O<sub>12</sub>N<sub>9</sub>F): *m/z* 1206.6609, found: *m/z* 1206.6567.

## Compound 9

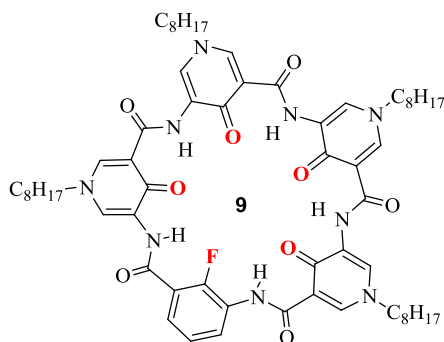

To a solution of **9b** (0.60 g, 0.50 mmol) and iron (0.14 g, 2.50 mmol) in EtOH (50 mL) and THF (50 mL) was added acetate acid (1.00 mL). The solution was refluxed for 5 hours. After cooling, the solvent was filtered and removed then the residue was dissolved in CH<sub>2</sub>Cl<sub>2</sub> (50 mL) and washed with water (3 × 100 mL). The organic layer was dried over

Na<sub>2</sub>SO<sub>4</sub>. The solvent was removed and the residue was dissolve into dioxane (50 mL). 1M of KOH (1.00 mmol, 1.00 mL) was added to the solution and refluxed for 5 hours. After quenching with water (30 ml), the aqueous layer was neutralized by addition of 1M HCl (1.00 mL). The mixture was extracted with CH<sub>2</sub>Cl<sub>2</sub>. The organic extract was dried over NaSO<sub>4</sub> and concentrated under reduced pressure. To the solution of the residue in dry CH<sub>2</sub>Cl<sub>2</sub> (20 mL) was added BOP (0.66 g, 1.50 mmol) and DIEA (0.26 mL, 2.00 mmol).

The solution was stirred at room temperature for 12 hours at room temperature. The organic layer was washed with 1M HCl solution. After removal of the solvent, the residue was purified by flash column chromatography on silica gel using MeOH/CH<sub>2</sub>Cl<sub>2</sub> as the eluent to give the product **9**, three-step total yield: 242 mg, 43%. HRMS-APCI: calculated for [M+H]<sup>+</sup> (C<sub>63</sub>H<sub>85</sub>O<sub>9</sub>N<sub>9</sub>F) : m/z 1130.6449, found: m/z 1130.6451. HRMS-APCI: calculated for [M+H]<sup>+</sup> (C<sub>63</sub>H<sub>85</sub>O<sub>9</sub>N<sub>9</sub>F) : m/z 1130.6449, found: m/z 1130.6451.

**Methyl 2-methoxy-3-(2-methoxy-3-nitro-5-(octyloxy)benzamido)-5-(octyloxy)benzoate (10b)**

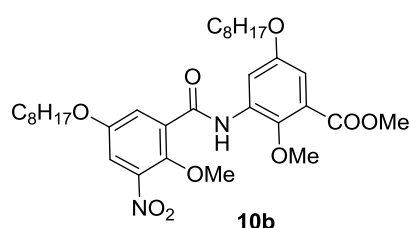

To a solution of **10a** (0.56 g, 1.65 mmol) and iron (0.37 g, 6.60 mmol) in EtOH (20 mL) was added acetate acid (1.65 mL). The solution was refluxed for 2 hours at room temperature. After cooling, the solvent was removed and the residue was dissolved with CH<sub>2</sub>Cl<sub>2</sub> and washed with water and Brine. The organic layer was dried over Na<sub>2</sub>SO<sub>4</sub>. Removal of the solvent gave the amine product, which was used for the next step reaction without further purification. A solution of **7a** (0.58 g, 1.80 mmol) in SOCl<sub>2</sub> (3.00 mL) was heated under reflux for 2 hours at room temperature. After removal of the SOCl<sub>2</sub>, the amine product (1.65 mmol) and DIEA (0.61 mL, 3.60 mmol) in dry CH<sub>2</sub>Cl<sub>2</sub> (20 mL) were added to the residue. The solution was allowed to proceed for 12 hours at room temperature. After washing with 1M HCl solution, the organic layer was dried over Na<sub>2</sub>SO<sub>4</sub>. After removal of the solvent, the residue was purified by flash column chromatography on silica gel using hexane/ethyl acetate as the eluent to give the product **10b**. Yield: 0.88 g, 87%. <sup>1</sup>H NMR (500 MHz, CDCl<sub>3</sub>) δ 10.48 (s, 1H), 8.46 (d, *J* = 3.1 Hz, 1H), 7.94 (d, *J* = 3.3 Hz, 1H), 7.49 (d, *J* = 3.3 Hz, 1H), 7.13 (d, *J* = 3.1 Hz, 1H), 4.01 (m, 7H), 3.93 (s, 3H), 3.88 (s, 3H), 1.85 – 1.74 (m, 4H), 1.51 – 1.40 (m, 4H), 1.30 (m, 16H), 0.89 (m, 6H). <sup>13</sup>C NMR (125 MHz, CDCl<sub>3</sub>) δ 158.7, 154.2, 148.2, 148.1, 137.7, 137.6, 136.1, 126.3, 122.5, 116.7, 114.1, 108.1, 104.7, 104.1, 62.2, 61.6, 57.6, 55.6, 45.3, 24.8, 24.7, 22.3, 22.2, 22.2, 22.1, 22.1, 21.9, 19.0, 18.8, 15.7, 15.6, 7.1, 7.0. HRMS-ESI: calculated for [M+Na]<sup>+</sup> (C<sub>33</sub>H<sub>48</sub>N<sub>2</sub>O<sub>9</sub>Na): *m/z*

639.3252, found:  $m/z$  639.3268.

**2-methoxy-3-(2-methoxy-3-nitro-5-(octyloxy)benzamido)-5-(octyloxy)benzoic acid (10c)**

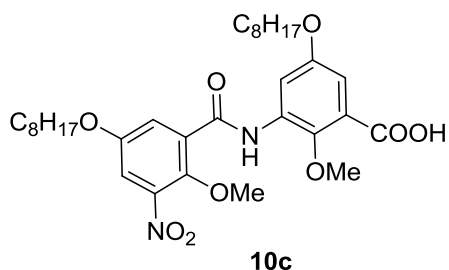

Compound **10b** (3.08 g, 5.0 mmol) was dissolved in hot 1,4-dioxane (20 mL) to which 1M KOH (10 mL, 10 mmol) and KCl (3.70g, 50 mmol) were added. The mixture was heated at 60 °C for 24 hours and then quenched with water (10 mL).

The aqueous layer was neutralized by addition of 1M HCl (10 mL). The solvent was removed at reduced pressure and the mixture was extracted with CH<sub>2</sub>Cl<sub>2</sub>. The organic extract was dried over NaSO<sub>4</sub> and concentrated under reduced pressure to give a pure white solid **10c**. Yield: 2.20 g, 73.0%, <sup>1</sup>H NMR (300 MHz, CDCl<sub>3</sub>)  $\delta$  10.41 (s, 1H), 8.50 (d,  $J$  = 3.1 Hz, 1H), 7.95 (d,  $J$  = 3.3 Hz, 1H), 7.51 (d,  $J$  = 3.3 Hz, 1H), 7.32 (d,  $J$  = 3.2 Hz, 1H), 4.08 – 3.98 (m, 7H), 3.94 (s, 3H), 1.87 – 1.74 (m, 4H), 1.53 – 1.40 (m, 5H), 1.29 (dd,  $J$  = 12.2, 8.5 Hz, 18H), 0.89 (t,  $J$  = 6.8 Hz, 6H). <sup>13</sup>C NMR (125 MHz, CDCl<sub>3</sub>)  $\delta$  168.5, 161.3, 155.6, 155.2, 144.7, 144.6, 143.4, 133.2, 129.3, 122.3, 121.2, 115.2, 112.7, 112.1, 69.3, 68.7, 64.6, 63.1, 31.8, 31.7, 29.3, 29.2, 29.2, 29.1, 28.9, 25.9, 25.8, 22.7, 22.6, 14.1, 14.0. HRMS-ESI: calculated for [M-H]<sup>-</sup> (C<sub>32</sub>H<sub>45</sub>N<sub>2</sub>O<sub>9</sub>):  $m/z$  601.3131, found:  $m/z$  601.3147.

**Ethyl 5-(5-(5-(2-methoxy-3-(2-methoxy-3-nitro-5-(octyloxy)benzamido)-5-(octyloxy)benzamido)-1-octyl-4-oxo-1,4-dihydropyridine-3-carboxamido)-1-octyl-4-oxo-1,4-dihydropyridine-3-carboxamido)-1-octyl-4-oxo-1,4-dihydropyridine-3-carboxylate (10e)**

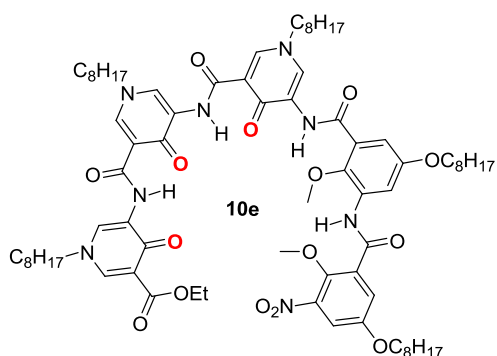

A solution of **10c** (1.20 g, 2.00 mmol) in SOCl<sub>2</sub> (2.00 mL) was heated under reflux for 2 hours at room temperature. After removal of the SOCl<sub>2</sub>, **10d** (0.79 g, 1.00 mmol) and DIEA (0.68 mL, 4.00 mmol) in dry CH<sub>2</sub>Cl<sub>2</sub> (60 mL) were added to the residue. The solution was

allowed to proceed for 12 hours at room temperature. After washing with HCl solution, the organic layer was dried over Na<sub>2</sub>SO<sub>4</sub>. The residue was purified by column chromatography on silica gel using MeOH/CH<sub>2</sub>Cl<sub>2</sub> as the eluent to give **10e** as a white solid. Yield: 1.04 g, 76%. <sup>1</sup>H NMR (500 MHz, CDCl<sub>3</sub>/DMSO-*d*<sub>6</sub> = 1/4) δ 12.48 (s, 1H), 12.42 (s, 1H), 10.81 (s, 1H), 10.58 (s, 1H), 9.04 (s, 2H), 8.89 (s, 1H), 8.40 (s, 1H), 8.36 (s, 1H), 8.11 (s, 1H), 8.09 (s, 1H), 7.49 (s, 1H), 7.36 (s, 1H), 7.26 (s, 1H), 4.16 (s, 2H), 4.05 – 3.89 (m, 16H), 1.85 – 1.76 (m, 10H), 1.43 – 1.24 (m, 53H), 0.83 (s, 15H). <sup>13</sup>C NMR (125 MHz, CDCl<sub>3</sub>/DMSO-*d*<sub>6</sub> = 1/4) δ 168.4, 168.3, 167.0, 164.3, 163.3, 162.8, 162.8, 155.3, 154.3, 144.4, 144.0, 142.8, 142.0, 141.3, 140.8, 133.0, 132.9, 132.3, 131.9, 127.5, 126.8, 126.5, 126.0, 120.3, 115.4, 115.1, 114.3, 113.3, 113.2, 112.6, 112.6, 111.0, 110.9, 69.1, 68.4, 64.0, 62.7, 59.9, 58.7, 58.5, 58.0, 31.4, 31.3, 31.2, 30.3, 30.2, 30.2, 28.9, 28.8, 28.8, 28.7, 28.7, 28.6, 28.6, 25.8, 25.7, 25.5, 22.2, 22.1, 22.1, 14.1, 13.7, 13.6. MS-ESI: calculated for [M+H]<sup>+</sup> (C<sub>76</sub>H<sub>111</sub>N<sub>8</sub>NaO<sub>15</sub>): *m/z* 1376.7312, found: *m/z* 1376.8.

## Compound 10

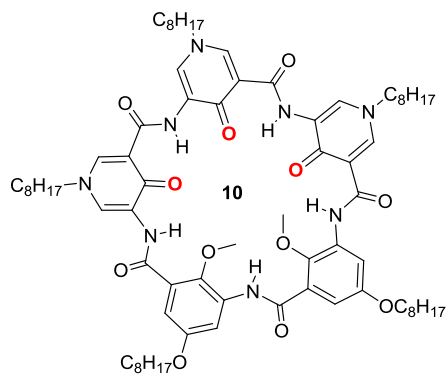

To a solution of **10e** (0.69 g, 0.50 mmol) and iron (0.14 g, 2.50 mmol) in EtOH (50 mL) and THF (50 mL) was added acetate acid (1.00 mL). The solution was refluxed for 5 hours. After cooling, the solvent was filtered and removed then the residue was dissolved in CH<sub>2</sub>Cl<sub>2</sub> (50 mL) and washed with water (3 × 100 mL). The organic layer

was dried over Na<sub>2</sub>SO<sub>4</sub>. The solvent was removed and the amine product was dissolved into dioxane (50 mL). 1M of KOH (1.00 mmol, 1.00 mL) was added to the solution and refluxed for 5 hours. After quenching with water (30 ml), the aqueous layer was neutralized by addition 1M HCl (1.00 mL). The mixture was extracted with CH<sub>2</sub>Cl<sub>2</sub>. The organic extract was dried over NaSO<sub>4</sub> and concentrated under reduced pressure. To the solution of the residue in dry CH<sub>2</sub>Cl<sub>2</sub> (20 mL) was added BOP (0.66 g, 1.50 mmol) and DIEA (0.26 mL, 2.00 mmol). The solution was stirred at room temperature for 12 hours at room

temperature. The solution was washed with HCl solution. After removal of the solvent, the residue was purified by flash column chromatography on silica gel using MeOH/CH<sub>2</sub>Cl<sub>2</sub> as the eluent to give the product **10**, three-step total yield: 292 mg, 45%. <sup>1</sup>H NMR (500 MHz, CDCl<sub>3</sub>/DMSO-*d*<sub>6</sub> = 1/4) δ 13.10 (s, 1H), 13.02 (s, 1H), 12.96 (s, 1H), 11.42 (s, 1H), 11.13 (s, 1H), 8.77 (s, 1H), 8.75 (s, 1H), 8.62 (s, 1H), 8.24 (s, 1H), 8.20 (s, 1H), 8.14 (s, 1H), 8.10 (s, 1H), 8.08 (s, 1H), 7.14 (s, 1H), 7.01 (s, 1H), 4.12 – 4.00 (m, 16H), 2.02 – 1.89 (m, 6H), 1.87 – 1.80 (m, 4H), 1.56 – 1.51 (m, 4H), 1.48 – 1.23 (m, 46H), 0.90 – 0.83 (m, 15H). <sup>13</sup>C NMR (125 MHz, CDCl<sub>3</sub>/ DMSO-*d*<sub>6</sub> = 1/4) δ 168.6, 168.2, 162.6, 162.2, 162.1, 161.6, 161.4, 155.0, 154.9, 141.8, 141.7, 140.1, 139.9, 139.8, 133.6, 133.6, 132.3, 132.2, 131.7, 126.1, 126.0, 125.5, 124.4, 123.7, 115.2, 114.8, 114.6, 111.0, 110.4, 108.3, 67.9, 67.8, 63.9, 63.4, 58.8, 58.7, 58.7, 31.5, 31.5, 31.4, 31.3, 30.3, 30.2, 29.4, 29.3, 29.2, 29.0, 28.9, 28.8, 28.7, 28.7, 28.7, 28.6, 26.1, 26.0, 22.3, 22.2, 13.7, 13.6. HRMS-ESI: calculated for [M+Na]<sup>+</sup> (C<sub>74</sub>H<sub>106</sub>O<sub>12</sub>N<sub>8</sub>Na) : *m/z* 1321.7822, found: *m/z* 1321.7762.

**Ethyl 5-(2-methoxy-3-nitro-5-(octyloxy)benzamido)-1-octyl-4-oxo-1,4-dihydropyridine-3-carboxylate (11b)**

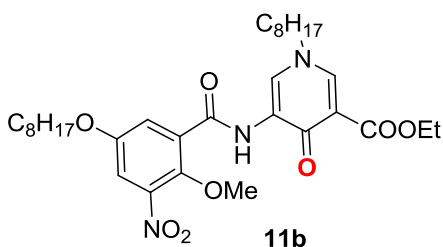

A solution of **7a** (3.25 g, 10 mmol) in SOCl<sub>2</sub> (5.00 mL) was heated under reflux for 2 hours at room temperature. After removal of the SOCl<sub>2</sub>, **11a** (2.94 g, 10 mmol) and DIEA (3.40 mL, 20 mmol) in dry CH<sub>2</sub>Cl<sub>2</sub> (30 mL) were added to the residue. The

solution was allowed to proceed for 12 hours at room temperature. After washing with 1M HCl solution, aqueous sat. NaHCO<sub>3</sub> and Brine, the organic layer was dried over Na<sub>2</sub>SO<sub>4</sub>. The residue was purified by column chromatography on silica gel using hexane/ethyl acetate as the eluent to give **11b** as a white solid. Yield: 5.23 g, 87%. <sup>1</sup>H NMR (500 MHz, CDCl<sub>3</sub>) δ 11.02 (s, 1H), 8.93 (d, *J* = 2.3 Hz, 1H), 8.17 (d, *J* = 2.3 Hz, 1H), 7.86 (d, *J* = 3.3 Hz, 1H), 7.47 (d, *J* = 3.3 Hz, 1H), 4.40 (q, *J* = 7.1 Hz, 2H), 4.06 (s, 3H), 4.01 (t, *J* = 6.5 Hz, 3H), 3.91 (t, *J* = 7.4 Hz, 2H), 1.93 – 1.84 (m, 2H), 1.83 – 1.75 (m, 2H), 1.49 – 1.22 (m, 22H), 0.91 – 0.85 (m, 6H). <sup>13</sup>C NMR (125 MHz, CDCl<sub>3</sub>) δ 167.7, 165.8, 161.8, 154.8,

145.4, 144.8, 143.1, 133.0, 128.7, 126.6, 121.1, 115.1, 114.3, 105.0, 69.2, 64.4, 59.0, 52.4, 31.7, 31.6, 30.7, 29.2, 29.1, 29.0, 28.9, 28.9, 26.2, 25.9, 22.6, 22.5, 14.1, 14.0. HRMS-ESI: calculated for  $[M+Na]^+$  ( $C_{32}H_{47}O_8N_3Na$ ) :  $m/z$  624.3255, found:  $m/z$  627.3265.

**Methyl 2-methoxy-3-(5-(2-methoxy-3-nitro-5-(octyloxy)benzamido)-1-octyl-4-oxo-1,4-dihydropyridine-3-carboxamido)-5-(octyloxy)benzoate (11d)**

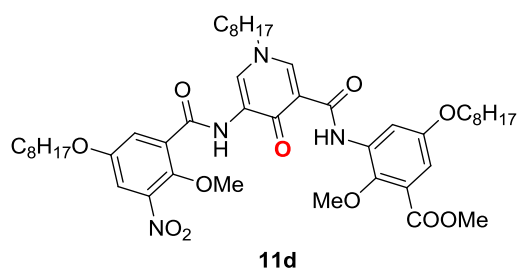

To a solution of **10a** (2.03 g, 6.00 mmol) and iron (1.68 g, 30 mmol) in EtOH (30 mL) was added acetate acid (6.00 mL). The solution was refluxed for 5 hours. After cooling, the reaction solvent was filtered and removed

then the residue was dissolved in  $CH_2Cl_2$  (50 mL) and washed with water ( $3 \times 100$  mL). The organic layer was dried over  $Na_2SO_4$ . Removal of the solvent gave the amine product, which was used for the next step reaction without further purification. Compound **11b** (6.01 g, 10 mmol) was dissolved in hot 1,4-dioxane (30 mL) to which 1M KOH (20 mL, 20 mmol) and KCl (3.70 g, 50 mmol) were added. The mixture was heated at 60 °C for 24 hours and then quenched with water (100 mL). The aqueous layer was neutralized by addition of 1M HCl (20 mL). The solvent was removed at reduced pressure and the mixture was extracted with  $CH_2Cl_2$ . The organic extracts were dried over  $NaSO_4$  and concentrated under reduced pressure to give a pure white solid **11c**. Yield: 5.16 g, 89.0%. Acid **11c** (2.86 g, 5.0 mmol) was dissolved in  $CH_2Cl_2$  (20 mL) to which ethyl chloroformate (0.60 mL, 6.00 mmol) was added at 0 °C. The reaction mixture was stirred for at least 15 minutes after which a solution of amine and NMM (0.60 mL, 6.00 mmol) dissolved in  $CH_2Cl_2$  (20 mL) were added. The reaction mixture was allowed to stir continuously for 12 hours at room temperature. The reaction mixture was washed with 1 M HCl and Brine. Drying over  $Na_2SO_4$  and removal of solvent in *vacuo* to gave the crude product. It was purified by flash column chromatography on silica gel using hexane/ethyl acetate as the eluent to give the product **11d**. Yield: 2.72 g, 63%.  $^1H$  NMR (500 MHz,

CDCl<sub>3</sub>)  $\delta$  12.72 (s, 1H), 11.04 (s, 1H), 8.96 (d,  $J$  = 2.2 Hz, 1H), 8.44 (d,  $J$  = 2.3 Hz, 1H), 8.43 (d,  $J$  = 3.1 Hz, 1H), 7.86 (d,  $J$  = 3.3 Hz, 1H), 7.47 (d,  $J$  = 3.3 Hz, 1H), 7.05 (d,  $J$  = 3.1 Hz, 1H), 4.08 (s, 3H), 4.02 – 3.95 (m, 6H), 3.94 (s, 3H), 3.92 (s, 3H), 1.93 – 1.85 (m, 2H), 1.82 – 1.72 (m, 4H), 1.47 – 1.39 (m, 4H), 1.28 – 1.32 (m, 26H), 0.89 – 0.84 (m, 9H). <sup>13</sup>C NMR (125 MHz, CDCl<sub>3</sub>)  $\delta$  169.0, 166.1, 162.4, 161.5, 154.9, 154.8, 145.2, 144.7, 143.6, 141.2, 134.2, 131.6, 128.4, 127.3, 124.1, 121.0, 116.2, 115.1, 111.3, 110.8, 69.2, 68.4, 64.2, 62.3, 59.3, 52.2, 31.8, 31.7, 31.6, 30.7, 29.3, 29.2, 29.2, 29.1, 28.9, 28.8, 26.2, 25.9, 25.8, 22.6, 22.6, 22.5, 14.0, 13.9. HRMS-ESI: calculated for [M+Na]<sup>+</sup> (C<sub>47</sub>H<sub>68</sub>O<sub>11</sub>N<sub>4</sub>Na) :  $m/z$  887.4777, found:  $m/z$  887.4736.

**2-methoxy-3-(5-(2-methoxy-3-nitro-5-(octyloxy)benzamido)-1-octyl-4-oxo-1,4-dihydro pyridine-3-carboxamido)-5-(octyloxy)benzoic acid (11e)**

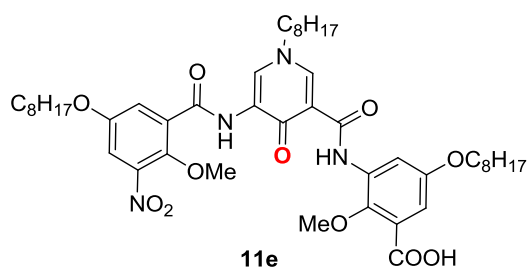

Compound **11d** (3.46 g, 4.00 mmol) was dissolved in hot 1,4-dioxane (10 mL) to which 1M KOH (8.00 mL, 8.00 mmol) and KCl (1.48 g, 20 mmol) were added. The mixture was heated at 60 °C for 24 hours

and then quenched with water (50 mL). The aqueous layer was neutralized by addition of 1M HCl (8.00 mL). The solution was removed under reduced pressure and the mixture was extracted with CH<sub>2</sub>Cl<sub>2</sub>. The organic extracts were dried over NaSO<sub>4</sub> and concentrated under reduced pressure, and the residue was purified by flash column chromatography on silica gel using hexane/ethyl acetate as the eluent to give the product **11e**. Yield: 2.45 g, 72.0%.

<sup>1</sup>H NMR (500 MHz, CDCl<sub>3</sub>)  $\delta$  12.74 (s, 1H), 11.07 (s, 1H), 9.01 (d,  $J$  = 2.2 Hz, 1H), 8.49 (d,  $J$  = 2.2 Hz, 1H), 8.45 (d,  $J$  = 3.1 Hz, 1H), 7.89 (d,  $J$  = 3.3 Hz, 1H), 7.50 (d,  $J$  = 3.3 Hz, 1H), 7.08 (d,  $J$  = 3.1 Hz, 1H), 4.10 (s, 3H), 4.05 – 3.97 (m, 5H), 3.96 (s, 3H), 3.94 (s, 3H), 1.97 – 1.87 (m, 2H), 1.85 – 1.73 (m, 4H), 1.51 – 1.41 (m, 4H), 1.36 – 1.25 (m, 24H), 0.91 – 0.86 (m, 9H). <sup>13</sup>C NMR (125 MHz, CDCl<sub>3</sub>)  $\delta$  169.1, 166.2, 162.5, 161.7, 155.0, 154.9, 145.2, 144.8, 143.7, 141.3, 134.3, 131.8, 128.6, 127.4, 124.2, 121.1, 116.4, 115.2, 111.5, 111.1, 69.3, 68.5, 64.3, 62.4, 59.4, 52.3, 31.8, 31.7, 31.6, 30.8, 29.7, 29.4, 29.3, 29.2, 29.0,

28.9, 26.2, 26.0, 25.9, 22.7, 22.6, 22.5, 14.1, 14.1, 14.0. HRMS-ESI: calculated for  $[M+H]^+$  ( $C_{46}H_{67}O_{11}N_4$ ) :  $m/z$  851.4801, found:  $m/z$  851.4815

**Ethyl 5-(5-(2-methoxy-3-(5-(2-methoxy-3-nitro-5-(octyloxy)benzamido)-1-octyl-4-oxo-1,4-dihydropyridine-3-carboxamido)-5-(octyloxy)benzamido)-1-octyl-4-oxo-1,4-dihydropyridine-3-carboxamido)-1-octyl-4-oxo-1,4-dihydropyridine-3-carboxylate (11g)**

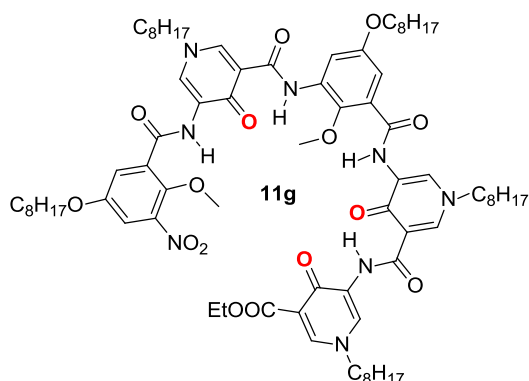

To a solution of **11e** (1.70 g, 2.0 mmol) and **11f** (1.08 g, 2.0 mmol) in  $CH_2Cl_2$  (200 mL) was added  $POCl_3$  (380  $\mu$ L, 4.0 mmol) at 40 °C. The solution was vigorously stirred. After 10 minutes,  $Et_3N$  (840  $\mu$ L, 6.0 mmol) was added into the reaction mixture. The solution was stirred for another 12 hours at

room temperature, which was then concentrated *in vacuo*. The residue was purified by flash column chromatography (MeOH/dichloromethane = 1/50) to produce **11g** as white solid. Yield: 1.74 g, 63%.  $^1H$  NMR (500 MHz,  $CDCl_3/DMSO-d_6 = 4/1$ )  $\delta$  12.67 (s, 1H), 12.52 (s, 1H), 10.92 (s, 1H), 10.89 (s, 1H), 8.91 (s, 1H), 8.89 (s, 1H), 8.82 (s, 1H), 8.43 (s, 1H), 8.32 (s, 1H), 8.23 (d,  $J = 2.5$  Hz, 1H), 8.07 (s, 1H), 7.73 (d,  $J = 2.9$  Hz, 1H), 7.37 (d,  $J = 3.1$  Hz, 1H), 7.12 (d,  $J = 2.5$  Hz, 1H), 4.12 – 3.86 (m, 14H), 1.90 – 1.69 (m, 10H), 1.42 – 1.10 (m, 53H), 0.84 – 0.78 (m, 15H).  $^{13}C$  NMR (125 MHz,  $CDCl_3/DMSO-d_6 = 4/1$ )  $\delta$  168.7, 168.3, 167.5, 164.1, 164.0, 162.9, 162.7, 162.4, 161.3, 155.4, 154.3, 145.4, 144.0, 142.2, 142.0, 141.5, 141.1, 133.7, 133.0, 131.9, 131.4, 131.0, 129.5, 128.7, 128.7, 128.2, 127.6, 126.8, 126.4, 125.4, 121.0, 115.7, 115.1, 114.5, 113.6, 111.7, 109.2, 69.0, 68.2, 64.4, 62.6, 59.9, 59.0, 58.9, 58.4, 31.7, 31.6, 31.5, 30.7, 30.5, 29.4, 29.2, 29.1, 29.1, 29.0, 28.9, 28.8, 26.0, 25.9, 25.7, 22.5, 22.4, 22.4, 14.2, 14.1, 14.0. HRMS-ESI: calculated for  $[M+Na]^+$  ( $C_{76}H_{110}O_{15}N_8Na$ ) :  $m/z$  1397.7983, found:  $m/z$  1397.7931.



## Compound 11

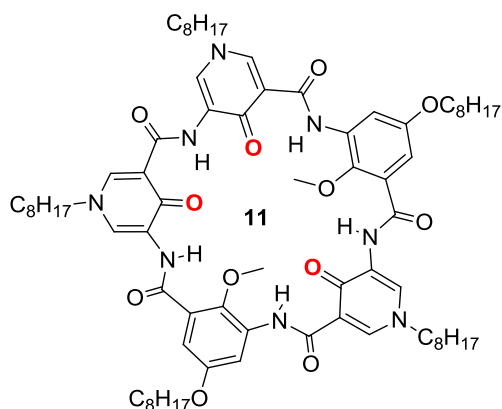

To a solution of **11g** (0.69 g, 0.50 mmol) and iron (0.14 g, 2.50 mmol) in EtOH (50 mL) and THF (50 mL) was added acetate acid (1.00 mL). The solution was refluxed for 5 hours. After cooling, the solvent was filtered and removed then the residue was dissolved in CH<sub>2</sub>Cl<sub>2</sub> (50 mL) and washed with water (3 × 100 mL). The organic layer was dried over Na<sub>2</sub>SO<sub>4</sub>. The solvent was removed and the amine product was dissolved into dioxane (50 mL). 1M of KOH (1.00 mmol, 1.00 mL) was added to the solution and refluxed for 5 hours. After quenching with water (30 mL), the aqueous layer was neutralized by addition 1M HCl (1.00 mL). The mixture was extracted with CH<sub>2</sub>Cl<sub>2</sub>. The organic extract was dried over NaSO<sub>4</sub> and concentrated under reduced pressure. To the solution of the residue in dry CH<sub>2</sub>Cl<sub>2</sub> (20 mL) was added BOP (0.66 g, 1.50 mmol) and DIEA (0.26 mL, 2.00 mmol). The solution was stirred at room temperature for 12 hours at room temperature. The solution was washed with HCl solution. After removal of the solvent, the residue was purified by flash column chromatography on silica gel using MeOH/CH<sub>2</sub>Cl<sub>2</sub> as the eluent to give the product **11**, three-step total yield: 253 mg, 39%. <sup>1</sup>H NMR (500 MHz, CDCl<sub>3</sub>/DMSO-*d*<sub>6</sub> = 1/9, 350K) δ 13.21 (s, 1H), 13.10 (s, 1H), 12.99 (s, 1H), 11.47 (s, 1H), 11.41 (s, 1H), 8.85 (s, 1H), 8.73 (s, 1H), 8.71 (s, 1H), 8.39 (s, 1H), 8.32 (s, 2H), 8.26 (s, 1H), 8.22 (s, 1H), 7.11 (s, 2H), 4.15 – 4.14 (m, 6H), 4.01 – 4.05 (m, 10H), 1.82 – 1.93 (m, 10H), 1.54 – 1.50 (m, 4H), 1.49 – 1.23 (m, 46H), 0.94 – 0.81 (m, 15H). <sup>13</sup>C NMR (125 MHz, CDCl<sub>3</sub>/DMSO-*d*<sub>6</sub> = 1/9, 350K) δ 168.6, 168.2, 162.6, 162.2, 162.1, 161.6, 161.4, 155.0, 154.9, 141.8, 141.7, 140.1, 139.9, 139.8, 133.6, 133.6, 132.3, 132.2, 131.7, 126.1, 126.0, 125.5, 124.4, 123.7, 115.2, 114.8, 114.6, 111.0, 110.4, 108.3, 67.9, 67.8, 63.9, 63.4, 58.8, 58.7, 58.7, 31.5, 31.5, 31.4, 31.3, 30.3, 30.2, 29.4, 29.3, 29.2, 29.0, 28.9, 28.8, 28.7, 28.7, 28.6, 26.1, 26.0, 22.3, 22.2, 13.7, 13.6. HRMS-ESI: calculated for [M+Na]<sup>+</sup> (C<sub>74</sub>H<sub>106</sub>O<sub>12</sub>N<sub>8</sub>Na) : *m/z* 1321.7822, found: *m/z* 1321.7886.

**Ethyl 5-(5-(2-methoxy-3-(2-methoxy-3-nitro-5-(octyloxy)benzamido)-5-(octyloxy)benzamido)-1-octyl-4-oxo-1,4-dihydropyridine-3-carboxamido)-1-octyl-4-oxo-1,4-dihydropyridine-3-carboxylate (12a)**

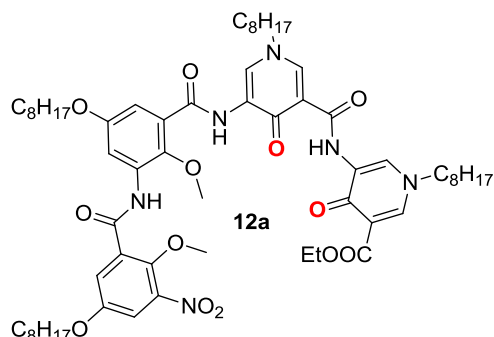

A solution of **10c** (1.80 g, 3.00 mmol) in  $\text{SOCl}_2$  (6.00 mL) was heated under reflux for 2 hours at room temperature. After removal of  $\text{SOCl}_2$ , **11f** (1.63g, 3.00 mmol) and DIEA (1.02 mL, 6.00 mmol) in dry  $\text{CH}_2\text{Cl}_2$  (30 mL) were added to the residue. The solution was allowed to proceed for 12 hours at room temperature. After washing with 1M HCl solution, the organic layer was dried over  $\text{Na}_2\text{SO}_4$ . The organic solvent was removed and the residue was purified by column chromatography on silica gel using  $\text{MeOH}/\text{CH}_2\text{Cl}_2$  as the eluent to give **12a** as a white solid. Yield: 2.91 g, 86%.  $^1\text{H}$  NMR (500 MHz,  $\text{CDCl}_3$ )  $\delta$  12.81 (s, 1H), 10.85 (s, 1H), 10.29 (s, 1H), 9.06 (d,  $J = 2.0$  Hz, 1H), 8.93 (d,  $J = 2.1$  Hz, 1H), 8.43 (d,  $J = 3.0$  Hz, 1H), 8.38 (d,  $J = 2.2$  Hz, 1H), 8.13 (d,  $J = 2.2$  Hz, 1H), 7.91 (d,  $J = 3.3$  Hz, 1H), 7.50 (d,  $J = 3.2$  Hz, 1H), 7.33 (d,  $J = 3.1$  Hz, 1H), 4.41 (q,  $J = 7.1$  Hz, 2H), 4.13 (s, 3H), 4.04 (q,  $J = 6.5$  Hz, 4H), 4.01 – 3.95 (m, 5H), 3.88 (t,  $J = 7.3$  Hz, 2H), 1.97 – 1.75 (m, 8H), 1.52 – 1.19 (m, 43H), 0.90 – 0.85 (m, 12H).  $^{13}\text{C}$  NMR (125 MHz,  $\text{CDCl}_3$ )  $\delta$  168.7, 167.8, 165.8, 163.5, 163.2, 161.7, 155.9, 155.0, 144.8, 144.7, 142.5, 141.7, 133.6, 132.9, 132.3, 129.7, 126.9, 126.6, 125.8, 120.9, 115.6, 115.1, 114.9, 111.9, 110.8, 69.2, 68.6, 64.8, 63.4, 61.2, 59.3, 58.7, 31.8, 31.7, 31.6, 30.7, 30.6, 29.3, 29.2, 29.2, 29.0, 28.9, 28.9, 26.2, 26.1, 25.9, 25.9, 22.6, 22.6, 22.6, 14.4, 14.1, 14.0, 14.0. HRMS-ESI: calculated for  $[\text{M}+\text{Na}]^+$  ( $\text{C}_{62}\text{H}_{90}\text{N}_6\text{O}_{13}\text{Na}$ ):  $m/z$  1149.6458, found:  $m/z$  1149.6496.

**Ethyl-5-(5-(3-(3-(2-fluoro-3-nitrobenzamido)-2-methoxy-5-(octyloxy)benzamido)-2-methoxy-5-(octyloxy)benzamido)-1-octyl-4-oxo-1,4-dihydropyridine-3-carboxamido)-1-octyl-4-oxo-1,4-dihydropyridine-3-carboxylate (12b)**

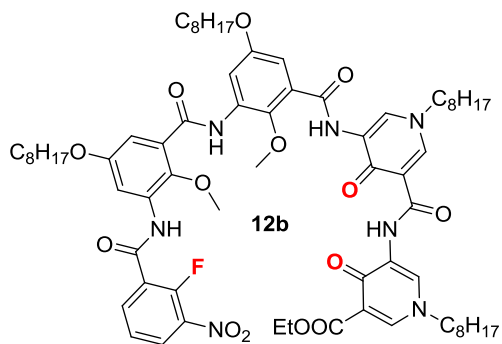

To a solution of **12a** (1.13 g, 1.00 mmol) and iron (0.37 g, 5.00 mmol) in EtOH (20 mL) was added acetate acid (1.00 mL). The solution was refluxed for 2 hours at room temperature. After cooling, the solvent was removed and the residue was dissolved with  $\text{CH}_2\text{Cl}_2$  and washed with water and Brine. The

organic layer was dried over  $\text{Na}_2\text{SO}_4$ . Removal of the solvent gave the amine product, which was used for the next step reaction without further purification. A solution of **1b** (0.37 g, 2.00 mmol) in  $\text{SOCl}_2$  (4.00 mL) was heated under reflux for 2 hours at room temperature. After removal of  $\text{SOCl}_2$ , the amine product and DIEA (0.68 mL, 4.00 mmol) in dry  $\text{CH}_2\text{Cl}_2$  (20 mL) were added to the residue. The solution was allowed to proceed for 12 hours at room temperature. After washing with 1M HCl solution, the organic layer was dried over  $\text{Na}_2\text{SO}_4$ . After removal of the solvent, the residue was purified by flash column chromatography on silica gel using MeOH/ $\text{CH}_2\text{Cl}_2$  as the eluent to give the product **12b**. Yield: 1.12 g, 89%.  $^1\text{H}$  NMR (500 MHz,  $\text{CDCl}_3$ )  $\delta$  12.76 (s, 1H), 11.01 (s, 1H), 10.13 (s, 1H), 9.18 (d,  $J$  = 8.0 Hz, 1H), 9.06 (d,  $J$  = 2.1 Hz, 1H), 8.93 (d,  $J$  = 2.2 Hz, 1H), 8.48 (d,  $J$  = 3.1 Hz, 1H), 8.35 (dd,  $J$  = 9.0, 2.6 Hz, 3H), 8.19 (t,  $J$  = 8.3 Hz, 1H), 8.08 (d,  $J$  = 2.3 Hz, 1H), 7.47 (t,  $J$  = 8.0 Hz, 1H), 7.42 (d,  $J$  = 3.1 Hz, 1H), 7.35 (d,  $J$  = 3.1 Hz, 1H), 4.24 (q,  $J$  = 7.1 Hz, 2H), 4.04 (dd,  $J$  = 12.4, 6.3 Hz, 4H), 4.00 (s, 3H), 3.96 (s, 3H), 3.87 (t,  $J$  = 7.3 Hz, 2H), 2.03 (s, 4H), 1.94 – 1.76 (m, 8H), 1.52– 1.25 (m, 41H), 0.90 - 0.85 (m, 12H).  $^{13}\text{C}$  NMR (125 MHz,  $\text{CDCl}_3$ )  $\delta$  168.8, 167.8, 165.0, 163.4, 163.3, 163.0, 160.1, 156.2, 156.0, 152.1, 142.3, 141.6, 141.3, 140.8, 138.1, 138.0, 136.9, 133.5, 133.2, 132.3, 132.1, 129.0, 126.8, 126.7, 126.6, 125.6, 125.5, 125.4, 124.9, 124.8, 115.5, 114.6, 112.2, 111.8, 111.2, 110.6, 68.7, 68.6, 63.4, 63.3, 60.7, 59.3, 58.8, 31.8, 31.6, 30.7, 30.6, 29.3, 29.2, 29.19, 29.2, 28.9, 28.9, 26.2, 26.1, 25.9, 22.6, 22.5, 14.3, 14.1, 14.0. HRMS-ESI: calculated for  $[\text{M}+\text{Na}]^+$  ( $\text{C}_{69}\text{H}_{94}\text{FN}_7\text{NaO}_{14}$ ):  $m/z$  1286.6735, found:  $m/z$  1286.6750.

## Compound 12

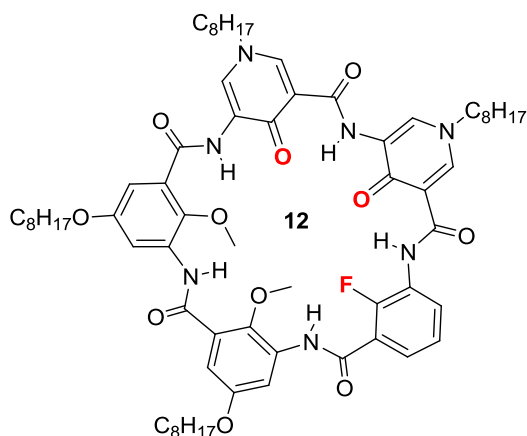

To a solution of **12b** (0.63 g, 0.50 mmol) and iron (0.14 g, 2.50 mmol) in EtOH (50 mL) and THF (50 mL) was added acetate acid (1.00 mL). The solution was refluxed for 5 hours. After cooling, the solvent was filtered and removed then the residue was dissolved in CH<sub>2</sub>Cl<sub>2</sub> (50 mL) and washed with water (3 × 100 mL). The organic layer was dried over Na<sub>2</sub>SO<sub>4</sub>. Removal of the solvent gave the amine product, which was used for the next step reaction without further purification. To a solution of amine in 1,4-dioxane (50 mL), 1M of KOH (1.00 mmol, 1.00 mL) was added and refluxed for 5 hours. After quenching with water (30 mL), the aqueous layer was neutralized by addition 1M HCl (1.00 mL). The mixture was extracted with CH<sub>2</sub>Cl<sub>2</sub> (3 × 50 mL). The organic extracts were dried over NaSO<sub>4</sub> and concentrated under reduced pressure. To the solution of the residue in dry CH<sub>2</sub>Cl<sub>2</sub> (20 mL), BOP (0.66 g, 1.50 mmol) and DIEA (0.26 mL, 2.00 mmol) were added. The solution was stirred at room temperature for 12 hours at room temperature. The solution was washed with 1M HCl solution. After removal of the solvent, the residue was purified by flash column chromatography on silica gel using MeOH/CH<sub>2</sub>Cl<sub>2</sub> as the eluent to give the product **12**, three-step total yield: 0.28 g, 42%. <sup>1</sup>H NMR (500 MHz, CDCl<sub>3</sub>/DMSO-*d*<sub>6</sub> = 4/1) δ 13.01 (s, 1H), 12.80 (s, 1H), 11.23 (s, 1H), 10.77 (s, 1H), 9.10 (d, *J* = 19.9 Hz, 1H), 8.77 (s, 1H), 8.61 (s, 1H), 8.49 (s, 1H), 8.22 (s, 1H), 8.02 (s, 1H), 7.93 (s, 1H), 7.62 (s, 1H), 7.09 (d, *J* = 21.6 Hz, 2H), 6.86 (s, 1H), 4.08 – 3.93 (m, 14), 1.93 (s, 4H), 1.86 – 1.77 (m, 4H), 1.53 – 1.51 (m, 4H), 1.44 – 1.20 (m, 37H), 0.89-0.82 (m, 12H). <sup>13</sup>C NMR (125 MHz, CDCl<sub>3</sub>/DMSO-*d*<sub>6</sub> = 4/1) δ 168.6, 168.0, 162.5, 162.4, 161.4, 160.9, 159.6, 155.3, 155.2, 151.3, 149.3, 141.1, 140.6, 140.2, 134.0, 139.9, 133.2, 132.4, 132.2, 131.6, 128.2, 128.1, 126.6, 125.9, 124.5, 124.4, 124.3, 124.2, 123.8, 123.7, 121.1, 119.4, 119.4, 115.2, 114.4, 110.8, 110.5, 109.3, 109.3, 109.2, 108.7, 108.6, 68.1, 67.9, 64.04, 63.4, 63.4, 59.2, 59.1, 37.5, 37.4, 31.8, 31.8, 31.6, 31.6, 30.5, 30.4, 29.5, 29.3, 29.3, 29.0, 26.3, 26.2,

26.1, 22.6, 22.5, 22.4, 14.1, 13.9. HRMS-ESI: calculated for  $[M+Na]^+$  ( $C_{67}H_{90}FN_7NaO_{11}$ ):  $m/z$  1210.6575, found:  $m/z$  1210.6573.

**Ethyl 5-(2-methoxy-3-(5-(2-methoxy-3-nitro-5-(octyloxy)benzamido)-1-octyl-4-oxo-1,4-dihydropyridine-3-carboxamido)-5-(octyloxy)benzamido)-1-octyl-4-oxo-1,4-dihydropyridine-3-carboxylate (13b)**

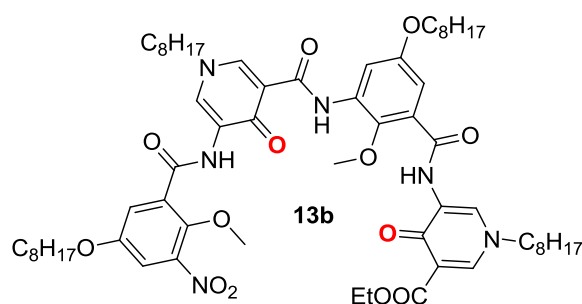

Compound **11e** (2.55 g, 3.00 mmol) was dissolved in  $CH_2Cl_2$  (20 mL) to which ethyl chloroformate (0.33 mL, 3.30 mmol) was added at 0 °C. The reaction mixture was stirred for at least 15 mins after which a solution of **13a**

(1.18 g, 4.00 mmol) and NMM (0.33 mL, 3.30 mmol) in  $CH_2Cl_2$  (20 mL) were added. The reaction mixture was allowed to stir continuously for 12 hours at room temperature. The reaction mixture was washed with 1 M HCl and Brine. Drying over  $Na_2SO_4$  and removal of solvent in *vacuo* gave the crude product and it was purified by flash column chromatography on silica gel using MeOH/ $CH_2Cl_2$  as the eluent to give the product **13b**. Yield: 2.20 g, 65.0%.  $^1H$  NMR (500 MHz,  $CDCl_3$ )  $\delta$  12.58 (s, 1H), 11.16 (s, 1H), 10.91 (s, 1H), 9.06 (d,  $J = 2.1$  Hz, 1H), 9.01 (d,  $J = 2.2$  Hz, 1H), 8.50 (d,  $J = 2.2$  Hz, 1H), 8.39 (d,  $J = 3.1$  Hz, 1H), 8.17 (d,  $J = 2.2$  Hz, 1H), 7.85 (d,  $J = 3.2$  Hz, 1H), 7.49 (d,  $J = 3.3$  Hz, 1H), 7.35 (d,  $J = 3.1$  Hz, 1H), 4.42 (q,  $J = 7.1$  Hz, 2H), 4.13 (s, 3H), 4.06 – 3.98 (m, 9H), 3.90 (t,  $J = 7.3$  Hz, 2H), 1.83 (m, 10H), 1.50 – 1.16 (m, 41H), 0.91– 0.86 (m, 12H).  $^{13}C$  NMR (125 MHz,  $CDCl_3$ )  $\delta$  169.0, 167.9, 165.4, 163.7, 162.6, 162.0, 155.6, 154.8, 145.2, 144.9, 142.7, 142.6, 141.4, 133.6, 133.4, 131.7, 128.8, 127.4, 126.2, 125.5, 120.9, 116.2, 115.0, 114.4, 112.5, 110.2, 69.2, 68.6, 64.6, 62.7, 62.6, 61.2, 59.3, 58.9, 31.8, 31.7, 31.6, 30.8, 30.7, 29.7, 29.3, 29.2, 29.1, 29.0, 28.9, 28.9, 26.2, 25.9, 25.8, 22.6, 22.6, 22.5, 14.4, 14.1, 14.0, 14.0.

**Ethyl 5-(3-(5-(3-(2-fluoro-3-nitrobenzamido)-2-methoxy-5-(octyloxy)benzamido)-1-octyl-4-oxo-1,4-dihydropyridine-3-carboxamido)-2-methoxy-5-(octyloxy)benzamido)-1-octyl-4-oxo-1,4-dihydropyridine-3-carboxylate (13c)**

### 1-octyl-4-oxo-1,4-dihydropyridine-3-carboxylate (**13c**)

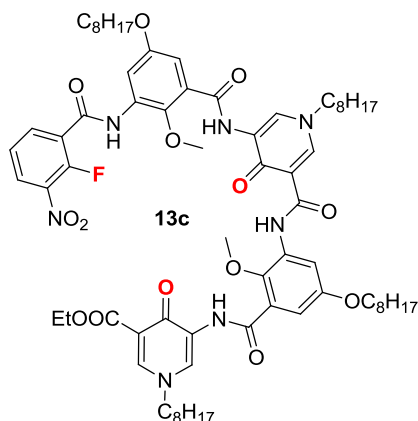

To a solution of **13b** (2.25 g, 2.00 mmol) and iron (0.56 g, 10 mmol) in EtOH (100 mL) was added acetate acid (2.00 mL). The solution was refluxed for 2 hours at room temperature. After cooling, the solvent was removed and the residue was dissolved with CH<sub>2</sub>Cl<sub>2</sub> and washed with water and Brine. The organic layer was dried over Na<sub>2</sub>SO<sub>4</sub>. Removal of the solvent gave the amine product, which was used

for the next step reaction without further purification. A solution of **1b** (0.55 g, 3.00 mmol) in SOCl<sub>2</sub> (3.00 mL) was heated under reflux for 2 hours at room temperature. After removal of SOCl<sub>2</sub>, the amine product and DIEA (1.00 mL, 6.00 mmol) in dry CH<sub>2</sub>Cl<sub>2</sub> (20 mL) were added into the residue. The solution was allowed to proceed for 12 hours at room temperature. After washing with 1M HCl solution, the organic layer was dried over Na<sub>2</sub>SO<sub>4</sub>. After removal of the solvent, the residue was purified by flash column chromatography on silica gel using MeOH/CH<sub>2</sub>Cl<sub>2</sub> as the eluent to give the product **13c**. Yield: 2.07 g, 82%. <sup>1</sup>H NMR (300 MHz, CDCl<sub>3</sub>) δ 12.62 (s, 1H), 10.99 (s, 1H), 10.92 (s, 1H), 9.58 (s, 1H), 8.99 – 8.91 (m, 2H), 8.39 (s, 1H), 8.34 (d, *J* = 3.2 Hz, 1H), 8.21 (t, *J* = 6.7 Hz, 1H), 8.13 – 7.97 (m, 3H), 7.40 (t, *J* = 8.0 Hz, 1H), 7.30 (d, *J* = 2.9 Hz, 2H), 4.17 (q, *J* = 7.2 Hz, 2H), 4.04 – 3.85 (m, 14H), 1.93 – 1.71 (m, 8H), 1.46 – 1.22 (m, 43H), 0.89 – 0.82 (m, 12H). <sup>13</sup>C NMR (125 MHz, CDCl<sub>3</sub>) δ 168.8, 168.7, 167.6, 163.7, 163.6, 163.0, 162.9, 162.8, 162.7, 162.5, 160.8, 143.1, 143.0, 142.4, 142.3, 142.1, 140.7, 137.5, 137.4, 137.4, 136.4, 133.6, 132.8, 132.7, 132.1, 131.8, 128.0, 126.8, 126.3, 126.2, 126.1, 125.3, 125.2, 124.8, 124.7, 124.6, 124.5, 115.6, 115.5, 113.7, 113.4, 113.3, 112.2, 111.4, 109.6, 109.6, 68.4, 68.3, 62.7, 62.7, 62.4, 60.3, 59.2, 58.8, 31.7, 31.5, 30.6, 30.5, 29.2, 29.1, 29.1, 28.8, 26.1, 26.0, 25.9, 25.8, 22.0, 22.4, 14.1, 13.9, 13.8. HRMS-ESI: calculated for [M+Na]<sup>+</sup> (C<sub>69</sub>H<sub>94</sub>FN<sub>7</sub>NaO<sub>14</sub>): *m/z* 1286.6735, found: *m/z* 1286.6728.

### Compound 13

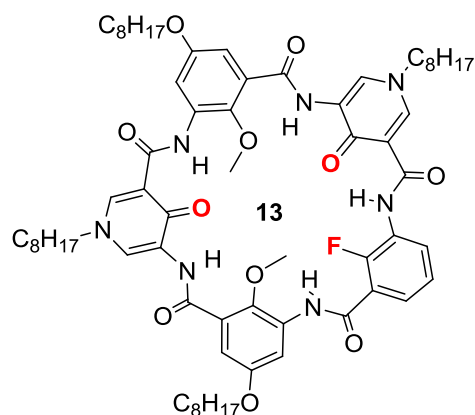

To a solution of **13c** (0.63 g, 0.50 mmol) and iron (0.14 g, 2.50 mmol) in EtOH (50 mL) and THF (50 mL) was added acetate acid (1.00 mL). The solution was refluxed for 5 hours. After cooling, the solvent was filtered and removed then the residue was dissolved in CH<sub>2</sub>Cl<sub>2</sub> (50 mL) and washed with water (3 × 100 mL). The organic layer was dried over Na<sub>2</sub>SO<sub>4</sub>. Removal of the solvent gave the amine product, which was used for the next step reaction without further purification. To a solution of amine in dioxane (50 mL), 1M of KOH (1.00 mmol, 1.00 mL) was added and refluxed for 5 hours. After quenching with water (30 ml), the aqueous layer was neutralized by addition of 1M HCl (1.00 mL). The mixture was extracted with CH<sub>2</sub>Cl<sub>2</sub>. The organic extracts were dried over NaSO<sub>4</sub> and concentrated under reduced pressure. To the solution of the residue in dry CH<sub>2</sub>Cl<sub>2</sub> (20 mL), BOP (0.66 g, 1.50 mmol) and DIEA (0.26 mL, 2.00 mmol) were added. The solution was stirred at room temperature for 12 hours at room temperature. The solution was washed with 1M HCl solution. After removal of the solvent, the residue was purified by flash column chromatography on silica gel using MeOH/CH<sub>2</sub>Cl<sub>2</sub> as the eluent to give the product **13**, three-step total yield: 243 mg, 41%. <sup>1</sup>H NMR (500 MHz, CDCl<sub>3</sub>) δ 13.15 (s, 1H), 13.10 (s, 1H), 11.40 (s, 1H), 11.31 (s, 1H), 9.37 (d, *J* = 21.6 Hz, 1H), 8.69 (s, 2H), 8.54 (s, 1H), 8.19 (s, 1H), 8.15 (s, 1H), 8.10 (s, 1H), 8.08 (s, 1H), 7.74 (t, *J* = 7.5 Hz, 1H), 7.21 – 7.16 (m, 2H), 7.13 (s, 1H), 4.12 (s, 6H), 4.03 – 3.96 (m, 4H), 3.96 – 3.86 (m, 4H), 1.92 - 1.91 (m, 4H), 1.88 - 1.82 (m, 4H), 1.47 – 1.24 (m, 40H), 0.96 - 0.89 (m, 12H). <sup>13</sup>C NMR (125 MHz, CDCl<sub>3</sub>) δ 168.6, 168.5, 162.3, 162.1, 161.9, 161.5, 159.7, 155.4, 155.2, 151.4, 149.4, 142.0, 141.3, 139.8, 139.7, 134.0, 132.8, 131.9, 131.4, 131.4, 128.3, 128.2, 126.1, 126.0, 126.0, 124.5, 124.2, 124.1, 123.9, 123.8, 119.4, 119.3, 114.9, 110.9, 110.7, 108.9, 108.3, 68.0, 62.7, 62.4, 59.2, 59.1, 31.8, 31.6, 31.6, 30.6, 30.1, 29.5, 29.4, 29.3, 29.2, 29.2, 29.1, 29.0, 26.4, 26.3, 26.1, 26.04 22.6, 22.5, 22.5, 22.4, 14.0, 13.9. HRMS-ESI: calculated for

$[M+Na]^+$  ( $C_{67}H_{90}FN_7NaO_{11}$ ):  $m/z$  1210.6575, found:  $m/z$  1210.6573.

#### Pentamer 14

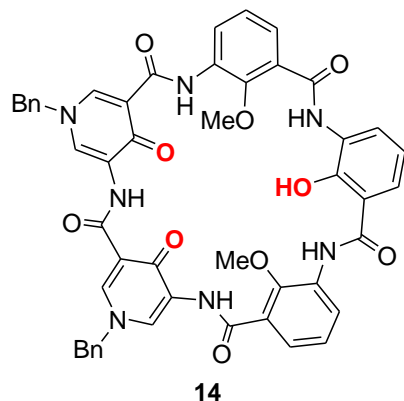

Pentamer **6a** (293 mg, 0.3mmol) was reduced by catalytic hydrogenation in THF (90 mL) at 60 °C, using 10% Pd/C (30 mg, 10%) as the catalyst for 4 hours. The reaction mixture was then filtered and the solvent removed in *vacuo* and washed with ether to give the green solid pentamer **14**. Yield: 159 mg, 60%. HRMS-ESI: calculated for  $[M]^-$  ( $C_{49}H_{39}N_7O_{10}$ ):  $m/z$  884.2686, found:  $m/z$  884.2691.

#### Pentamer 15

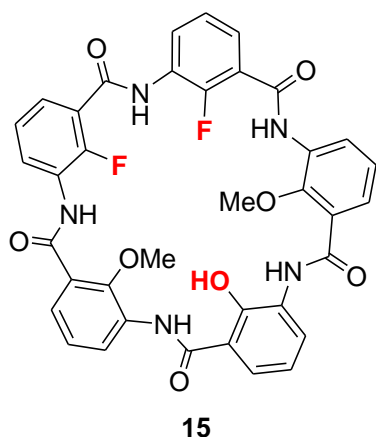

Pentamer **6b** (80 mg, 0.1 mmol) was reduced by catalytic hydrogenation in THF (30 mL) at 60 °C, using 10% Pd/C (8 mg, 10%) as the catalyst for 48 hours. The reaction mixture was then filtered and the solvent removed in *vacuo* and washed with ether to give the green solid pentamer **15**. Yield: 42 mg, 60%. HRMS-ESI: calculated for  $[M]^-$  ( $C_{37}H_{26}F_2N_5O_8$ ):  $m/z$  706.1755, found:  $m/z$  706.1765.

#### Pentamer 16e

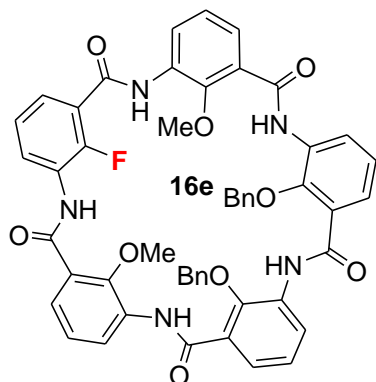

To a solution of **5e** (473 mg, 0.50 mmol) and iron (112 mg, 2.0 mmol) in EtOH/THF (5 mL/2 mL) was added acetate acid (1.0 mL). The reaction was refluxed for 3 hours. After cooling, the solvent was removed and the residue was dissolved with  $CH_2Cl_2$  and washed with water and Brine. The organic layer was dried over  $Na_2SO_4$ . After removal of the solvent, the residue was not purified, but used directly in the next step. To the solution of residue in hot dioxane (1.5 mL) was added 1M KOH (1.0



mL). The reaction was heated under reflux for 4 hours. After quenching with water (15 mL), the aqueous layer was neutralized by addition 1M HCl (1.5 mL). The mixture was extracted with CHCl<sub>3</sub> (3x15 mL). The organic extracts were dried over Na<sub>2</sub>SO<sub>4</sub> and concentrated under reduced pressure. To the solution of the residue in dry CH<sub>2</sub>Cl<sub>2</sub> (10 mL) was added BOP (0.55 g, 2.5 mmol) and DIEA (0.25 mL). The reaction was stirred in room temperature for 6 hours. The reaction was washed with HCl solution, aqueous sat. NaHCO<sub>3</sub> and Brine. After removal of the solvent, the residue was purified by flash column chromatography on silica gel using CH<sub>2</sub>Cl<sub>2</sub>/ethyl acetate (20/1 v/v) as the eluent to give the product **16e**, three-step total yield: 230 mg, 52%. <sup>1</sup>H NMR (500 MHz, CDCl<sub>3</sub>): δ 10.53 (d, 1H, *J* = 4.1 Hz), 10.42 (s, 1H), 10.36 (s, 1H), 10.20 (s, 1H), 9.52 (d, 1H, *J* = 19.3 Hz), 8.98 (td, 1H, *J* = 8.0, 1.5 Hz), 8.91 (ddd, 2H, *J* = 11.2, 8.1, 1.6 Hz), 8.84 (dd, 1H, *J* = 8.1, 1.5 Hz), 8.82 (dd, 1H, *J* = 8.1, 1.6 Hz), 8.05 (td, 1H, *J* = 7.9, 1.6 Hz), 7.95 (ddd, 2H, *J* = 10.9, 7.9, 1.6 Hz), 7.89 (dd, 1H, *J* = 7.9, 1.6 Hz), 7.82 (dd, 1H, *J* = 7.9, 1.6 Hz), 7.48 (t, 1H, *J* = 8.0 Hz), 7.45 – 7.37 (m, 4H), 7.18 – 7.07 (m, 4H), 7.06 – 6.90 (m, 6H), 5.08 (d, 1H, *J* = 11.2 Hz), 5.02 (q, 2H, *J* = 11.2 Hz), 4.91 (d, 1H, *J* = 11.2 Hz), 3.86 (s, 3H), 3.80 (s, 3H). <sup>13</sup>C NMR (126 MHz, CDCl<sub>3</sub>): δ 162.82, 162.58, 162.41, 162.09, 160.24, 151.58, 149.74, 146.54, 146.44, 145.21, 145.19, 133.74, 133.71, 133.16, 133.14, 132.56, 132.13, 129.51, 129.43, 129.36, 129.21, 128.49, 127.74, 127.64, 127.19, 126.90, 126.46, 126.36, 126.33, 126.22, 126.16, 126.01, 125.95, 125.90, 125.47, 125.09, 124.42, 124.28, 123.79, 123.69, 120.37, 79.94, 79.90, 62.75, 62.64. HRMS-ESI: calculated for [M]<sup>+</sup>(C<sub>51</sub>H<sub>40</sub>FO<sub>9</sub>N<sub>5</sub>)<sup>+</sup>: *m/z* 884.2737, found: *m/z* 884.2698.

### Pentamer 16

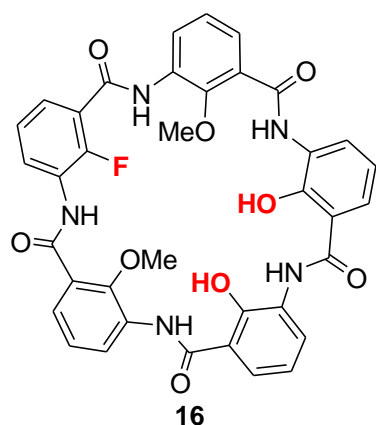

Pentamer **16e** (265 mg, 0.3mmol) was reduced by catalytic hydrogenation in THF (90 mL) at 60 °C, using 10% Pd/C (53 mg, 20%) as the catalyst for 12 hours at room temperature. The reaction mixture was then filtered and the solvent removed in *vacuo* and washed with ether to give the green solid pentamer **16**. Yield: 90 mg, 42%. <sup>1</sup>H NMR (500 MHz, DMSO-*d*<sub>6</sub>:CDCl<sub>3</sub>): δ 11.71 (s, 1H), 11.01

(s, 1H), 10.92 (s, 1H), 10.74 (s, 1H), 10.31 (bs, 1H), 9.63 (d, 1H,  $J = 17.9$  Hz), 8.81 (d, 1H,  $J = 7.9$  Hz), 8.73 (t, 1H,  $J = 7.2$  Hz), 8.66 – 8.57 (m, 2H), 8.55 (d, 1H,  $J = 7.3$  Hz), 8.02 – 7.69 (m, 5H), 7.67 (d, 1H,  $J = 7.5$  Hz), 7.33–7.26 (m, 3H), 7.11 (q, 2H,  $J = 8.0$  Hz), 4.07 (s, 6H).  $^{13}\text{C}$  NMR (126 MHz, DMSO- $d_6$ :CDCl $_3$ ):  $\delta$  163.72, 163.42, 162.42, 161.99, 160.30, 151.93, 149.99, 147.56, 147.15, 144.52, 143.81, 133.45, 132.33, 132.30, 132.01, 127.84, 127.74, 126.39, 126.34, 125.83, 125.64, 125.61, 125.52, 125.48, 125.28, 125.18, 125.13, 124.94, 124.80, 124.53, 124.32, 124.19, 123.19, 122.65, 122.61, 63.30, 63.14. HRMS-ESI: calculated for  $[\text{M}]^-$  (C $_{51}$ H $_{27}$ FN $_5$ O $_9$ ) $^-$ :  $m/z$  704.1798, found:  $m/z$  704.1803.

**Methyl 3-(2-(benzyloxy)-3-(2-(benzyloxy)-3-(2-(methoxy)-3(2-(benzyloxy)-3-nitrobenzamido)benzamido)benzamido)benzamido)-2- methoxybenzoate (17d)**

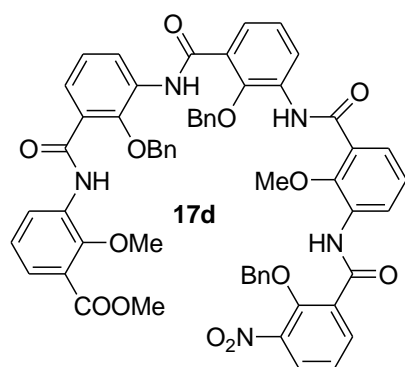

To a solution of **1f** (1.5 g, 1.9 mmol) and iron (410 mg, 7.4 mmol) in EtOH (20 mL) was added acetate acid (2 mL). The reaction was refluxed for 2 hours at room temperature. After cooling, the solvent was removed and the residue was dissolved with CH $_2$ Cl $_2$  and washed with water and Brine. The organic layer was dried over Na $_2$ SO $_4$ . Removal of the solvent gave the amine product

used for the next step reaction without further purification. Acid **1k** (628 mg, 2.3 mmol) was dissolved in CH $_2$ Cl $_2$  (20 mL) to which DMF (0.06 mL), (COCl) $_2$  (0.6 mL, 4.6 mmol) was added at room temperature. The reaction mixture was stirred for 5 hours then the excess (COCl) $_2$  was removed in vacuo to produce the chloride compound. The amine product (1.53 g, 1.9 mmol) and TEA (0.4 mL, 6.9 mmol) in dry CH $_2$ Cl $_2$  (60 mL) were added to the residue. The reaction was allowed to proceed for 4 h. After washing with HCl solution, aqueous sat. NaHCO $_3$  and Brine, the organic layer was dried over Na $_2$ SO $_4$ . The residue was recrystallized from methanol to give the pure product **17d** as a white solid. Yield: 1.05 g, 55%.  $^1\text{H}$  NMR (500 MHz, CDCl $_3$ ):  $\delta$  9.81 (s, 1H), 9.67 (s, 1H), 9.33 (s, 1H), 9.20 (s, 1H), 8.79 - 8.76 (m, 2H), 8.70 (d, 2H,  $J = 8.2$  Hz), 8.35 (dd, 1H,  $J = 8.2, 1.9$  Hz), 8.06 (dd, 1H,  $J = 8.2, 1.9$ Hz), 7.86 - 7.82 (m, 2H), 7.62 - 7.58 (m, 2H), 7.5 (t, 1H,  $J = 8.2$  Hz), 7.39 - 7.32 (m, 3H), 7.21 - 7.13 (m,

6H), 7.12 - 7.01 (m, 7H), 6.95 - 6.89 (m, 3H), 5.11 (s, 2H), 4.83 (s, 2H), 4.79 (s, 2H), 3.90 (s, 3H), 3.60 (s, 3H), 3.27 (s, 3H);  $^{13}\text{C}$  NMR (125 MHz,  $\text{CDCl}_3$ )  $\delta$  165.8, 163.5, 163.3, 162.9, 161.9, 149.4, 149.2, 147.2, 146.0, 145.6, 144.9, 136.0, 134.5, 133.9, 132.8, 132.4, 131.4, 131.1, 130.8, 129.5, 129.3, 128.9, 128.9, 128.8, 128.8, 128.6, 128.5, 128.4, 128.4, 128.0, 127.5, 126.8, 126.4, 126.2, 126.1, 125.8, 125.6, 125.5, 125.4, 125.4, 124.8, 124.6, 124.5, 124.4, 124.1, 123.4, 80.3, 78.8, 78.6, 65.8, 62.4, 62.0; MS-ESI: calculated for  $[\text{M}]^-(\text{C}_{59}\text{H}_{48}\text{N}_5\text{O}_{13})$ : m/z 1034.3254, found: m/z 1034.3219.

### Pentamer **17e**

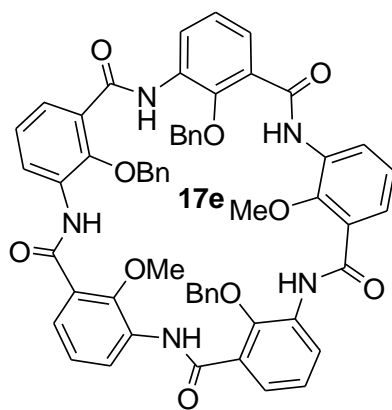

To a solution of **17d** (600 mg, 0.58 mmol) and iron (130 mg, 2.32 mmol) in EtOH (6 mL) was added acetate acid (0.6 mL). The reaction was refluxed for 2 hours at room temperature. The reaction was dissolved with  $\text{CH}_2\text{Cl}_2$  and washed with water and Brine. The organic layer was dried over  $\text{Na}_2\text{SO}_4$ . After removal of the solvent, the residue was not purified, but used directly in the next step.

To the solution of residue in hot methanol (10 mL) was added 1M NaOH (1.2 mL). The reaction was heated under reflux for 2 hours at room temperature. After quenching with water (10 mL), the aqueous layer was neutralized by addition 1M HCl (1.2 mL). The mixture was extracted with  $\text{CH}_2\text{Cl}_2$ . The organic extracts were dried over  $\text{Na}_2\text{SO}_4$  and concentrated under reduced pressure. To the solution of the residue in dry  $\text{CH}_2\text{Cl}_2$  (25 mL) was added BOP (774 mg, 1.8 mmol) and DIEA (0.41 mL, 2.4 mmol). The reaction was stirred in room temperature for 6 hours. The reaction was washed with HCl solution, aqueous sat.  $\text{NaHCO}_3$  and brine. After removal of the solvent, the residue was purified by flash column chromatography on silica gel using ethyl acetate /  $\text{CH}_2\text{Cl}_2$  (1/10 v/v) as the eluent to give the product **17e**, three-step total yield: 104 mg, 18%.  $^{13}\text{C}$  NMR (125 MHz,  $\text{CDCl}_3$ )  $\delta$  163.3, 162.9, 162.8, 162.6, 162.5, 162.4, 162.4, 162.3, 162.2, 162.2, 146.5, 146.3, 146.2, 146.1, 145.1, 144.9, 144.9, 144.5, 144.5, 144.3, 134.1, 133.7, 133.6, 133.4, 133.4, 133.3, 133.1, 133.1, 133.1, 133.0, 132.8, 132.8, 132.7, 132.7, 132.4, 132.4, 130.1, 129.7, 129.6, 129.4, 129.3, 129.2,

129.2, 129.1, 128.6, 128.5, 128.5, 128.2, 127.9, 127.9, 127.6, 127.5, 126.7, 126.4, 126.2, 126.2, 126.2, 126.1, 126.1, 126.1, 126.0, 125.9, 125.9, 125.8, 125.8, 125.7, 125.6, 124.1, 124.0, 123.8, 123.6, 123.5, 123.4, 79.9, 79.7, 79.7, 79.7, 79.7, 79.4, 63.6, 63.4, 62.5, 62.4; MS-ESI: calculated for  $[M]^{-}(\text{C}_{58}\text{H}_{46}\text{N}_5\text{O}_{10}^{-})$ :  $m/z$  972.3250, found:  $m/z$  972.3217.

### Pentamer 17

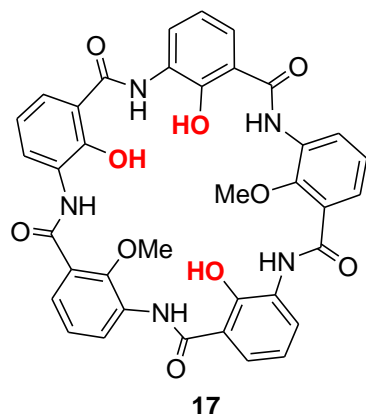

Compound **17e** (130 mg, 0.13 mmol) was reduced by catalytic hydrogenation in THF (25 mL) at 60 °C, using 10% Pd-C (39 mg, 30%) as the catalyst for 48 hours. The reaction mixture was then filtered and the solvent removed in *vacuo* and washed with ether to give the green solid pentamer **17**. Yield: 66%.  $^1\text{H}$  NMR (500 MHz,  $d_6$ -DMSO:CDCl<sub>3</sub> = 10:1):  $\delta$  11.86 (b, 1H), 11.23 (b, 1H), 11.07 (s, 3H), 8.86 – 8.84 (m, 2H), 8.70 – 8.66 (m, 3H), 7.88 – 7.75 (m, 5H), 7.42 (t, 2H,  $J$

= 7.6 Hz), 7.22 – 7.21 (m, 3H);  $^{13}\text{C}$  NMR (125 MHz,  $d_6$ -DMSO:CDCl<sub>3</sub> = 10:1):  $\delta$  163.1, 162.9, 161.6, 161.5, 147.0, 146.8, 133.2, 132.4, 132.2, 132.0, 126.0, 125.9, 125.5, 125.5, 124.8, 124.8, 124.7, 124.6, 124.5, 124.3, 123.7, 123.3, 123.2, 123.1, 122.8, 122.3, 122.1, 63.1, 63.0; HRMS-ESI: calculated for  $[M+\text{Na}]^{+}(\text{C}_{37}\text{H}_{29}\text{N}_5\text{O}_{10}+\text{Na}^{+})$ : 726.1812  $m/z$ , found: 726.1839  $m/z$ .

### 5-(5-(2-methoxy-3-(2-methoxy-3-(2-methoxy-3-nitro-5-(octyloxy)benzamido)-5-(octyloxy)benzamido)-5-(octyloxy)benzamido)-1-octyl-4-oxo-1,4-dihydropyridine-3-carboxamido)-1-octyl-4-oxo-1,4-dihydropyridine-3-carboxylate (18a)

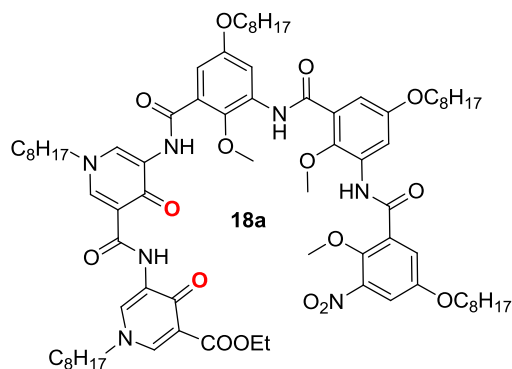

To a solution of **12a** (1.27 g, 1.00 mmol) and iron (0.28 g, 5.00 mmol) in EtOH (20 mL) was added acetate acid (1.00 mL). The solution was refluxed for 2 hours at room temperature. After cooling, the solvent was removed and the residue was dissolved with CH<sub>2</sub>Cl<sub>2</sub> and washed with water and Brine.

The organic layer was dried over Na<sub>2</sub>SO<sub>4</sub>. Removal of the solvent gave the amine product, which was used for the next step reaction without further purification. Acid **7a** (0.65g, 2.00 mmol) in SOCl<sub>2</sub> (2.00 mL) was heated under reflux for 2 hours at room temperature. After removal of SOCl<sub>2</sub>, the amine product and DIEA (0.68 mL, 4.00 mmol) in dry CH<sub>2</sub>Cl<sub>2</sub> (60 mL) were added to the residue. The solution was allowed to proceed for 12 hours at room temperature. After washing with 1M HCl solution, the organic layer was dried over Na<sub>2</sub>SO<sub>4</sub>. The residue was purified by column chromatography on silica gel using MeOH/CH<sub>2</sub>Cl<sub>2</sub> as the eluent to give **18a** as a white solid. Yield: 0.77 g, 74%. <sup>1</sup>H NMR (500 MHz, CDCl<sub>3</sub>) δ 12.78 (s, 1H), 10.93 (s, 1H), 10.32 (s, 1H), 10.11 (s, 1H), 9.05 (d, *J* = 2.3 Hz, 1H), 8.92 (d, *J* = 2.2 Hz, 1H), 8.46 (d, *J* = 3.1 Hz, 1H), 8.43 (d, *J* = 3.1 Hz, 1H), 8.37 (d, *J* = 2.3 Hz, 1H), 8.11 (d, *J* = 2.3 Hz, 1H), 7.93 (d, *J* = 3.2 Hz, 1H), 7.49 (d, *J* = 3.3 Hz, 1H), 7.39 (d, *J* = 3.1 Hz, 1H), 7.32 (d, *J* = 3.1 Hz, 1H), 4.24 (q, *J* = 7.1 Hz, 2H), 4.16 (s, 3H), 4.07 – 4.02 (m, 6H), 3.99 (s, 3H), 3.96 (s, 3H), 3.88 – 3.85 (m, 2H), 1.95 – 1.77 (m, 8H), 1.51 – 1.42 (m, 4H), 1.35 – 1.23 (m, 53H), 0.91 – 0.84 (m, 15H). <sup>13</sup>C NMR (125 MHz, CDCl<sub>3</sub>) δ 168.7, 167.7, 165.2, 163.5, 163.2, 163.1, 161.7, 156.2, 156.0, 154.9, 145.0, 144.4, 142.4, 141.6, 141.3, 140.8, 133.5, 133.3, 132.7, 132.3, 129.8, 126.8, 126.8, 126.6, 125.7, 121.0, 115.6, 115.1, 114.6, 111.8, 111.7, 110.7, 110.5, 69.2, 68.6, 68.6, 64.8, 63.6, 63.2, 60.7, 59.7, 58.7, 31.8, 31.7, 31.6, 30.7, 30.6, 29.6, 29.3, 29.2, 29.2, 29.1, 29.0, 28.9, 26.2, 25.9, 25.8, 22.7, 22.6, 22.5, 14.3, 14.1, 14.0, 13.9. HRMS-ESI: calculated for [M+Na]<sup>+</sup> (C<sub>78</sub>H<sub>113</sub>FN<sub>7</sub>NaO<sub>16</sub>): *m/z* 1326.8136, found: *m/z* 1326.8073.

## Compound 18

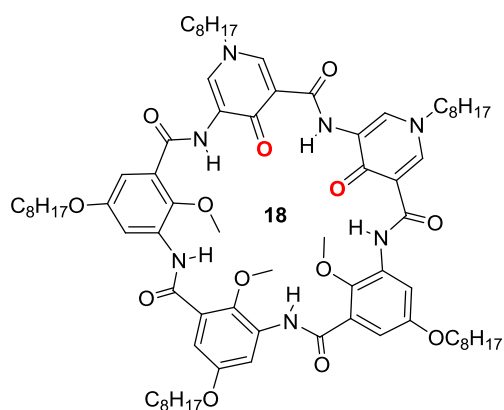

To a solution of **18a** (0.70 g, 0.50 mmol) and iron (0.14 g, 2.50 mmol) in EtOH (50 mL) and THF (50 mL) was added acetate acid (1.00 mL). The solution was refluxed for 5 hours. After cooling, the solvent was filtered and removed then the residue was dissolved with CH<sub>2</sub>Cl<sub>2</sub> (50 mL) and washed with water

(3 × 100 mL). The organic layer was dried over Na<sub>2</sub>SO<sub>4</sub>. Removal of the solvent gave the

amine product, which was used for the next step reaction without further purification. To a solution of amine in dioxane (50 mL), 1M of KOH (1.00 mmol, 1.00 mL) was added and refluxed for 5 hours. After quenching with water (30 mL), the aqueous layer was neutralized by addition of 1M HCl (1.00 mL). The mixture was extracted with CH<sub>2</sub>Cl<sub>2</sub>. The organic extract was dried over NaSO<sub>4</sub> and concentrated under reduced pressure. To the solution of the residue in dry CH<sub>2</sub>Cl<sub>2</sub> (20 mL) was added BOP (0.66 g, 1.50 mmol) and DIEA (0.26 mL, 2.00 mmol). The solution was stirred at room temperature for 12 hours at room temperature. The solution was washed with 1M HCl solution. After removal of the solvent, the residue was purified by flash column chromatography on silica gel using MeOH/CH<sub>2</sub>Cl<sub>2</sub> as eluent to give the product **18**. Yield: 0.30 g, 45%. <sup>1</sup>H NMR (500 MHz, CDCl<sub>3</sub>) δ 13.14 (s, 1H), 13.10 (s, 1H), 11.39 (s, 1H), 11.23 (s, 1H), 11.14 (s, 1H), 8.88 (d, *J* = 1.4 Hz, 1H), 8.86 (d, *J* = 1.4 Hz, 1H), 8.36 (d, *J* = 1.8 Hz, 1H), 8.34 (d, *J* = 2.3 Hz, 1H), 8.31 (s, 1H), 8.29 (s, 2H), 7.31 (d, *J* = 2.8 Hz, 1H), 7.25 (d, *J* = 2.3 Hz, 1H), 7.23 (d, *J* = 2.6 Hz, 1H), 4.25 (s, 3H), 4.16 – 4.05 (m, 10H), 4.01 (s, 3H), 3.92 (s, 3H), 2.03 – 1.98 (m, 4H), 1.92 – 1.83 (m, 6H), 1.55 – 1.50 (m, 6H), 1.48 – 1.25 (m, 44H), 0.91 (m, 15H). <sup>13</sup>C NMR (125 MHz, CDCl<sub>3</sub>) δ 168.9, 168.6, 162.7, 162.4, 162.1, 161.8, 161.4, 155.9, 155.8, 155.6, 141.1, 140.8, 140.6, 140.6, 140.5, 133.5, 133.4, 132.2, 131.9, 127.0, 126.7, 124.6, 124.3, 124.2, 115.7, 115.0, 111.3, 110.7, 109.6, 109.2, 68.4, 68.3, 63.9, 62.9, 62.7, 59.4, 59.2, 31.8, 31.7, 30.7, 30.6, 29.6, 29.5, 29.5, 29.4, 29.3, 29.1, 29.1, 29.0, 26.4, 26.3, 26.2, 26.1, 22.7, 22.6, 14.1, 14.0. HRMS-ESI: calculated for [M+H]<sup>+</sup> (C<sub>76</sub>H<sub>110</sub>N<sub>7</sub>NaO<sub>13</sub>): *m/z* 1328.7178, found: *m/z* 1328.8095.

**Ethyl 5-(2-methoxy-3-(5-(2-methoxy-3-(2-methoxy-3-nitro-5-(octyloxy)benzamido)-5-(octyloxy)benzamido)-1-octyl-4-oxo-1,4-dihydropyridine-3-carboxamido)-5-(octyloxy)benzamido)-1-octyl-4-oxo-1,4-dihydropyridine-3-carboxylate (19a)**

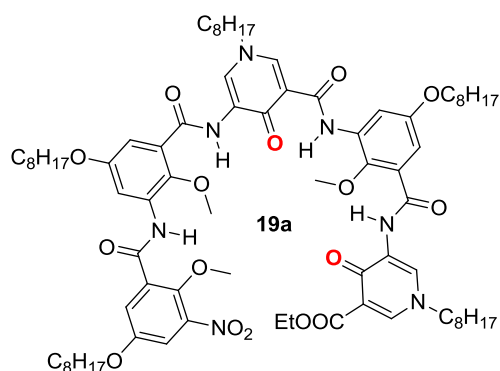

To a solution of **13b** (2.25 g, 2.00 mmol) and iron (0.56 g, 10 mmol) in EtOH (100 mL) was added acetate acid (2.00 mL). The solution was refluxed for 2 hours at room

temperature. After cooling, the solvent was removed and the residue was dissolved with  $\text{CH}_2\text{Cl}_2$  and washed with water and Brine. The organic layer was dried over  $\text{Na}_2\text{SO}_4$ . Removal of the solvent gave the amine product, which was used for the next step reaction without further purification. A solution of **7a** (0.97 g, 3.00 mmol) in  $\text{SOCl}_2$  (3.00 mL) was heated under reflux for 2 hours at room temperature. After removal of  $\text{SOCl}_2$ , the amine product and DIEA (1.00 mL, 6.00 mmol) in dry  $\text{CH}_2\text{Cl}_2$  (20 mL) were added to the residue. The solution was allowed to proceed for 12 hours at room temperature. After washing with 1M HCl solution, the organic layer was dried over  $\text{Na}_2\text{SO}_4$ . After removal of the solvent, the residue was purified by flash column chromatography on silica gel using  $\text{MeOH}/\text{CH}_2\text{Cl}_2$  as eluent to give the product **19a**. Yield: 2.08 g, 74%.  $^1\text{H}$  NMR (500 MHz,  $\text{CDCl}_3$ )  $\delta$  12.73 (s, 1H), 11.13 (s, 1H), 10.90 (s, 1H), 10.41 (s, 1H), 9.07 (s, 1H), 9.00 (d,  $J = 2.1$  Hz, 1H), 8.48 (d,  $J = 2.0$  Hz, 1H), 8.41 (d,  $J = 2.9$  Hz, 1H), 8.37 (d,  $J = 3.1$  Hz, 1H), 8.15 (d,  $J = 2.2$  Hz, 1H), 7.92 (d,  $J = 3.2$  Hz, 1H), 7.48 (d,  $J = 3.2$  Hz, 1H), 7.36 – 7.33 (m, 2H), 4.23 (q,  $J = 7.1$  Hz, 2H), 4.16 (s, 3H), 4.05 – 4.00 (m, 12H), 3.98 (s, 3H), 3.90 (t,  $J = 7.3$  Hz, 2H), 1.96 – 1.85 (m, 4H), 1.85 – 1.74 (m, 8H), 1.50 – 1.41 (m, 4H), 1.39 – 1.22 (m, 45H), 0.90 – 0.86 (m, 15H).  $^{13}\text{C}$  NMR (125 MHz,  $\text{CDCl}_3$ )  $\delta$  168.9, 167.6, 164.6, 163.4, 163.2, 162.6, 161.5, 155.9, 155.5, 154.6, 145.2, 144.0, 142.5, 142.4, 141.7, 140.9, 133.6, 133.1, 132.9, 131.9, 129.6, 128.9, 128.1, 128.0, 126.9, 126.0, 125.7, 125.4, 125.1, 120.9, 115.9, 115.1, 113.9, 112.3, 111.8, 110.6, 109.9, 77.0, 69.1, 68.5, 68.4, 67.8, 64.7, 63.2, 62.5, 60.6, 59.2, 58.9, 31.7, 31.6, 31.5, 29.3, 29.1, 29.0, 28.9, 26.1, 26.1, 25.9, 25.8, 22.5, 22.5, 22.4, 14.2, 14.0, 13.9, 13.8. HRMS-ESI: calculated for  $[\text{M}+\text{Na}]^+$  ( $\text{C}_{78}\text{H}_{113}\text{N}_7\text{NaO}_{16}$ ):  $m/z$  1426.8136, found:  $m/z$  1426.8130.

### Compound 19

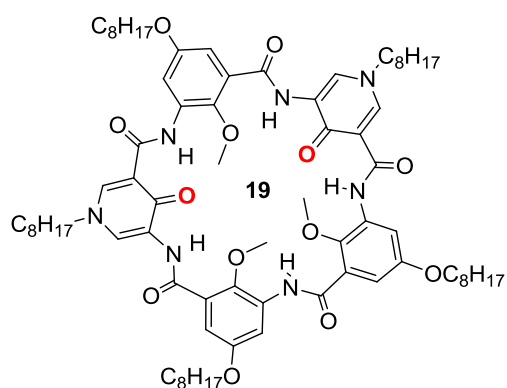

To a solution of **19a** (0.70 g, 0.50 mmol) and iron (0.14 g, 2.50 mmol) in EtOH (50 mL) and THF (50 mL) was added acetate acid (1.00 mL). The solution was refluxed for 5 hours. After cooling, the solvent was filtered

and removed then the residue was dissolved in CH<sub>2</sub>Cl<sub>2</sub> (50 mL) and washed with water (3 × 100 mL). The organic layer was dried over Na<sub>2</sub>SO<sub>4</sub>. Removal of the solvent gave the amine product, which was used for the next step reaction without further purification. To a solution of amine in dioxane (50 mL), 1M of KOH (1.00 mmol, 1.00 mL) was added and refluxed for 5 hours. After quenching with water (30 mL), the aqueous layer was neutralized by addition of 1M HCl (1.00 mL). The mixture was extracted with CH<sub>2</sub>Cl<sub>2</sub>. The organic extract was dried over Na<sub>2</sub>SO<sub>4</sub> and concentrated under reduced pressure. To the solution of the residue in dry CH<sub>2</sub>Cl<sub>2</sub> (20 mL), BOP (0.66 g, 1.50 mmol) and DIEA (0.26 mL, 2.00 mmol) were added. The solution was stirred at room temperature for 12 hours at room temperature. The solution was washed with 1M HCl solution. After removal of the solvent, the residue was purified by flash column chromatography on silica gel using MeOH/CH<sub>2</sub>Cl<sub>2</sub> as eluent to give the product **19**, three-step total yield: 0.21 mg, 35%. <sup>1</sup>H NMR (500 MHz, CDCl<sub>3</sub>) δ 13.06 (s, 1H), 13.02 (s, 1H), 11.33 (s, 1H), 11.23 (s, 1H), 11.00 (s, 1H), 8.71 (s, 1H), 8.60 (s, 1H), 8.32 (s, 1H), 8.22 (s, 1H), 8.15 (s, 1H), 8.06 (s, 1H), 8.00 (s, 1H), 7.21 (s, 1H), 7.09 (s, 1H), 6.96 (s, 1H), 4.05 – 3.80 (m, 19H), 1.89-1.80 (m, 10H), 1.51 – 1.16 (m, 50H), 0.87 – 0.81 (m, 15H). <sup>13</sup>C NMR (125 MHz, CDCl<sub>3</sub>) δ 168.9, 168.8, 162.4, 162.2, 162.1, 161.9, 161.8, 155.6, 155.5, 141.9, 141.6, 141.3, 140.3, 134.2, 133.6, 133.6, 131.9, 131.8, 126.4, 126.2, 124.8, 124.3, 124.2, 115.5, 115.2, 111.3, 111.2, 110.3, 109.3, 108.8, 108.4, 108.3, 68.3, 68.1, 68.0, 63.9, 63.2, 63.1, 62.0, 59.2, 31.8, 31.7, 31.6, 30.7, 30.6, 29.5, 29.4, 29.3, 29.3, 29.2, 29.2, 28.9, 28.8, 26.2, 26.2, 26.1, 26.0, 22.6, 22.5, 14.1, 13.9. MS-ESI: calculated for [M+H]<sup>+</sup> (C<sub>76</sub>H<sub>110</sub>N<sub>7</sub>NaO<sub>13</sub>): *m/z* 1328.7178, found: *m/z* 1328.7.

**Ethyl 5-(2-methoxy-3-(2-methoxy-3-(2-methoxy-3-nitro-5-(octyloxy)benzamido)-5-(octyloxy)benzamido)-5-(octyloxy)benzamido)-1-octyl-4-oxo-1,4-dihydropyridine-3-carboxylate (20a)**

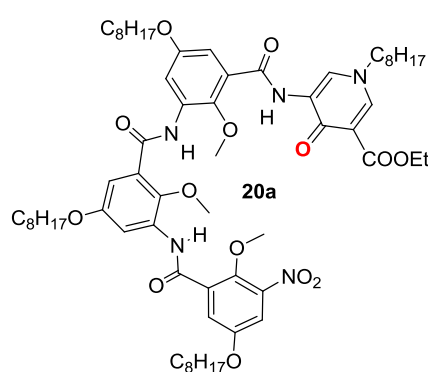

To a solution of **11b** (1.20 g, 2.00 mmol) and iron (0.56 g, 100 mmol) in EtOH (40 mL) was added acetate acid (2.00 mL). The solution was refluxed for



2 hours at room temperature. After cooling, the solvent was removed and the residue was dissolved with CH<sub>2</sub>Cl<sub>2</sub> and washed with water and Brine. The organic layer was dried over Na<sub>2</sub>SO<sub>4</sub>. Removal of the solvent gave the amine product, which was used for the next step reaction without further purification. A solution of **10c** (1.32 g, 2.20 mmol) in SOCl<sub>2</sub> (6.00 mL) was heated under reflux for 2 hours at room temperature. After removal of the SOCl<sub>2</sub>, the amine product (2.00 mmol) and DIEA (0.82 mL, 4.80 mmol) in dry CH<sub>2</sub>Cl<sub>2</sub> (40 mL) were added to the residue. The solution was allowed to proceed for 12 hours at room temperature. After washing with 1M HCl solution, the organic layer was dried over Na<sub>2</sub>SO<sub>4</sub>. After removal of the solvent, the residue was purified by flash column chromatography on silica gel using hexane/ethyl acetate as the eluent to give the product **20a**. Yield: 1.73 g, 75%. <sup>1</sup>H NMR (300 MHz, CDCl<sub>3</sub>) δ 10.98 (s, 1H), 10.18 (s, 2H), 9.01 (d, *J* = 2.4 Hz, 1H), 8.47 (d, *J* = 3.0 Hz, 1H), 8.43 (d, *J* = 3.0 Hz, 1H), 8.17 (d, *J* = 2.4 Hz, 1H), 7.92 (d, *J* = 3.2 Hz, 1H), 7.53 (d, *J* = 3.2 Hz, 1H), 7.42 (d, *J* = 3.1 Hz, 1H), 7.35 (d, *J* = 3.1 Hz, 1H), 4.41 (q, *J* = 7.1 Hz, 2H), 4.09 – 4.03 (m, 9H), 3.94 – 3.88 (m, 8H), 1.89 – 1.78 (m, 8H), 1.64–1.29 (m, 43H), 0.94 – 0.81 (m, 12H). MS-ESI: calculated for [M+Na]<sup>+</sup> (C<sub>64</sub>H<sub>93</sub>N<sub>5</sub>O<sub>14</sub>Na): *m/z* 1178.67 found: *m/z* : 1178.66

**Ethyl 5-(3-(3-(3-(2-fluoro-3-nitro-5-octylbenzamido)-2-methoxy-5-(octyloxy)benzamido)-2-methoxy-5-(octyloxy)benzamido)-2-methoxy-5-(octyloxy)benzamido)-1-octyl-4-oxo-1,4-dihydropyridine-3-carboxylate (20c)**

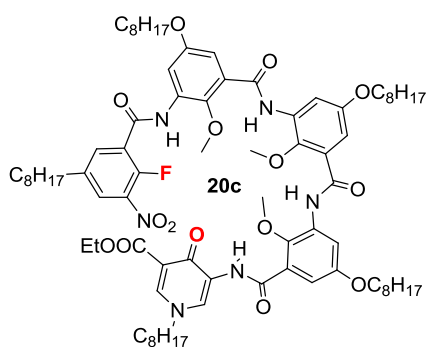

To a solution of **20a** (1.73 g, 1.50 mmol) and iron (0.42 g, 7.50 mmol) in EtOH (30 mL) was added acetate acid (1.50 mL). The solution was refluxed for 2 hours at room temperature. After cooling, the solvent was removed and the residue was dissolved with CH<sub>2</sub>Cl<sub>2</sub> and washed with water and Brine. The

organic layer was dried over Na<sub>2</sub>SO<sub>4</sub>. Removal of the solvent gave the amine product, which was used for the next step reaction without further purification. A solution of **20b** (0.59 g, 2.00 mmol) in SOCl<sub>2</sub> (6.00 mL) was heated under reflux for 2 hours at room

temperature. After removal of the  $\text{SOCl}_2$ , the amine product (1.50 mmol) and DIEA (0.82 mL, 4.80 mmol) in dry  $\text{CH}_2\text{Cl}_2$  (40 mL) were added to the residue. The solution was allowed to proceed for 12 hours at room temperature. After washing with 1M HCl solution, the organic layer was dried over  $\text{Na}_2\text{SO}_4$ . After removal of the solvent, the residue was purified by flash column chromatography on silica gel using hexane/ethyl acetate as the eluent to give the product **20c**. Yield: 1.58g, 75%.  $^1\text{H}$  NMR (500 MHz,  $\text{CDCl}_3$ )  $\delta$  10.98 (s, 1H), 10.35 (s, 1H), 9.97 (s, 1H), 9.10 (d,  $J = 10.8$  Hz, 1H), 9.00 (d,  $J = 2.0$  Hz, 1H), 8.47 (d,  $J = 3.1$  Hz, 1H), 8.46 (d,  $J = 3.1$  Hz, 1H), 8.37 (d,  $J = 3.0$  Hz, 1H), 8.20 (dd,  $J = 5.7, 1.9$  Hz, 1H), 8.13 (d,  $J = 2.1$  Hz, 1H), 7.98 (dd,  $J = 5.7, 1.9$  Hz, 1H), 7.42 (d,  $J = 3.2$  Hz, 1H), 7.41 (d,  $J = 3.1$  Hz, 1H), 7.33 (d,  $J = 3.1$  Hz, 1H), 4.27 (q,  $J = 7.1$  Hz, 2H), 4.06 – 4.01 (m, 6H), 3.97 (s, 3H), 3.94 (s, 3H), 3.92 (s, 3H), 3.90 – 3.89 (m, 2H), 2.72 (t,  $J = 7.5$ , 2H), 1.89 – 1.85 (m, 2H), 1.84 – 1.75 (m, 6H), 1.66 (dt,  $J = 15.4, 7.6$  Hz, 2H), 1.48 – 1.44 (m, 6H), 1.38 – 1.23 (m, 47H), 0.90 – 0.85 (m, 15H).  $^{13}\text{C}$  NMR (125 MHz,  $\text{CDCl}_3$ )  $\delta$  167.9, 164.5, 163.3, 162.9, 162.8, 159.9, 156.2, 156.2, 156.0, 152.4, 150.3, 142.4, 141.5, 141.0, 140.9, 140.5, 140.4, 137.7, 137.6, 137.0, 133.3, 133.1, 132.9, 132.2, 128.8, 126.8, 126.2, 125.5, 124.4, 124.3, 114.1, 111.9, 111.8, 111.6, 111.2, 110.8, 110.5, 68.6, 68.5, 68.5, 63.4, 63.3, 63.1, 60.8, 58.9, 34.8, 31.8, 31.6, 30.8, 30.6, 29.3, 29.2, 29.2, 29.1, 29.1, 29.1, 29.0, 28.9, 28.9, 26.1, 25.9, 22.6, 22.5, 22.5, 14.3, 14.1, 14.0, 13.9. MS-ESI: calculated for  $[\text{M}+\text{Na}]^+$  ( $\text{C}_{79}\text{H}_{113}\text{FN}_6\text{O}_{15}\text{Na}$ ):  $m/z$  1427.81 found:  $m/z$  : 1427.81.

## Compound 20

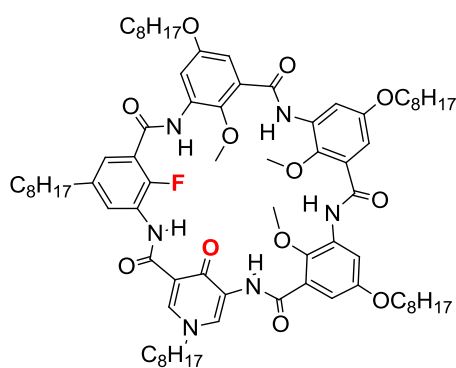

To a solution of **20c** (0.70 g, 0.50 mmol) and iron (0.14 g, 2.50 mmol) in EtOH (50 mL) and THF (50 mL) was added acetate acid (1.00 mL). The solution was refluxed for 5 hours. After cooling, the solvent was filtered and removed then the residue was dissolved in  $\text{CH}_2\text{Cl}_2$  (50 mL) and washed with water ( $3 \times 100$  mL). The organic

layer was dried over  $\text{Na}_2\text{SO}_4$ . The solvent was removed and the residue was dissolve into

dioxane (50 mL). 1M of KOH (1.00 mmol, 1.00 mL) was added to the solution and refluxed for 5 hours. After quenching with water (30 ml), the aqueous layer was neutralized by addition of 1M HCl (1.00 mL). The mixture was extracted with CH<sub>2</sub>Cl<sub>2</sub>. The organic extract was dried over NaSO<sub>4</sub> and concentrated under reduced pressure. To the solution of the residue in dry CH<sub>2</sub>Cl<sub>2</sub> (20 mL) was added BOP (0.66 g, 1.50 mmol) and DIEA (0.26 mL, 2.00 mmol). The solution was stirred at room temperature for 12 hours at room temperature. The organic layer was washed with 1M HCl solution. After removal of the solvent, the residue was purified by flash column chromatography on silica gel using MeOH/CH<sub>2</sub>Cl<sub>2</sub> as the eluent to give the product **20**, three-step total yield: 260 mg, 39%. <sup>1</sup>H NMR (500 MHz, CDCl<sub>3</sub>) δ 13.14 (s, 1H), 11.44 (s, 1H), 11.00 (s, 2H), 9.49 (s, 1H), 8.99 (s, 1H), 8.71 (s, 1H), 8.43 (s, 2H), 8.34 (s, 2H), 7.70 (s, 1H), 7.41 (s, 1H), 7.33 (s, 2H), 4.12 – 3.95 (m, 17H), 2.70 – 2.67 (t, *J* = 7.5 Hz, 2H), 1.98 – 1.95 (m, 2H), 1.85 – 1.81 (m, 6H), 1.69 (dt, *J* = 15.3, 7.7 Hz, 2H), 1.50 – 1.49 (m, 6H), 1.38 – 1.24 (m, 44H), 0.92 – 0.87 (m, 15H). <sup>13</sup>C NMR (125MHz, CDCl<sub>3</sub>) δ 169.1, 162.5, 161.8, 161.6, 160.6, 156.4, 156.4, 150.1, 148.2, 140.7, 140.6, 140.5, 140.4, 140.3, 133.6, 133.3, 132.7, 132.1, 127.9, 127.8, 126.9, 125.3, 125.2, 125.1, 125.0, 124.9, 124.9, 124.7, 124.4 119.2 119.1, 115.5, 111.6, 111.0, 110.7, 110.4, 110.2 110, 68.6 68.5, 63.7, 63.1, 62.9, 59.5, 35.8 31.8, 31.8, 31.6, 31.2, 30.7 29.6, 29.4, 29.4 29.3, 29.2, 29.0, 26.2, 26.0, 22.7 22.6, 22.5, 14.1, 14.0.

## X-ray Crystal Data Sheet for 2, 5, 6 and 14

|                                   |                                             |                                |
|-----------------------------------|---------------------------------------------|--------------------------------|
| <b>Identification code</b>        | <b>2b</b>                                   |                                |
| Empirical formula                 | C50 H60 N10 O10                             |                                |
| Formula weight                    | 961.08                                      |                                |
| Temperature                       | 153(2) K                                    |                                |
| Wavelength                        | 1.54178 Å                                   |                                |
| Crystal system                    | Monoclinic                                  |                                |
| Space group                       | P2(1)/n                                     |                                |
| Unit cell dimensions              | a = 23.3719(6) Å                            | $\alpha = 90^\circ$ .          |
|                                   | b = 10.7207(3) Å                            | $\beta = 114.4100(10)^\circ$ . |
|                                   | c = 26.6334(7) Å                            | $\gamma = 90 (3)^\circ$ .      |
| Volume                            | 6076.8(3) Å <sup>3</sup>                    |                                |
| Z                                 | 4                                           |                                |
| Density (calculated)              | 1.050 Mg/m <sup>3</sup>                     |                                |
| Absorption coefficient            | 0.612 mm <sup>-1</sup>                      |                                |
| F(000)                            | 2040                                        |                                |
| Crystal size                      | 0.20 x 0.10 x 0.08 mm <sup>3</sup>          |                                |
| Theta range for data collection   | 2.12 to 63.67°.                             |                                |
| Index ranges                      | -26<=h<=27, -12<=k<=12, -30<=l<=28          |                                |
| Reflections collected             | 37443                                       |                                |
| Independent reflections           | 9823 [R(int) = 0.0676]                      |                                |
| Completeness to theta = 27.48°    | 98.2 %                                      |                                |
| Absorption correction             | Semi-empirical from equivalents             |                                |
| Max. and min. transmission        | 0.9526 and 0.8873                           |                                |
| Refinement method                 | Full-matrix least-squares on F <sup>2</sup> |                                |
| Data / restraints / parameters    | 9823 / 265 / 581                            |                                |
| Goodness-of-fit on F <sup>2</sup> | 1.087                                       |                                |
| Final R indices [I>2sigma(I)]     | R1 = 0.1641, wR2 = 0.3507                   |                                |
| R indices (all data)              | R1 = 0.1793, wR2 = 0.3594                   |                                |
| Largest diff. peak and hole       | 1.459 and -1.137 e.Å <sup>-3</sup>          |                                |

|                                   |                                                               |                 |
|-----------------------------------|---------------------------------------------------------------|-----------------|
| <b>Identification code</b>        | <b>5b</b>                                                     |                 |
| Empirical formula                 | C <sub>34</sub> H <sub>46</sub> N <sub>6</sub> O <sub>9</sub> |                 |
| Formula weight                    | 682.77                                                        |                 |
| Temperature                       | 123(2) K                                                      |                 |
| Wavelength                        | 0.71073 Å                                                     |                 |
| Crystal system                    | Triclinic                                                     |                 |
| Space group                       | P-1                                                           |                 |
| Unit cell dimensions              | a = 12.1129(9) Å                                              | α = 69.583(2)°. |
|                                   | b = 12.7793(10) Å                                             | β = 68.112(2)°. |
|                                   | c = 13.0678(10) Å                                             | γ = 75.921(2)°. |
| Volume                            | 1744.1(2) Å <sup>3</sup>                                      |                 |
| Z                                 | 2                                                             |                 |
| Density (calculated)              | 1.300 Mg/m <sup>3</sup>                                       |                 |
| Absorption coefficient            | 0.095 mm <sup>-1</sup>                                        |                 |
| F(000)                            | 728                                                           |                 |
| Crystal size                      | 0.10 x 0.08 x 0.04 mm <sup>3</sup>                            |                 |
| Theta range for data collection   | 1.71 to 26.37 °.                                              |                 |
| Index ranges                      | -15 ≤ h ≤ 15, -15 ≤ k ≤ 15, -16 ≤ l ≤ 16                      |                 |
| Reflections collected             | 53798                                                         |                 |
| Independent reflections           | 7139 [R(int) = 0.0794]                                        |                 |
| Completeness to theta = 27.48°    | 100.0 %                                                       |                 |
| Absorption correction             | Semi-empirical from equivalents                               |                 |
| Max. and min. transmission        | 0.9962 and 0.9905                                             |                 |
| Refinement method                 | Full-matrix least-squares on F <sup>2</sup>                   |                 |
| Data / restraints / parameters    | 7139 / 130 / 538                                              |                 |
| Goodness-of-fit on F <sup>2</sup> | 1.016                                                         |                 |
| Final R indices [I > 2σ(I)]       | R1 = 0.0642, wR2 = 0.1561                                     |                 |
| R indices (all data)              | R1 = 0.1344, wR2 = 0.1967                                     |                 |
| Largest diff. peak and hole       | 0.255 and -0.222 e.Å <sup>-3</sup>                            |                 |

|                                   |                                             |                               |
|-----------------------------------|---------------------------------------------|-------------------------------|
| <b>Identification code</b>        | <b>5c</b>                                   |                               |
| Empirical formula                 | C42 H30 F3 N7 O8                            |                               |
| Formula weight                    | 817.73                                      |                               |
| Temperature                       | 100(2) K                                    |                               |
| Wavelength                        | 0.71073 Å                                   |                               |
| Crystal system                    | Triclinic                                   |                               |
| Space group                       | P-1                                         |                               |
| Unit cell dimensions              | a = 12.6347(15) Å                           | $\alpha = 94.470(3)^\circ$ .  |
|                                   | b = 12.8579(16) Å                           | $\beta = 117.546(2)^\circ$ .  |
|                                   | c = 13.3997(17) Å                           | $\gamma = 101.859(3)^\circ$ . |
| Volume                            | 1851.0(4) Å <sup>3</sup>                    |                               |
| Z                                 | 2                                           |                               |
| Density (calculated)              | 1.467 Mg/m <sup>3</sup>                     |                               |
| Absorption coefficient            | 0.114 mm <sup>-1</sup>                      |                               |
| F(000)                            | 844                                         |                               |
| Crystal size                      | 0.40 x 0.24 x 0.20 mm <sup>3</sup>          |                               |
| Theta range for data collection   | 1.84 to 27.48°.                             |                               |
| Index ranges                      | -16 ≤ h ≤ 16, -16 ≤ k ≤ 16, -17 ≤ l ≤ 17    |                               |
| Reflections collected             | 24267                                       |                               |
| Independent reflections           | 8473 [R(int) = 0.0270]                      |                               |
| Completeness to theta = 27.48°    | 99.6 %                                      |                               |
| Absorption correction             | Semi-empirical from equivalents             |                               |
| Max. and min. transmission        | 0.9776 and 0.9559                           |                               |
| Refinement method                 | Full-matrix least-squares on F <sup>2</sup> |                               |
| Data / restraints / parameters    | 8473 / 0 / 562                              |                               |
| Goodness-of-fit on F <sup>2</sup> | 1.051                                       |                               |
| Final R indices [I > 2σ(I)]       | R1 = 0.0411, wR2 = 0.1078                   |                               |
| R indices (all data)              | R1 = 0.0492, wR2 = 0.1129                   |                               |
| Largest diff. peak and hole       | 0.348 and -0.250 e.Å <sup>-3</sup>          |                               |

|                                   |                                             |                              |
|-----------------------------------|---------------------------------------------|------------------------------|
| <b>Identification code</b>        | <b>5d</b>                                   |                              |
| Empirical formula                 | C31 H24 F2 N4 O9                            |                              |
| Formula weight                    | 634.54                                      |                              |
| Temperature                       | 100(2) K                                    |                              |
| Wavelength                        | 0.71073 Å                                   |                              |
| Crystal system                    | Triclinic                                   |                              |
| Space group                       | P-1                                         |                              |
| Unit cell dimensions              | a = 7.6353(8) Å                             | $\alpha = 65.420(2)^\circ$ . |
|                                   | b = 13.1566(13) Å                           | $\beta = 79.934(2)^\circ$ .  |
|                                   | c = 15.6352(16) Å                           | $\gamma = 74.621(2)^\circ$ . |
| Volume                            | 1373.4(2) Å <sup>3</sup>                    |                              |
| Z                                 | 2                                           |                              |
| Density (calculated)              | 1.534 Mg/m <sup>3</sup>                     |                              |
| Absorption coefficient            | 0.123 mm <sup>-1</sup>                      |                              |
| F(000)                            | 656                                         |                              |
| Crystal size                      | 0.60 x 0.44 x 0.44 mm <sup>3</sup>          |                              |
| Theta range for data collection   | 1.74 to 27.50°.                             |                              |
| Index ranges                      | -9 ≤ h ≤ 9, -17 ≤ k ≤ 17, -20 ≤ l ≤ 20      |                              |
| Reflections collected             | 17991                                       |                              |
| Independent reflections           | 6288 [R(int) = 0.0317]                      |                              |
| Completeness to theta = 27.50°    | 99.8 %                                      |                              |
| Absorption correction             | Semi-empirical from equivalents             |                              |
| Max. and min. transmission        | 0.9478 and 0.9298                           |                              |
| Refinement method                 | Full-matrix least-squares on F <sup>2</sup> |                              |
| Data / restraints / parameters    | 6288 / 0 / 430                              |                              |
| Goodness-of-fit on F <sup>2</sup> | 1.031                                       |                              |
| Final R indices [I > 2σ(I)]       | R1 = 0.0432, wR2 = 0.1064                   |                              |
| R indices (all data)              | R1 = 0.0483, wR2 = 0.1099                   |                              |
| Largest diff. peak and hole       | 0.316 and -0.400 e.Å <sup>-3</sup>          |                              |

|                                   |                                                                  |                    |
|-----------------------------------|------------------------------------------------------------------|--------------------|
| <b>Identification code</b>        | <b>5e</b>                                                        |                    |
| Empirical formula                 | C <sub>52</sub> H <sub>42</sub> F N <sub>5</sub> O <sub>12</sub> |                    |
| Formula weight                    | 947.91                                                           |                    |
| Temperature                       | 100(2) K                                                         |                    |
| Wavelength                        | 0.71073 Å                                                        |                    |
| Crystal system                    | Monoclinic                                                       |                    |
| Space group                       | P2(1)/c                                                          |                    |
| Unit cell dimensions              | a = 14.2003(11) Å                                                | α = 90°.           |
|                                   | b = 19.8416(15) Å                                                | β = 111.9200(10)°. |
|                                   | c = 16.9153(13) Å                                                | γ = 90°.           |
| Volume                            | 4421.4(6) Å <sup>3</sup>                                         |                    |
| Z                                 | 4                                                                |                    |
| Density (calculated)              | 1.424 Mg/m <sup>3</sup>                                          |                    |
| Absorption coefficient            | 0.105 mm <sup>-1</sup>                                           |                    |
| F(000)                            | 1976                                                             |                    |
| Crystal size                      | 0.60 x 0.20 x 0.16 mm <sup>3</sup>                               |                    |
| Theta range for data collection   | 2.05 to 27.50°.                                                  |                    |
| Index ranges                      | -18 ≤ h ≤ 15, -25 ≤ k ≤ 25, -13 ≤ l ≤ 21                         |                    |
| Reflections collected             | 31302                                                            |                    |
| Independent reflections           | 10157 [R(int) = 0.0352]                                          |                    |
| Completeness to theta = 27.50°    | 99.9 %                                                           |                    |
| Absorption correction             | Semi-empirical from equivalents                                  |                    |
| Max. and min. transmission        | 0.9834 and 0.9395                                                |                    |
| Refinement method                 | Full-matrix least-squares on F <sup>2</sup>                      |                    |
| Data / restraints / parameters    | 10157 / 4 / 646                                                  |                    |
| Goodness-of-fit on F <sup>2</sup> | 1.052                                                            |                    |
| Final R indices [I > 2σ(I)]       | R1 = 0.0482, wR2 = 0.1078                                        |                    |
| R indices (all data)              | R1 = 0.0586, wR2 = 0.1132                                        |                    |
| Largest diff. peak and hole       | 0.331 and -0.301 e.Å <sup>-3</sup>                               |                    |



|                                   |                                             |                 |
|-----------------------------------|---------------------------------------------|-----------------|
| <b>Identification code</b>        | <b>5f</b>                                   |                 |
| Empirical formula                 | C38 H35 N3 O7                               |                 |
| Formula weight                    | 645.69                                      |                 |
| Temperature                       | 100(2) K                                    |                 |
| Wavelength                        | 0.71073 Å                                   |                 |
| Crystal system                    | Monoclinic                                  |                 |
| Space group                       | P2(1)/c                                     |                 |
| Unit cell dimensions              | a = 8.8451(8) Å                             | α = 90°.        |
|                                   | b = 23.553(2) Å                             | β = 99.906(2)°. |
|                                   | c = 15.8186(13) Å                           | γ = 90°.        |
| Volume                            | 3246.4(5) Å <sup>3</sup>                    |                 |
| Z                                 | 4                                           |                 |
| Density (calculated)              | 1.321 Mg/m <sup>3</sup>                     |                 |
| Absorption coefficient            | 0.092 mm <sup>-1</sup>                      |                 |
| F(000)                            | 1360                                        |                 |
| Crystal size                      | 0.40 x 0.30 x 0.26 mm <sup>3</sup>          |                 |
| Theta range for data collection   | 1.57 to 27.50°.                             |                 |
| Index ranges                      | -11 ≤ h ≤ 11, -18 ≤ k ≤ 30, -19 ≤ l ≤ 20    |                 |
| Reflections collected             | 22969                                       |                 |
| Independent reflections           | 7453 [R(int) = 0.0392]                      |                 |
| Completeness to theta = 27.50°    | 99.9 %                                      |                 |
| Absorption correction             | Semi-empirical from equivalents             |                 |
| Max. and min. transmission        | 0.8621 and 0.6748                           |                 |
| Refinement method                 | Full-matrix least-squares on F <sup>2</sup> |                 |
| Data / restraints / parameters    | 7453 / 45 / 469                             |                 |
| Goodness-of-fit on F <sup>2</sup> | 1.105                                       |                 |
| Final R indices [I > 2σ(I)]       | R1 = 0.0803, wR2 = 0.1846                   |                 |
| R indices (all data)              | R1 = 0.1024, wR2 = 0.1977                   |                 |
| Largest diff. peak and hole       | 0.961 and -0.526 e.Å <sup>-3</sup>          |                 |

|                                   |                                             |                             |
|-----------------------------------|---------------------------------------------|-----------------------------|
| <b>Identification code</b>        | <b>6a</b>                                   |                             |
| Empirical formula                 | C57.50 H49 Cl2 N7 O10.50                    |                             |
| Formula weight                    | 1076.94                                     |                             |
| Temperature                       | 100(2) K                                    |                             |
| Wavelength                        | 0.71073 Å                                   |                             |
| Crystal system                    | Monoclinic                                  |                             |
| Space group                       | P2(1)/n                                     |                             |
| Unit cell dimensions              | a = 18.507(2) Å                             | $\alpha = 90^\circ$ .       |
|                                   | b = 11.2044(13) Å                           | $\beta = 93.092(3)^\circ$ . |
|                                   | c = 24.538(3) Å                             | $\gamma = 90^\circ$ .       |
| Volume                            | 5080.8(10) Å <sup>3</sup>                   |                             |
| Z                                 | 4                                           |                             |
| Density (calculated)              | 1.408 Mg/m <sup>3</sup>                     |                             |
| Absorption coefficient            | 0.199 mm <sup>-1</sup>                      |                             |
| F(000)                            | 2244                                        |                             |
| Crystal size                      | 0.48 x 0.24 x 0.06 mm <sup>3</sup>          |                             |
| Theta range for data collection   | 1.42 to 25.00°.                             |                             |
| Index ranges                      | -21 ≤ h ≤ 22, -13 ≤ k ≤ 13, -29 ≤ l ≤ 21    |                             |
| Reflections collected             | 28869                                       |                             |
| Independent reflections           | 8939 [R(int) = 0.0783]                      |                             |
| Completeness to theta = 25.00°    | 99.9 %                                      |                             |
| Absorption correction             | Semi-empirical from equivalents             |                             |
| Max. and min. transmission        | 0.7456 and 0.5630                           |                             |
| Refinement method                 | Full-matrix least-squares on F <sup>2</sup> |                             |
| Data / restraints / parameters    | 8939 / 188 / 731                            |                             |
| Goodness-of-fit on F <sup>2</sup> | 1.049                                       |                             |
| Final R indices [I > 2σ(I)]       | R1 = 0.0850, wR2 = 0.2099                   |                             |
| R indices (all data)              | R1 = 0.1360, wR2 = 0.2371                   |                             |
| Largest diff. peak and hole       | 1.004 and -0.680 e.Å <sup>-3</sup>          |                             |

|                                   |                                             |                       |
|-----------------------------------|---------------------------------------------|-----------------------|
| <b>Identification code</b>        | <b>6b</b>                                   |                       |
| Empirical formula                 | C44 H33 F2 N5 O8                            |                       |
| Formula weight                    | 797.75                                      |                       |
| Temperature                       | 100(2) K                                    |                       |
| Wavelength                        | 0.71073 Å                                   |                       |
| Crystal system                    | Orthorhombic                                |                       |
| Space group                       | Pbca                                        |                       |
| Unit cell dimensions              | a = 13.3567(11) Å                           | $\alpha = 90^\circ$ . |
|                                   | b = 22.8181(18) Å                           | $\beta = 90^\circ$ .  |
|                                   | c = 23.430(2) Å                             | $\gamma = 90^\circ$ . |
| Volume                            | 7140.7(10) Å <sup>3</sup>                   |                       |
| Z                                 | 8                                           |                       |
| Density (calculated)              | 1.484 Mg/m <sup>3</sup>                     |                       |
| Absorption coefficient            | 0.111 mm <sup>-1</sup>                      |                       |
| F(000)                            | 3312                                        |                       |
| Crystal size                      | 0.29 x 0.28 x 0.23 mm <sup>3</sup>          |                       |
| Theta range for data collection   | 1.99 to 25.00°.                             |                       |
| Index ranges                      | -15 ≤ h ≤ 13, -25 ≤ k ≤ 27, -24 ≤ l ≤ 27    |                       |
| Reflections collected             | 40113                                       |                       |
| Independent reflections           | 6272 [R(int) = 0.0822]                      |                       |
| Completeness to theta = 25.00°    | 100.0 %                                     |                       |
| Absorption correction             | Semi-empirical from equivalents             |                       |
| Max. and min. transmission        | 0.9750 and 0.9686                           |                       |
| Refinement method                 | Full-matrix least-squares on F <sup>2</sup> |                       |
| Data / restraints / parameters    | 6272 / 0 / 534                              |                       |
| Goodness-of-fit on F <sup>2</sup> | 1.037                                       |                       |
| Final R indices [I > 2σ(I)]       | R1 = 0.0983, wR2 = 0.2467                   |                       |
| R indices (all data)              | R1 = 0.1307, wR2 = 0.2689                   |                       |
| Largest diff. peak and hole       | 1.366 and -0.581 e.Å <sup>-3</sup>          |                       |

|                                   |                                             |                 |
|-----------------------------------|---------------------------------------------|-----------------|
| <b>Identification code</b>        | <b>14</b>                                   |                 |
| Empirical formula                 | C100 H82 Cl4 K N14 O20                      |                 |
| Formula weight                    | 1980.70                                     |                 |
| Temperature                       | 293(2) K                                    |                 |
| Wavelength                        | 0.71073 Å                                   |                 |
| Crystal system                    | Monoclinic                                  |                 |
| Space group                       | C2/c                                        |                 |
| Unit cell dimensions              | a = 18.6302(16) Å                           | α = 90°.        |
|                                   | b = 20.0894(19) Å                           | β = 98.302(2)°. |
|                                   | c = 23.762(2) Å                             | γ = 90°.        |
| Volume                            | 8800.3(14) Å <sup>3</sup>                   |                 |
| Z                                 | 4                                           |                 |
| Density (calculated)              | 1.495 Mg/m <sup>3</sup>                     |                 |
| Absorption coefficient            | 0.268 mm <sup>-1</sup>                      |                 |
| F(000)                            | 4108                                        |                 |
| Crystal size                      | 0.46 x 0.37 x 0.27 mm <sup>3</sup>          |                 |
| Theta range for data collection   | 1.81 to 25.00°.                             |                 |
| Index ranges                      | -14 ≤ h ≤ 22, -23 ≤ k ≤ 22, -28 ≤ l ≤ 28    |                 |
| Reflections collected             | 25457                                       |                 |
| Independent reflections           | 7741 [R(int) = 0.0475]                      |                 |
| Completeness to theta = 25.00°    | 99.9 %                                      |                 |
| Absorption correction             | Semi-empirical from equivalents             |                 |
| Max. and min. transmission        | 0.7457 and 0.6085                           |                 |
| Refinement method                 | Full-matrix least-squares on F <sup>2</sup> |                 |
| Data / restraints / parameters    | 7741 / 218 / 664                            |                 |
| Goodness-of-fit on F <sup>2</sup> | 1.956                                       |                 |
| Final R indices [I > 2σ(I)]       | R1 = 0.1587, wR2 = 0.4501                   |                 |
| R indices (all data)              | R1 = 0.1893, wR2 = 0.4789                   |                 |
| Largest diff. peak and hole       | 1.956 and -1.308 e.Å <sup>-3</sup>          |                 |

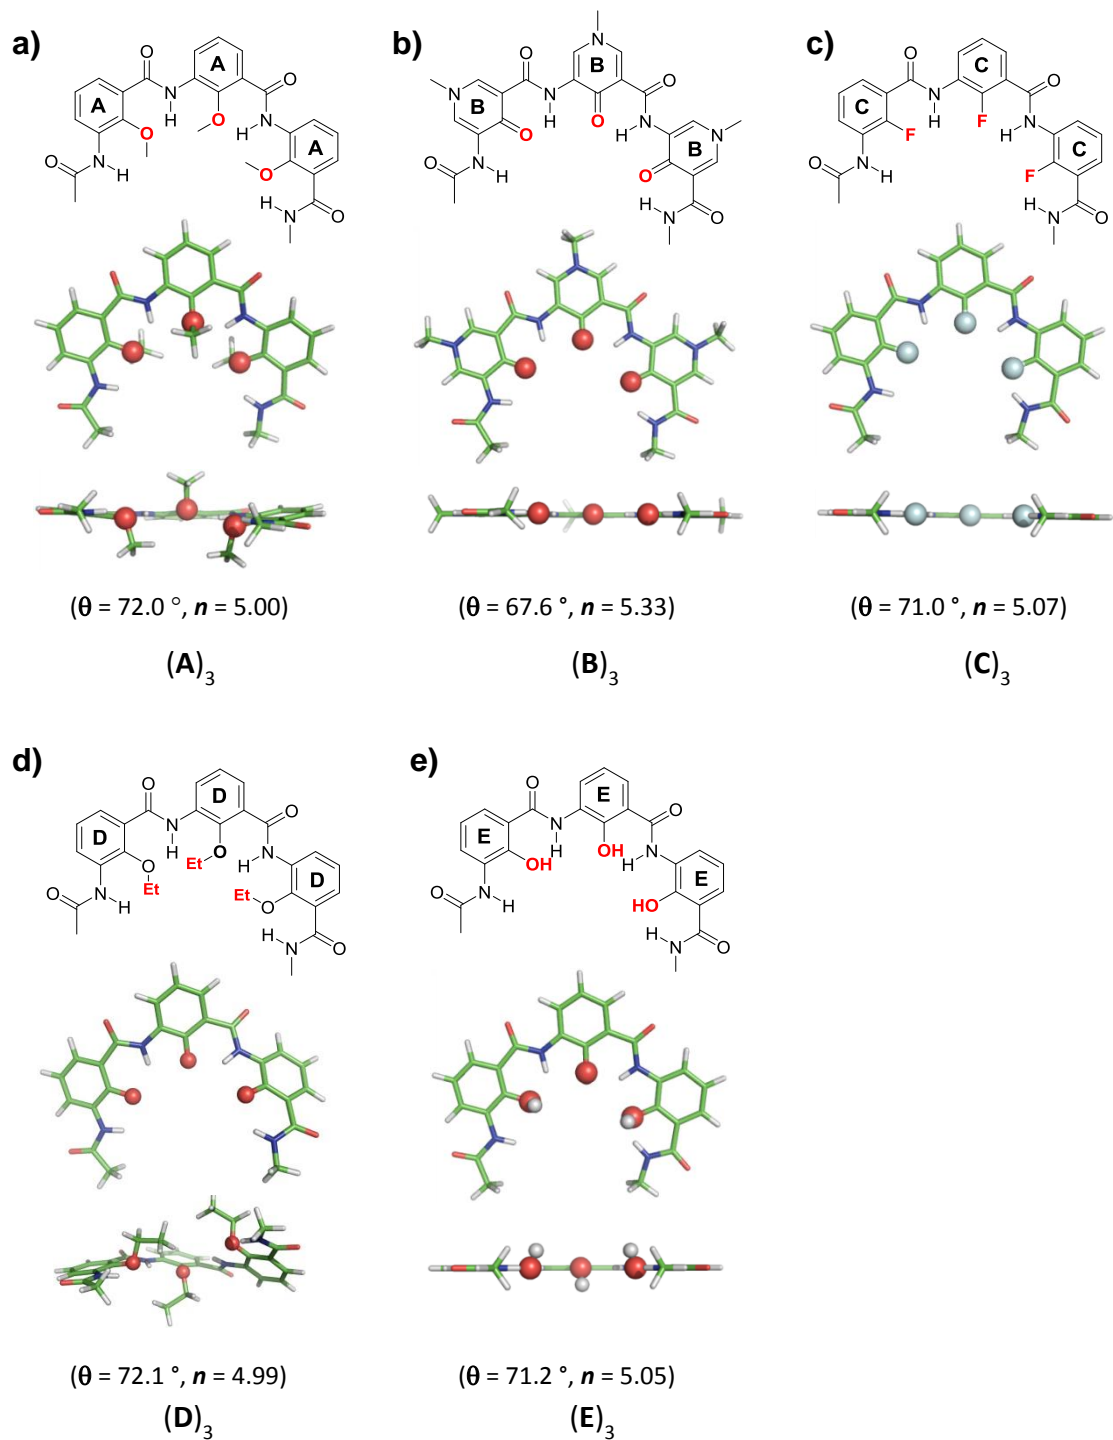

**Figure S1.** Computationally determined structures of trimers **(A)<sub>3</sub>**-**(E)<sub>3</sub>** and the corresponding  $\theta$  values and the number of residues ( $n$ ) required for A-E to form a regular pentagon.

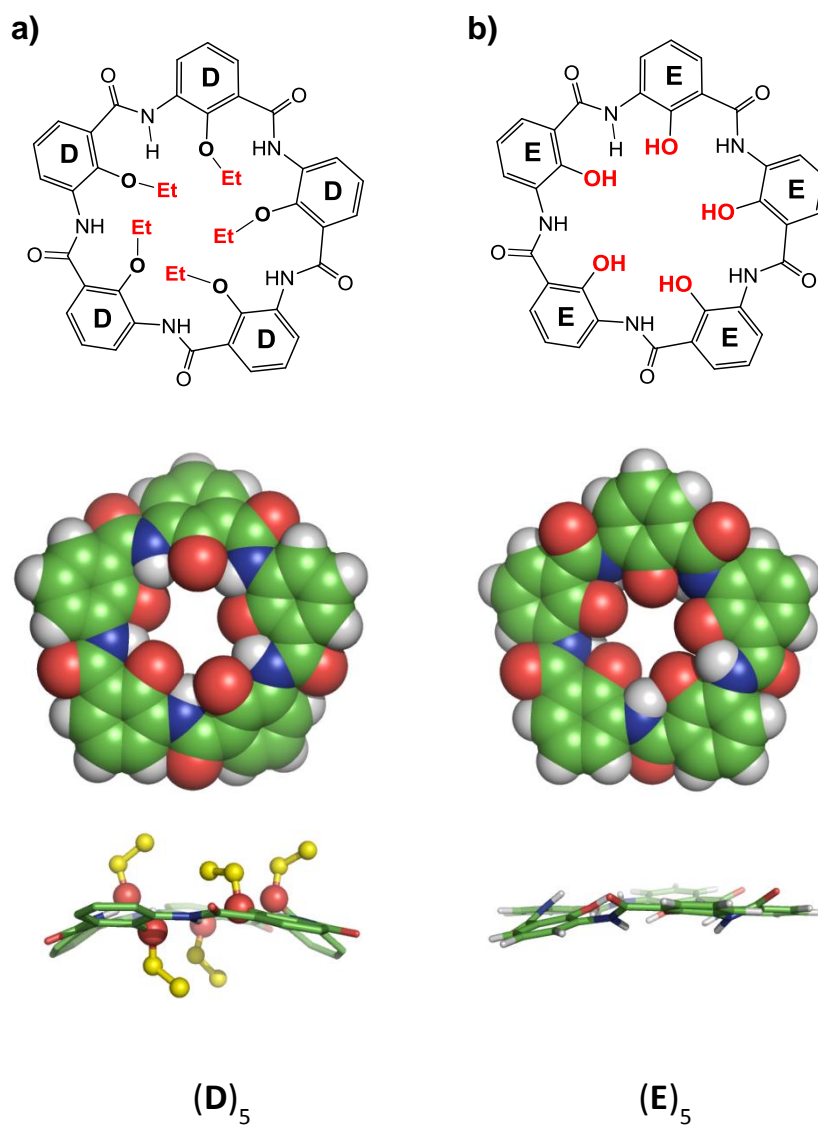

**Figure S2.** Computationally determined structures of circular pentamers (**D**)<sub>5</sub> and (**E**)<sub>5</sub>. While the larger ethyl groups in **D** significantly distorts the pentameric backbone of (**D**)<sub>5</sub>, a roughly planar backbone is still maintained in (**E**)<sub>5</sub>.

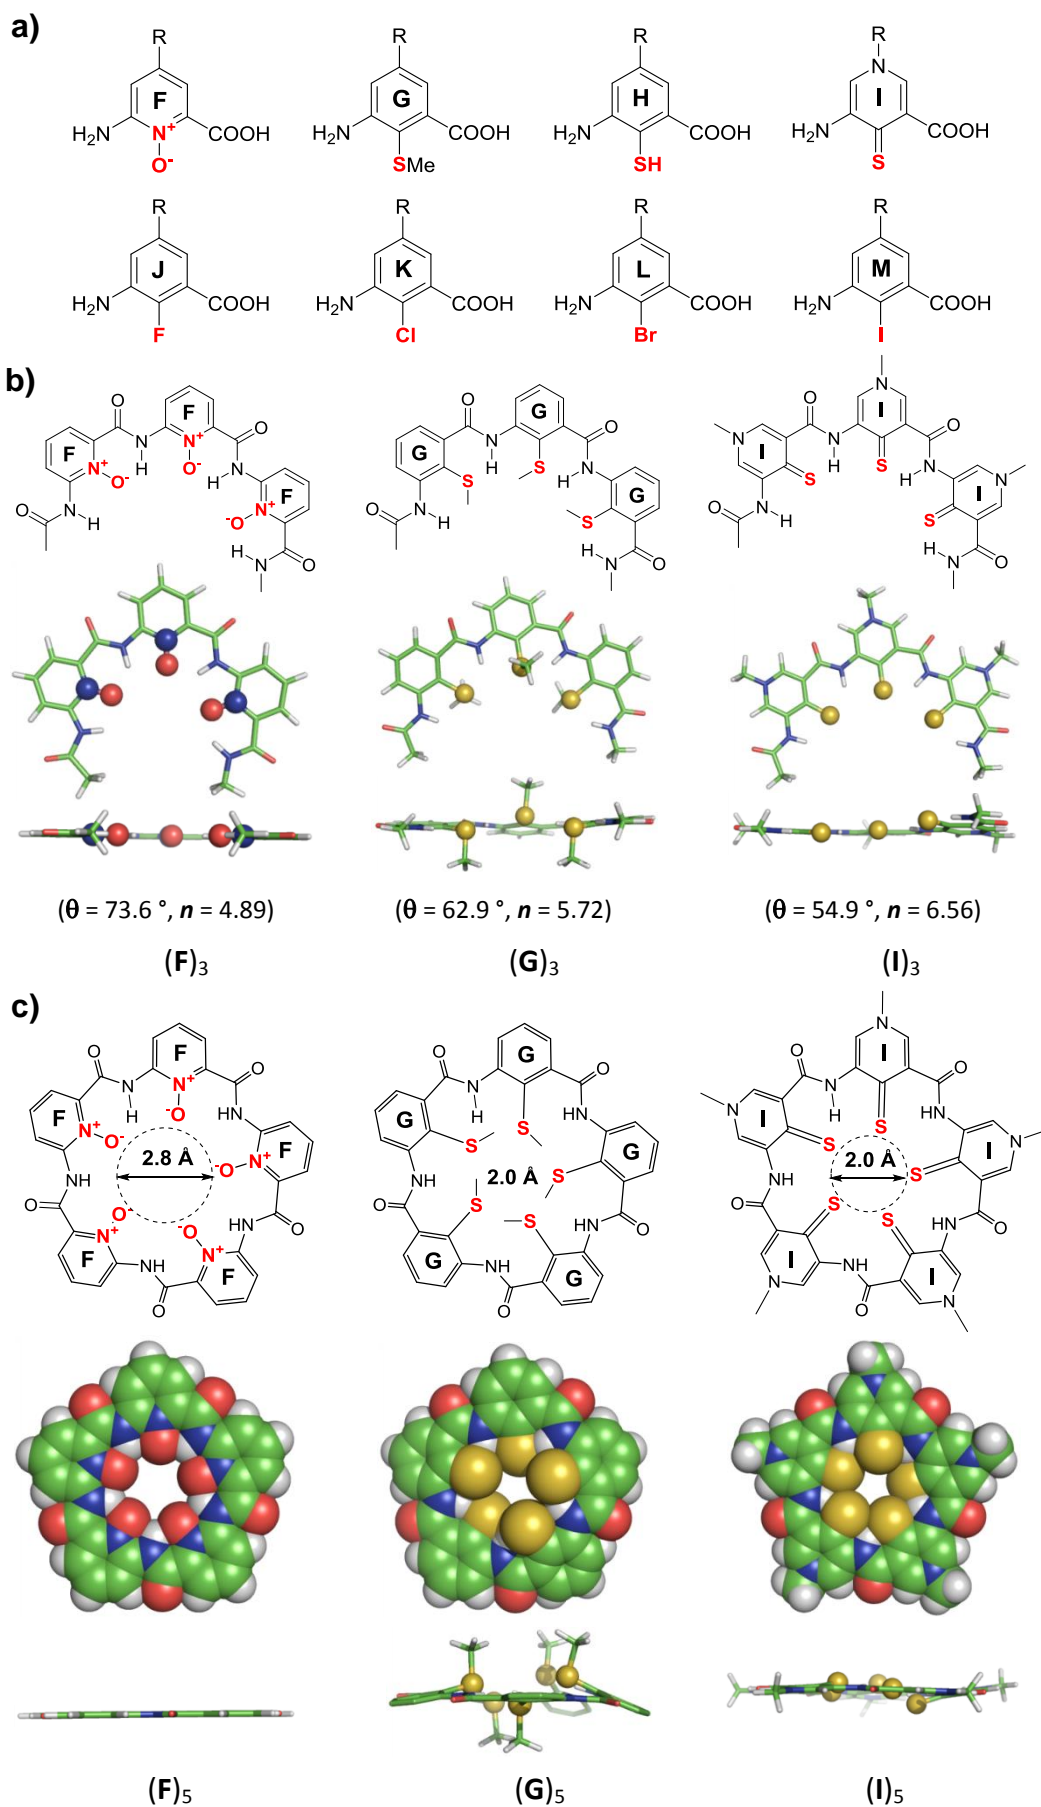

**Figure S3.** Possible functional groups for incorporation into the pentameric framework for augmenting ion-binding potential and selectivity.

a)

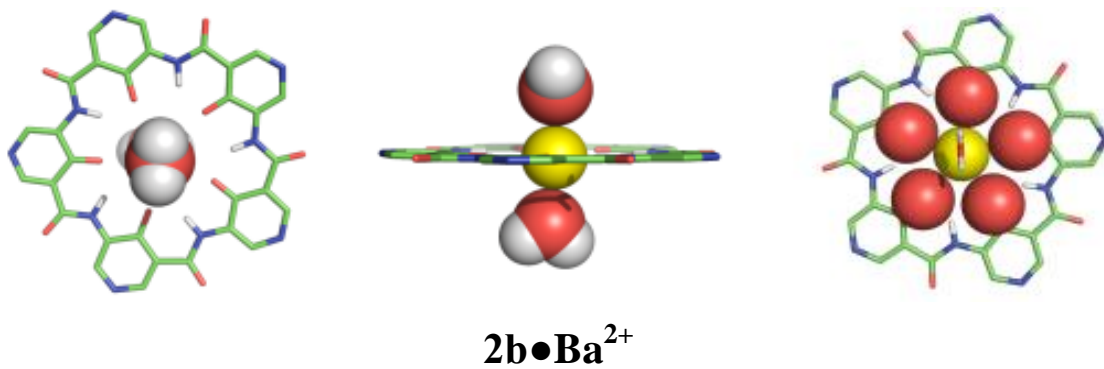

b)

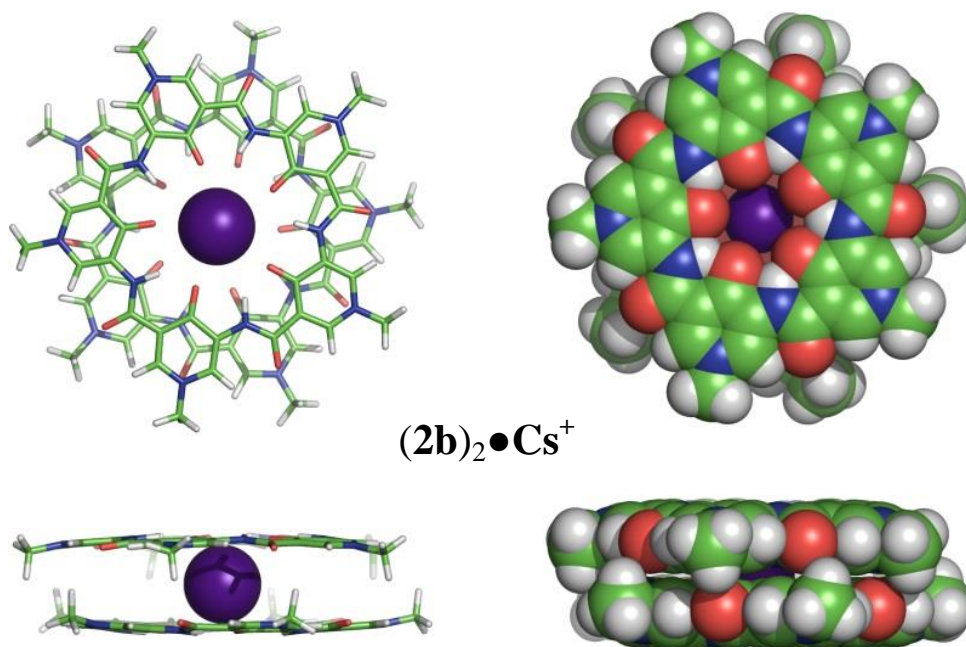

**Figure S4.** (a) Computationally determined structure of (a) the partially hydrated metal complex **2b•Ba<sup>2+</sup>** containing two water molecules and (b) sandwiched metal complex **(2b)<sub>2</sub>•Cs<sup>+</sup>**. From (b), an inter-planar distance of 3.8 Å between the two pentamers can be obtained.



**Table S1.** Extraction efficiencies (%) of 20 metal ions in their nitrate salts by macrocyclic hosts **2b** and **6-23** as determined by inductively coupled plasma mass spectrometry (ICP) with [total metal ions] = 0.60 mM and that of host variable from 0.30, 0.60 and 1.20 mM.<sup>a</sup>

|                        | <b>2b</b>  |            |            | <b>7</b>   |            |            | <b>8</b>   |            |            | <b>9</b>   |            |            | <b>10</b>  |            |            | <b>11</b>  |            |            | <b>12</b>  |            |            |
|------------------------|------------|------------|------------|------------|------------|------------|------------|------------|------------|------------|------------|------------|------------|------------|------------|------------|------------|------------|------------|------------|------------|
|                        | 0.30<br>mM | 0.60<br>mM | 1.20<br>mM |
| <b>Na<sup>+</sup></b>  | 42         | 78         | 95         | 32         | 66         | 92         | 27         | 66         | 94         | 24         | 47         | 91         | 26         | 53         | 86         | 31         | 67         | 93         | 17         | 41         | 87         |
| <b>K<sup>+</sup></b>   | 57         | 92         | 98         | 45         | 79         | 94         | 34         | 71         | 95         | 27         | 57         | 95         | 41         | 80         | 92         | 46         | 82         | 94         | 39         | 77         | 95         |
| <b>Rb<sup>+</sup></b>  | 69         | >99        | >99        | 70         | 98         | >99        | 67         | >99        | >99        | 65         | 98         | >99        |            |            |            |            |            |            |            |            |            |
| <b>Cs<sup>+</sup></b>  | 98         | >99        | >99        | 95         | >99        | >99        | 95         | >99        | >99        | 97         | >99        | >99        |            |            | 11         |            | 13         | 35         |            |            |            |
| <b>Ca<sup>2+</sup></b> | 14         | 43         | 90         | 16         | 36         | 72         | 12         | 33         | 67         | 10         | 18         | 32         | 13         | 38         | 79         | 17         | 33         | 72         | 24         | 43         | 90         |
| <b>Ag<sup>+</sup></b>  | 40         | 78         | >99        | 37         | 86         | >99        | 34         | 82         | >99        | 43         | 83         | >99        | 57         | 91         | 96         | 19         | 37         | 74         | 10         | 30         | 67         |
| <b>Tl<sup>+</sup></b>  | 85         | >99        | >99        | 83         | >99        | >99        | 72         | >99        | >99        | 35         | 65         | 93         |            |            |            |            |            | 7          |            |            |            |
| <b>Pb<sup>2+</sup></b> | 27         | 82         | >99        | 14         | 20         | 47         |            |            |            | 6          | 17         | 45         |            |            |            |            |            |            |            |            |            |
|                        |            |            |            |            |            |            |            |            |            |            |            |            |            |            |            |            |            |            |            |            |            |
|                        | <b>13</b>  |            |            | <b>14</b>  |            |            | <b>15</b>  |            |            | <b>16</b>  |            |            | <b>17</b>  |            |            | <b>18</b>  |            |            | <b>19</b>  |            |            |
|                        | 0.30<br>mM | 0.60<br>mM | 1.20<br>mM |
| <b>Na<sup>+</sup></b>  | 18         | 47         | 89         | 23         | 53         | 90         | 24         | 56         | 91         | 16         | 52         | 86         | 31         | 70         | 94         | 21         | 50         | 88         | 29         | 58         | 93         |
| <b>K<sup>+</sup></b>   | 20         | 59         | 93         | 32         | 77         | 97         | 28         | 67         | 95         | 40         | 80         | 95         | 38         | 74         | 96         | 23         | 61         | 94         | 30         | 64         | 95         |
| <b>Rb<sup>+</sup></b>  |            |            |            |            |            |            |            |            |            |            |            |            |            |            |            |            |            |            |            |            |            |
| <b>Cs<sup>+</sup></b>  |            |            |            |            |            |            |            |            |            |            |            |            |            |            |            |            |            |            |            |            |            |
| <b>Ca<sup>2+</sup></b> |            | 19         | 30         | 13         | 23         | 56         | 24         | 41         | 87         | 23         | 44         | 89         | 20         | 47         | 82         | 7          | 15         | 27         | 15         | 25         | 42         |
| <b>Ag<sup>+</sup></b>  | 15         | 27         | 70         | 13         | 37         | 75         | 77         | 98         | >99        | 47         | 93         | >99        | 95         | 98         | >99        | 15         | 35         | 81         | 18         | 37         | 87         |
| <b>Tl<sup>+</sup></b>  |            |            |            |            |            |            |            |            |            |            |            |            |            |            |            |            |            |            |            |            |            |
| <b>Pb<sup>2+</sup></b> |            |            |            |            |            |            |            |            |            |            |            |            |            |            |            | 14         | 25         | 33         |            |            |            |
|                        |            |            |            |            |            |            |            |            |            |            |            |            |            |            |            |            |            |            |            |            |            |
|                        | <b>20</b>  |            |            | <b>6a</b>  |            |            | <b>6b</b>  |            |            | <b>21</b>  |            |            | <b>22</b>  |            |            | <b>23</b>  |            |            |            |            |            |
|                        | 0.30<br>mM | 0.60<br>mM | 1.20<br>mM |            |            |            |
| <b>Na<sup>+</sup></b>  | 16         | 51         | 85         |            | 6          | 16         | 15         | 49         | 78         | 87         | 95         | 97         |            |            | 10         | 73         | 93         | 94         |            |            |            |
| <b>K<sup>+</sup></b>   | 22         | 56         | 93         | 6          | 42         | 70         | 24         | 63         | 94         | 92         | 95         | 98         |            |            | 9          | 78         | 94         | 97         |            |            |            |
| <b>Rb<sup>+</sup></b>  |            |            |            |            |            |            |            |            |            |            |            |            |            |            |            |            |            |            |            |            |            |
| <b>Cs<sup>+</sup></b>  |            |            |            |            |            |            |            |            |            |            |            |            | 11         | 21         |            |            |            |            |            |            |            |
| <b>Ca<sup>2+</sup></b> | 8          | 21         | 33         | 7          | 39         | 69         | 23         | 52         | 85         | 66         | 91         | 94         |            |            | 9          | 38         | 67         | 91         |            |            |            |
| <b>Ag<sup>+</sup></b>  | 41         | 85         | 95         |            |            | 7          |            |            | 15         |            | 8          | 15         |            |            |            |            | 7          | 20         |            |            |            |
| <b>Tl<sup>+</sup></b>  |            |            |            |            |            |            |            |            |            |            |            |            |            |            |            |            |            | 7          |            |            |            |
| <b>Pb<sup>2+</sup></b> | 9          |            |            |            |            |            |            |            |            |            | 19         |            |            |            | 6          |            |            | 8          |            |            |            |
|                        |            |            |            |            |            |            |            |            |            |            |            |            |            |            |            |            |            |            |            |            |            |

<sup>a</sup> The concentration of each metal ion is set at 0.03 mM with a total concentration for 20 metal ions being 0.60 mM in H<sub>2</sub>O containing 1% HNO<sub>3</sub>, and that of the organic macrocyclic hosts ranges from 0.30 mM to 0.6 mM and to 1.20 mM in CHCl<sub>3</sub>. Extractions were carried out in a biphasic system using equal volumes of H<sub>2</sub>O containing metal ions and CHCl<sub>3</sub> containing organic host at 25 °C. All the reported data are averaged values over six runs with relative errors within 3%, and only extraction efficiencies of ≥ 6% are listed. Except for additional extractions of Ba<sup>2+</sup> and Cu<sup>2+</sup> by **2b** and Mg<sup>2+</sup> by **23** (please see Table S2), extractions of other metal ions including Li<sup>+</sup>, Mg<sup>2+</sup>, Ba<sup>2+</sup>, Al<sup>3+</sup>, Cr<sup>3+</sup>, Mn<sup>2+</sup>, Fe<sup>3+</sup>, Co<sup>2+</sup>, Ni<sup>2+</sup>, Cu<sup>2+</sup>, Zn<sup>2+</sup> and Cd<sup>2+</sup> by the macrocyclic hosts remain experimentally undetectable. The most extractable Ions and those ions whose extractability lies within 80% of the most extractable ions are highlighted in gray to illustrate the ion-binding selectivity by the varying hosts. The numbers highlighted in yellow were used to calculate the ion-binding selectivity by **10-16**, **18-20** and **22** as presented in Figure 6b-c, and for similar calculations for **2b**, **2-9**, **21** and **23**, see Table S2. <sup>b</sup> Total extraction is the sum of all the measurable extraction efficiencies for the ions, and extraction values for Ba<sup>2+</sup> and Cu<sup>2+</sup> by **2b** and Mg<sup>2+</sup> by **23** as shown in Table S2 were also included in the calculation.

**Table S2.** Extraction efficiencies (%) of 20 metal ions in their nitrate salts by macrocyclic hosts **2b** and **7-9** as determined by inductively coupled plasma mass spectrometry (ICP) with [total metal ions] = 0.60 mM and that of host variable from 0.10, 0.15, 0.30, 0.60 and 1.20 mM.<sup>a</sup>

|                        | <b>2b</b>  |            |            |            |            | <b>7</b>   |            |            |            |            | <b>8</b>   |            |            |            |            | <b>9</b>   |            |            |            |            |
|------------------------|------------|------------|------------|------------|------------|------------|------------|------------|------------|------------|------------|------------|------------|------------|------------|------------|------------|------------|------------|------------|
|                        | 0.10<br>mM | 0.15<br>mM | 0.30<br>mM | 0.60<br>mM | 1.20<br>mM | 0.10<br>mM | 0.15<br>mM | 0.30<br>mM | 0.60<br>mM | 1.20<br>mM | 0.10<br>mM | 0.15<br>mM | 0.30<br>mM | 0.60<br>mM | 1.20<br>mM | 0.10<br>mM | 0.15<br>mM | 0.30<br>mM | 0.60<br>mM | 1.20<br>mM |
| <b>Na<sup>+</sup></b>  |            | 13         | 42         | 78         | 93         | 9          | 15         | 32         | 66         | 92         |            | 9          | 27         | 66         | 94         |            | 9          | 24         | 47         | 91         |
| <b>K<sup>+</sup></b>   | 13         | 25         | 57         | 92         | 94         | 13         | 21         | 45         | 79         | 94         | 10         | 15         | 34         | 71         | 95         |            | 11         | 27         | 57         | 95         |
| <b>Rb<sup>+</sup></b>  | 17         | 28         | 69         | >99        | >99        | 20         | 37         | 70         | 98         | >99        | 18         | 30         | 67         | >99        | >99        | 18         | 31         | 65         | 98         | >99        |
| <b>Cs<sup>+</sup></b>  | 62         | 89         | 98         | >99        | >99        | 65         | 87         | 95         | >99        | >99        | 63         | 85         | 95         | >99        | >99        | 63         | 90         | 97         | >99        | >99        |
| <b>Ca<sup>2+</sup></b> |            | 7          | 14         | 41         | 88         |            |            | 16         | 36         | 72         |            |            | 12         | 33         | 67         |            |            | 10         | 18         | 32         |
| <b>Ag<sup>+</sup></b>  |            | 15         | 43         | 78         | >99        | 9          | 21         | 37         | 86         | >99        | 5          | 15         | 34         | 82         | >99        | 15         | 25         | 43         | 83         | >99        |
| <b>Tl<sup>+</sup></b>  | 21         | 39         | 85         | >99        | >99        | 23         | 45         | 83         | >99        | >99        | 18         | 31         | 72         | >99        | >99        | 9          | 16         | 35         | 65         | 93         |
| <b>Pb<sup>2+</sup></b> |            | 8          | 27         | 82         | >99        |            |            | 14         | 20         | 47         |            |            |            |            |            |            |            | 6          | 17         | 45         |
| <b>Ba<sup>2+</sup></b> | 26         | 64         | 99         | >99        | >99        |            |            | 10         | 31         |            |            |            |            |            |            |            |            |            | 8          | 26         |
| <b>Cu<sup>2+</sup></b> |            |            | 12         | 43         | 95         |            |            |            | 10         |            |            |            |            | 19         |            |            |            | 7          |            | 21         |
|                        | <b>17</b>  |            |            |            |            | <b>21</b>  |            |            |            |            | <b>23</b>  |            |            |            |            |            |            |            |            |            |
|                        | 0.10<br>mM | 0.15<br>mM | 0.30<br>mM | 0.60<br>mM | 1.20<br>mM | 0.10<br>mM | 0.15<br>mM | 0.30<br>mM | 0.60<br>mM | 1.20<br>mM | 0.10<br>mM | 0.15<br>mM | 0.30<br>mM | 0.60<br>mM | 1.20<br>mM |            |            |            |            |            |
| <b>Na<sup>+</sup></b>  |            | 9          | 31         | 70         | 94         | 23         | 39         | 87         | 95         | 97         | 19         | 30         | 73         | 93         | 94         |            |            |            |            |            |
| <b>K<sup>+</sup></b>   | 8          | 15         | 38         | 74         | 96         | 28         | 45         | 92         | 95         | 98         | 23         | 36         | 78         | 94         | 97         |            |            |            |            |            |
| <b>Rb<sup>+</sup></b>  |            |            |            |            |            |            |            |            |            |            |            |            |            |            |            |            |            |            |            |            |
| <b>Cs<sup>+</sup></b>  |            |            |            |            |            |            |            |            |            |            |            |            |            |            |            |            |            |            |            |            |
| <b>Ca<sup>2+</sup></b> |            | 7          | 20         | 47         | 82         | 12         | 26         | 66         | 91         | 94         | 10         | 13         | 38         | 67         | 91         |            |            |            |            |            |
| <b>Ag<sup>+</sup></b>  | 55         | 83         | 95         | 98         | >99        |            |            |            | 8          | 15         |            |            |            | 7          | 20         |            |            |            |            |            |
| <b>Tl<sup>+</sup></b>  |            |            |            |            |            |            |            |            |            |            |            |            |            |            | 7          |            |            |            |            |            |
| <b>Pb<sup>2+</sup></b> |            |            |            |            |            |            |            |            | 13         |            |            |            |            |            | 8          |            |            |            |            |            |
| <b>Ba<sup>2+</sup></b> |            |            |            |            |            |            |            |            |            |            |            |            |            |            |            |            |            |            |            |            |
| <b>Cu<sup>2+</sup></b> |            |            |            |            |            |            |            |            |            |            |            |            |            |            |            |            |            |            |            |            |
| <b>Mg<sup>2+</sup></b> |            |            |            |            |            |            |            |            |            |            | 7          | 23         | 33         | 71         |            |            |            |            |            |            |

<sup>a</sup> The concentration of each metal ion is set at 0.03 mM with a total concentration for 20 metal ions being 0.60 mM in H<sub>2</sub>O containing 1% HNO<sub>3</sub>, and that of the organic macrocyclic hosts ranges from 0.10 mM to 1.20 mM in CHCl<sub>3</sub>. Extractions were carried out in a biphasic system using equal volumes of H<sub>2</sub>O containing metal ions and CHCl<sub>3</sub> containing organic host at 25 °C. All the reported data are averaged values over six runs with relative errors within 3%, and only extraction efficiencies of ≥ 6% are listed. Except for additional extractions of Ba<sup>2+</sup> and Cu<sup>2+</sup> by **2b** and Mg<sup>2+</sup> by **23**, extractions of other metal ions including Li<sup>+</sup>, Mg<sup>2+</sup>, Ba<sup>2+</sup>, Al<sup>3+</sup>, Cr<sup>3+</sup>, Mn<sup>2+</sup>, Fe<sup>3+</sup>, Co<sup>2+</sup>, Ni<sup>2+</sup>, Cu<sup>2+</sup>, Zn<sup>2+</sup> and Cd<sup>2+</sup> by the macrocyclic hosts remain experimentally undetectable. The most extractable Ions and those ions whose extractability lies within 80% of the most extractable ions are highlighted in gray to illustrate the ion-binding selectivity by the varying hosts. The numbers highlighted in yellow were used to calculate the ion-binding selectivity for **2b**, **2-9**, **21** and **23** as presented in Figure 6b-c.

## Picrate Extraction Experiment for Determination of Binding Constants

**Preparation of Alkali metal Picrates:** The alkali metal picrates ( $\text{Li}^+$ ,  $\text{Na}^+$ ,  $\text{K}^+$ ,  $\text{Rb}^+$  and  $\text{Cs}^+$ ) were prepared by dissolving picric acid in a minimum amount of distilled boiling water to which a stoichiometric amount of the alkali metal hydroxide was slowly added. The alkali metal picrate solution was then cooled to room temperature and placed in an ice bath to facilitate crystallization. The precipitate was filtered and recrystallized from distilled water. After filtration and extensive air drying, the salt was carefully heated to dryness in a vacuum oven at  $75^\circ\text{C}$  for overnight and cooled to room temperature under  $\text{N}_2$  protection. The anhydrous metal picrates were stored in a desiccator.

**Procedure for Picrate Extraction Experiment:** Extractions of alkali metal picrates ( $\text{Li}^+$ ,  $\text{Na}^+$ ,  $\text{K}^+$ ,  $\text{Rb}^+$  and  $\text{Cs}^+$ ) with hosts were performed by placing 1.0 mL of a 10 mM solution of the metal picrate in deionized water and 1.0 mL of a 10 mM solution of the hosts in chloroform into a 4-mL sample vial and mixing the solutions on a vortex mixer for 60 seconds. The sample was then allowed to stand for overnight to ensure a complete separation of the layers and extraction of ions into chloroform layer. Aliquot was taken from the aqueous phase of the sample, and its concentration of metal picrate was determined by UV-Visible spectroscopy with a scanning from 250 nm to 500 nm to obtain the concentration of metal picrate ( $C$ ) in chloroform layer. The control extraction experiments using chloroform containing no ligands were carried out in the same way, and the concentration of metal picrate extracted into chloroform layer was deducted from concentration  $C$  to derive the actual concentration of metal picrate extracted into chloroform layer by ligands. The extraction constants ( $K_{ex}$ ) and association constants ( $K_a$ ) were calculated according to method previously described (Moore, S. S.; Tarnowski, T. L.; Newcomb, M.; Cram, D. J. *J. Am. Chem. Soc.* **1977**, 99, 6398-6405). Three samples were prepared for each picrate extraction experiment. Standard deviations from the analysis of the three samples were less than 10% in terms of both  $K_{ex}$  and  $K_a$  values.

$^1\text{H}$  and  $^{13}\text{C}$  NMR spectra of 1j

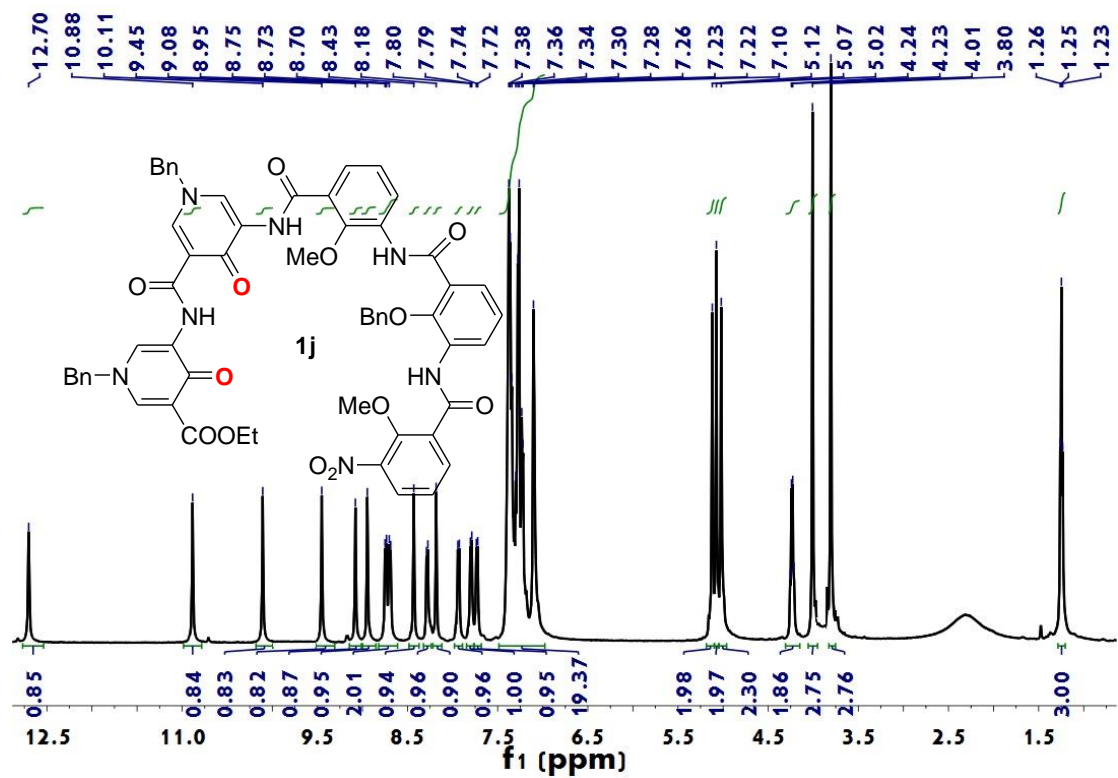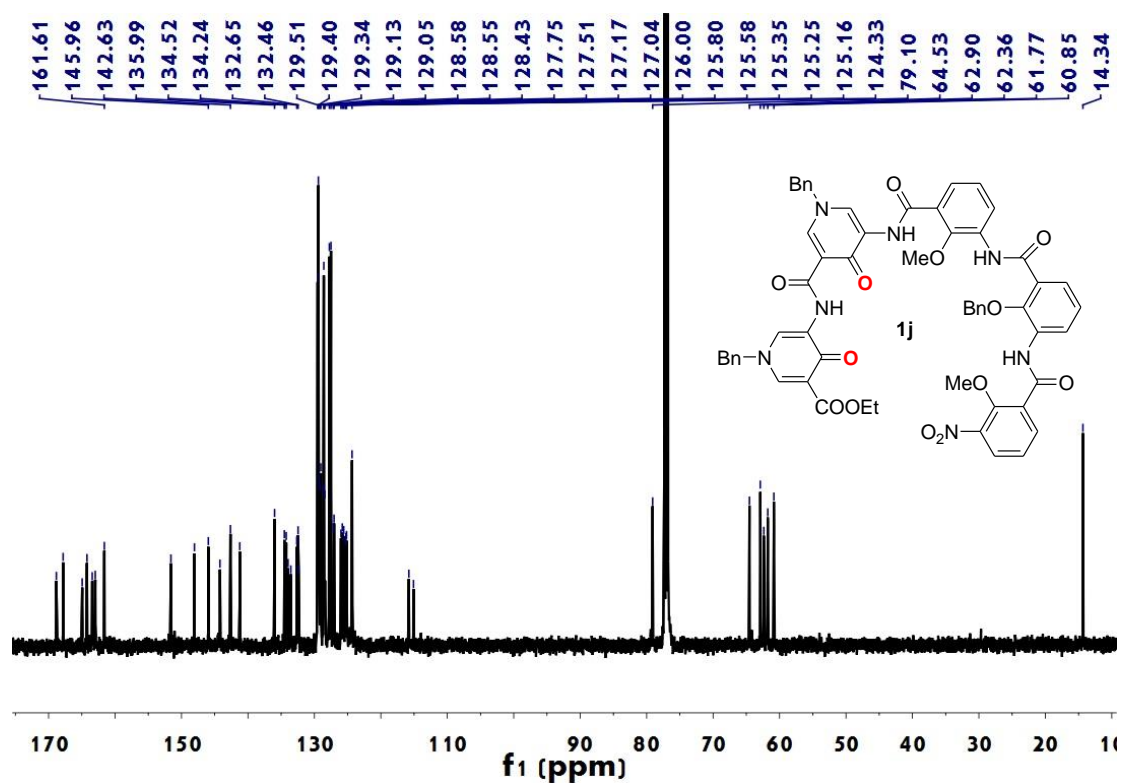

$^1\text{H}$  spectrum of 5g

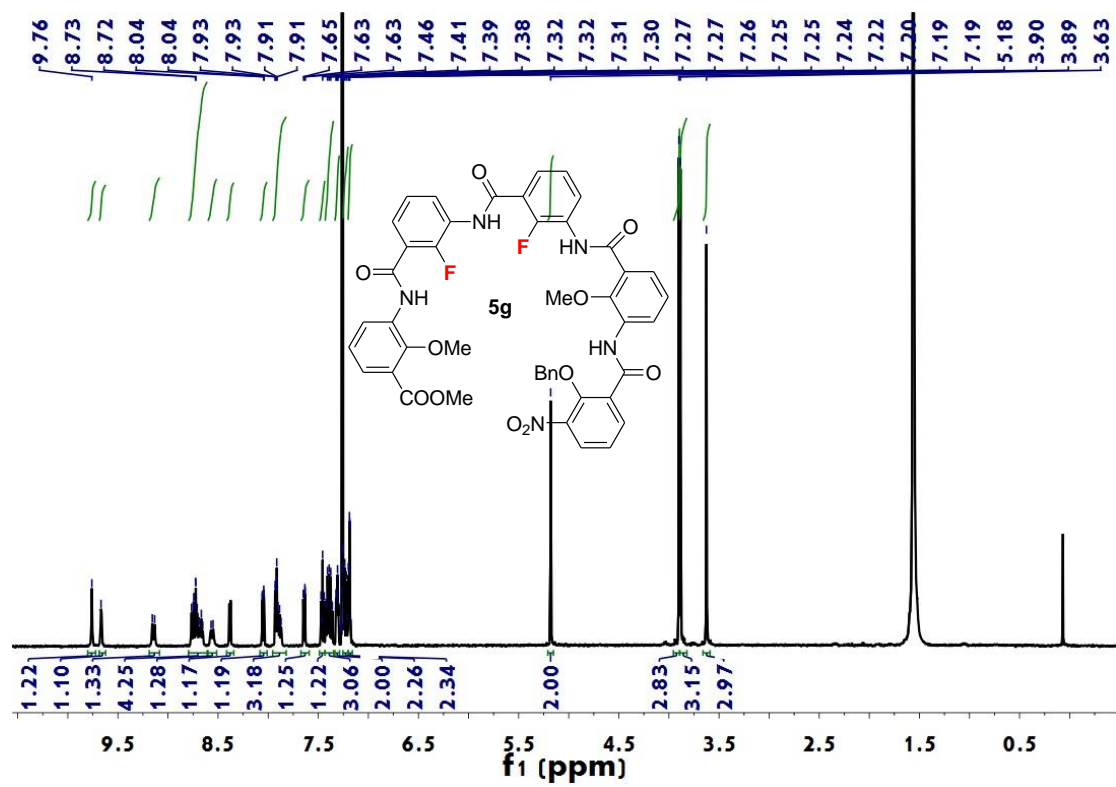

$^1\text{H}$  and  $^{13}\text{C}$  NMR spectra of **5e**

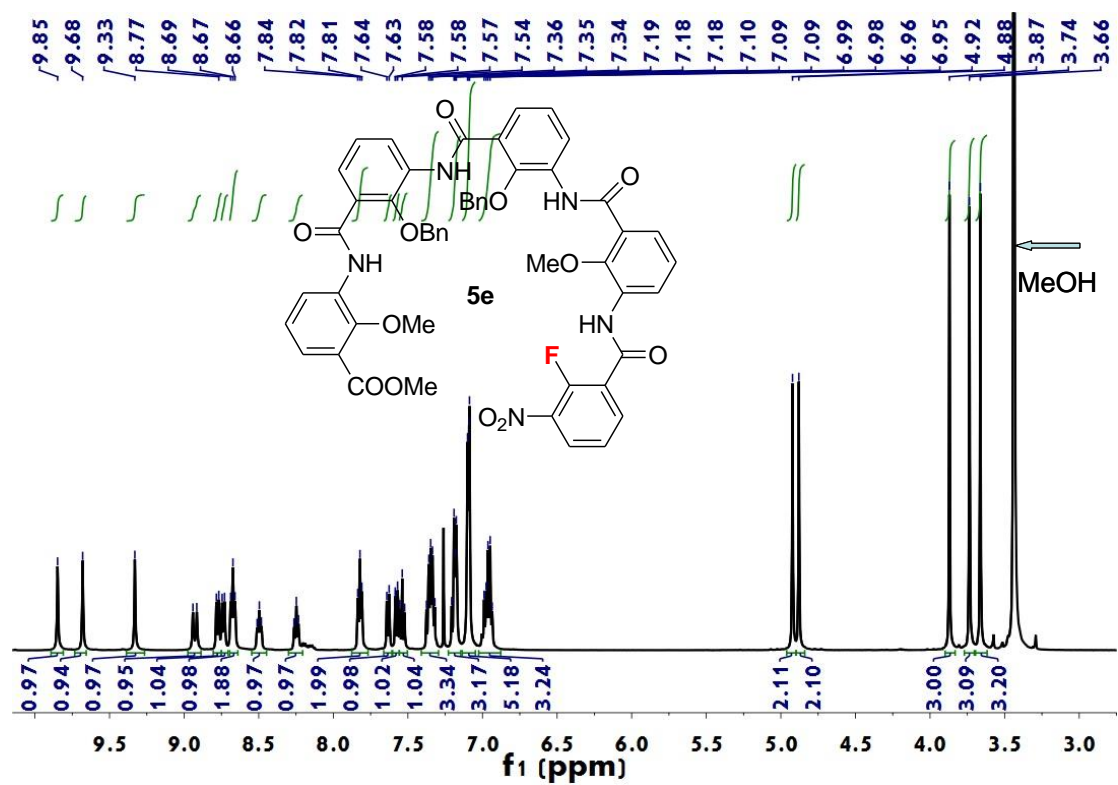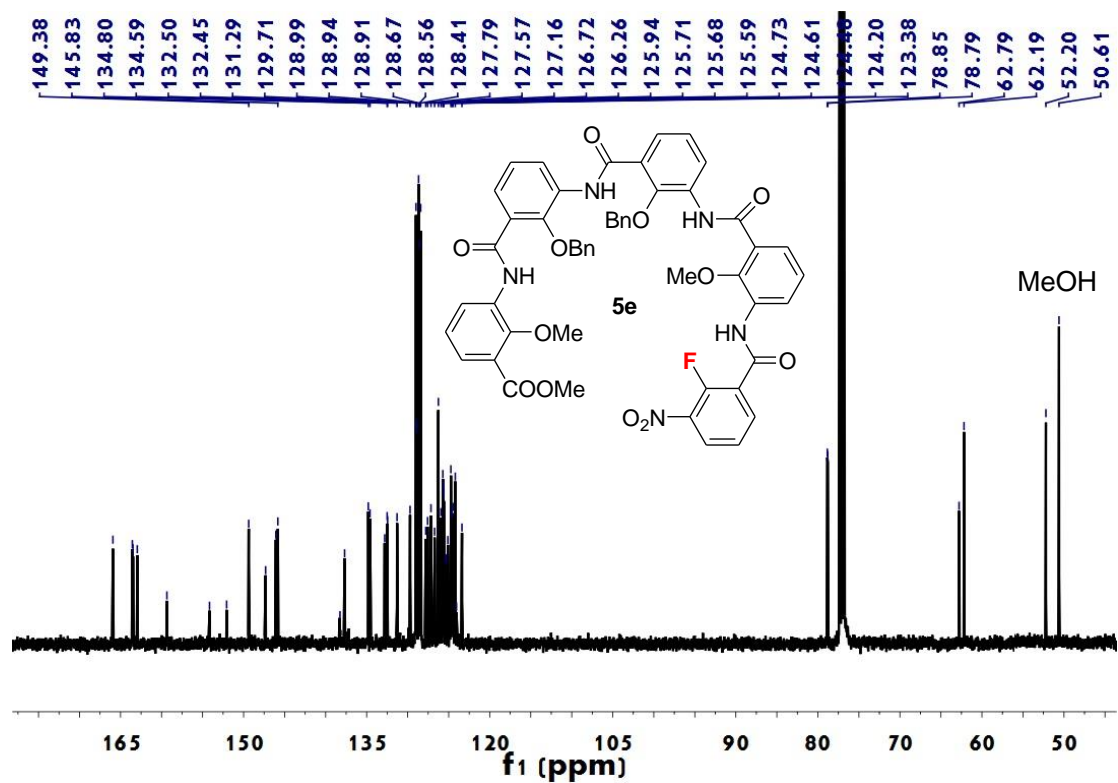

$^1\text{H}$  and  $^{13}\text{C}$  NMR spectra of 6a

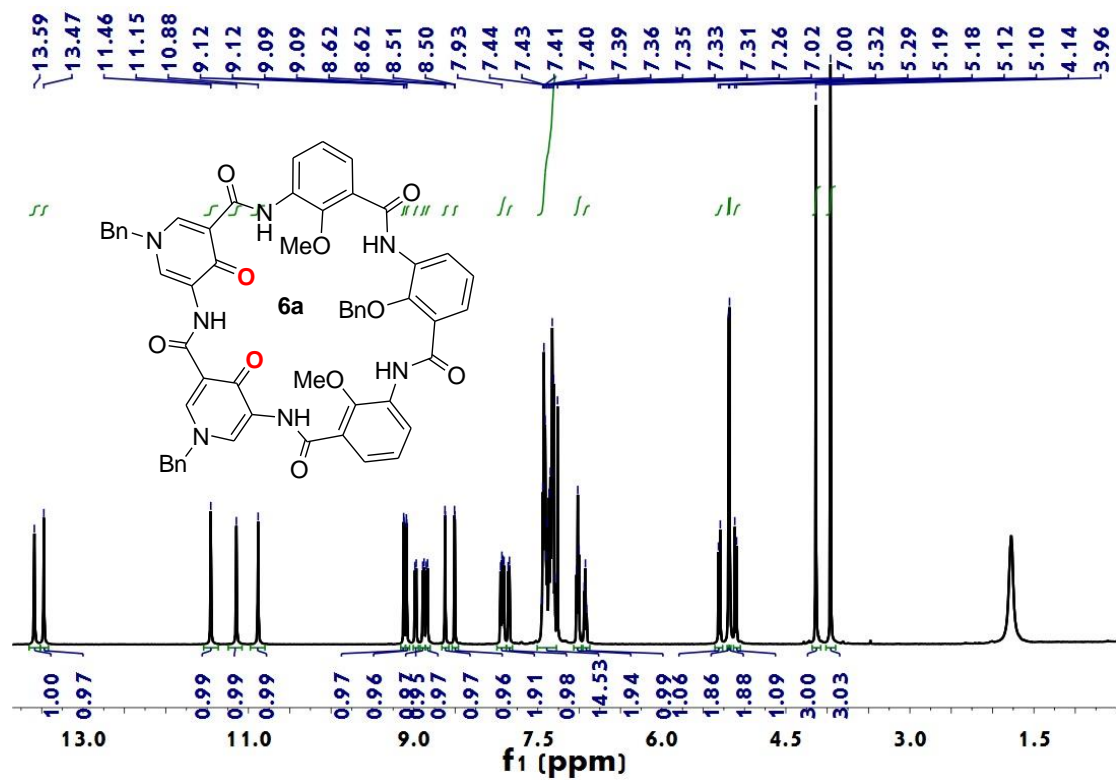

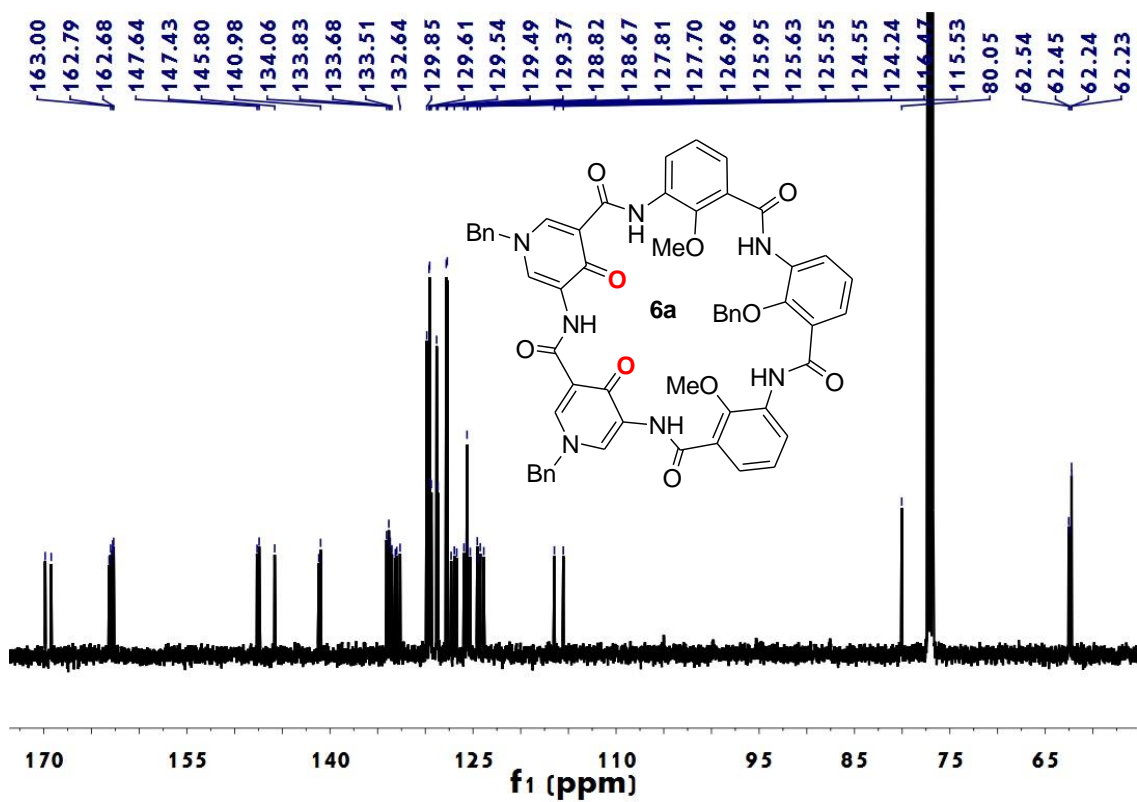

<sup>1</sup>H and <sup>13</sup>C NMR spectra of 6b

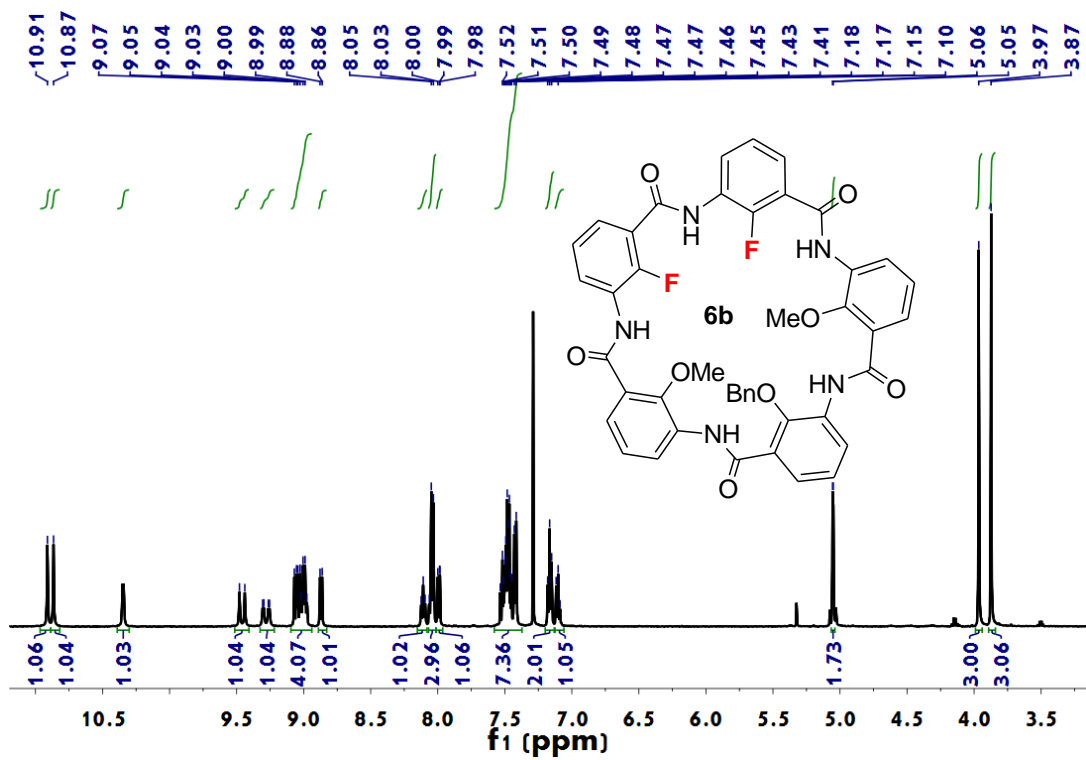



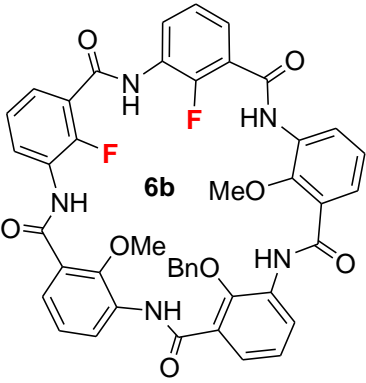

Chemical structure of compound **7c** is shown, featuring a central amide linkage connecting two pyridine rings. The structure includes various substituents: a long alkyl chain ( $C_8H_{17}$ ), a methoxy group ( $MeO$ ), a nitro group ( $O_2N$ ), and an ethyl ester group ( $COOEt$ ).

The  $^1H$  NMR spectrum (CDCl<sub>3</sub>) shows peaks corresponding to the structure. Integration values are provided for several peak regions:

- 0.86, 0.96, 0.98 (triplet,  $CH_3$  of  $COOEt$ )
- 0.75 (singlet,  $CH$  of  $COOEt$ )
- 1.18, 1.07, 1.00, 1.08, 1.22, 1.00 (multiplet,  $CH_2$  of  $COOEt$ )
- 0.93, 0.91 (multiplet,  $CH$  of  $COOEt$ )
- 1.455 (multiplet,  $CH_2$  of  $COOEt$ )
- 12.62, 5.730, 15.79 (aromatic and amide protons)

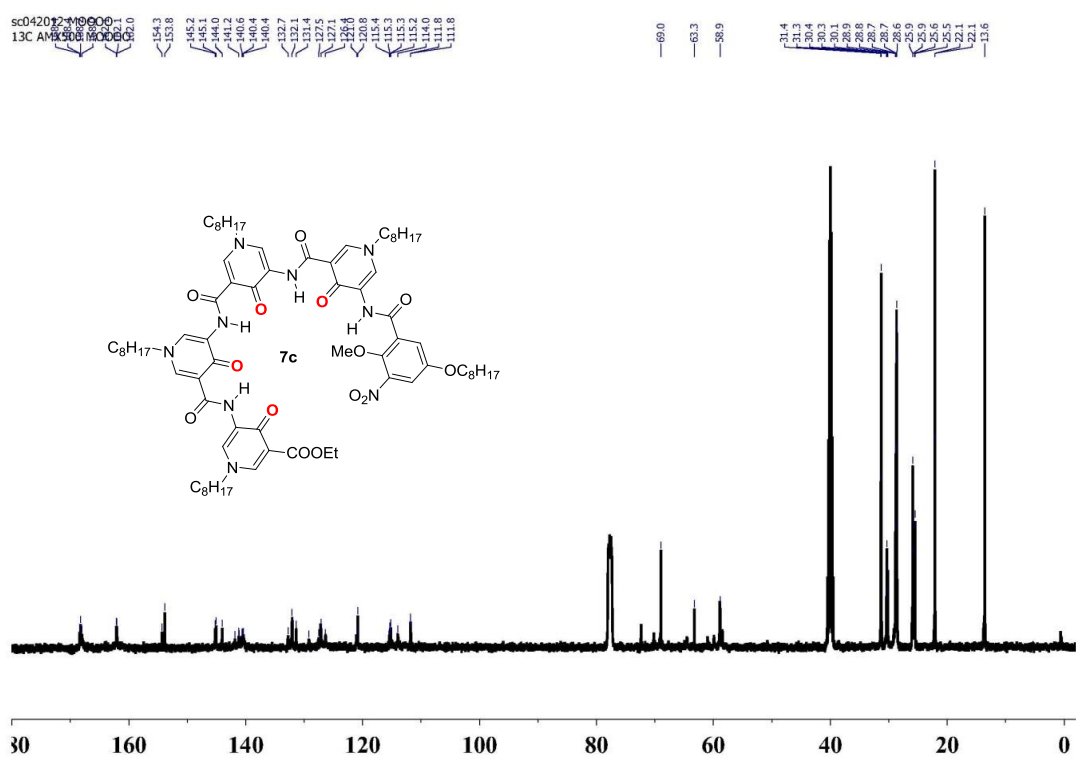

# <sup>1</sup>H and <sup>13</sup>C NMR spectra of 7

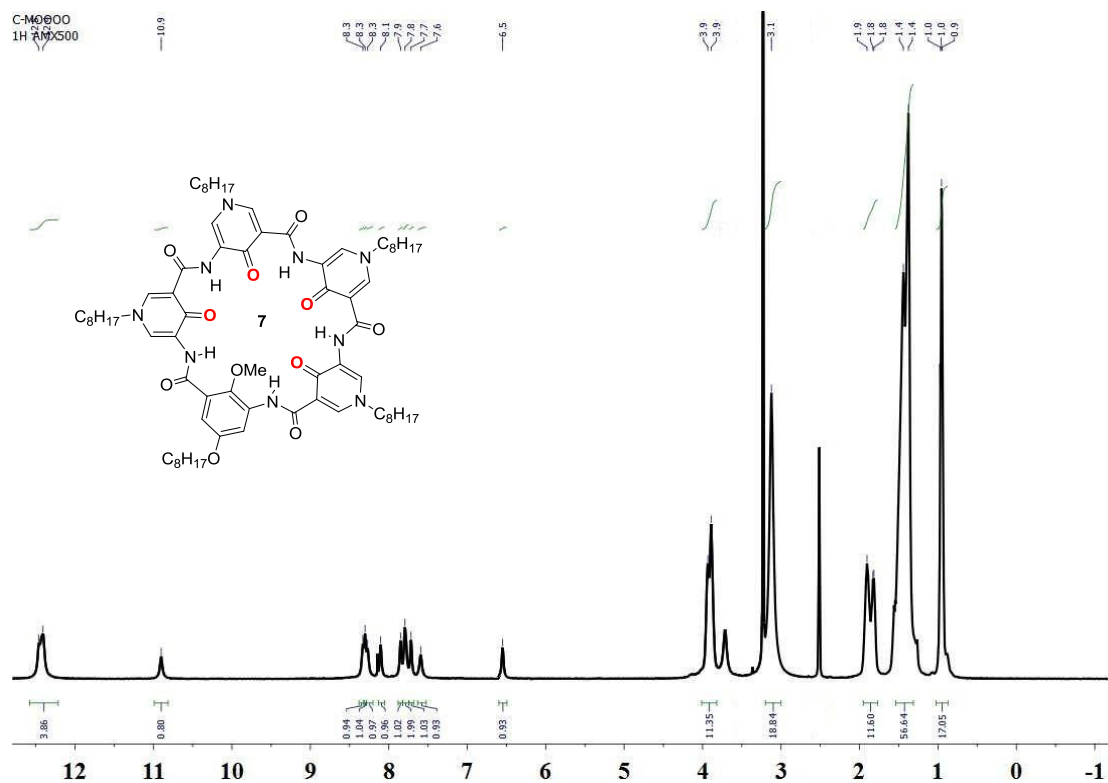

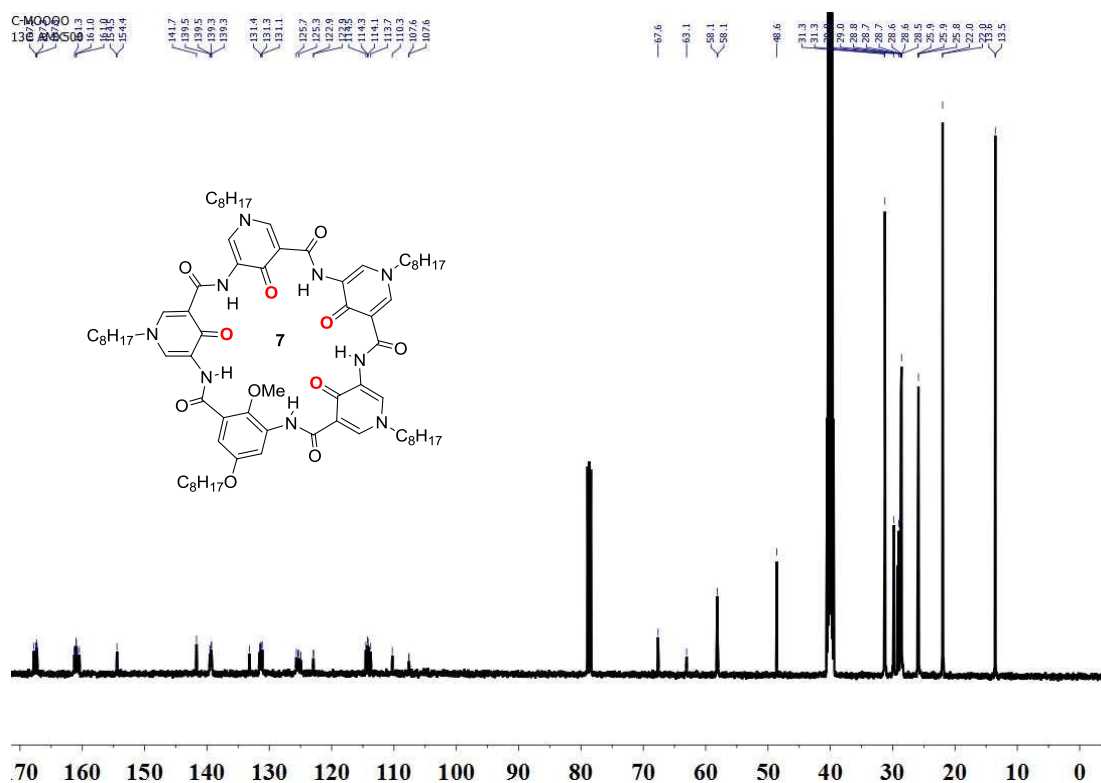

**<sup>1</sup>H and <sup>13</sup>C NMR spectra of 8d**

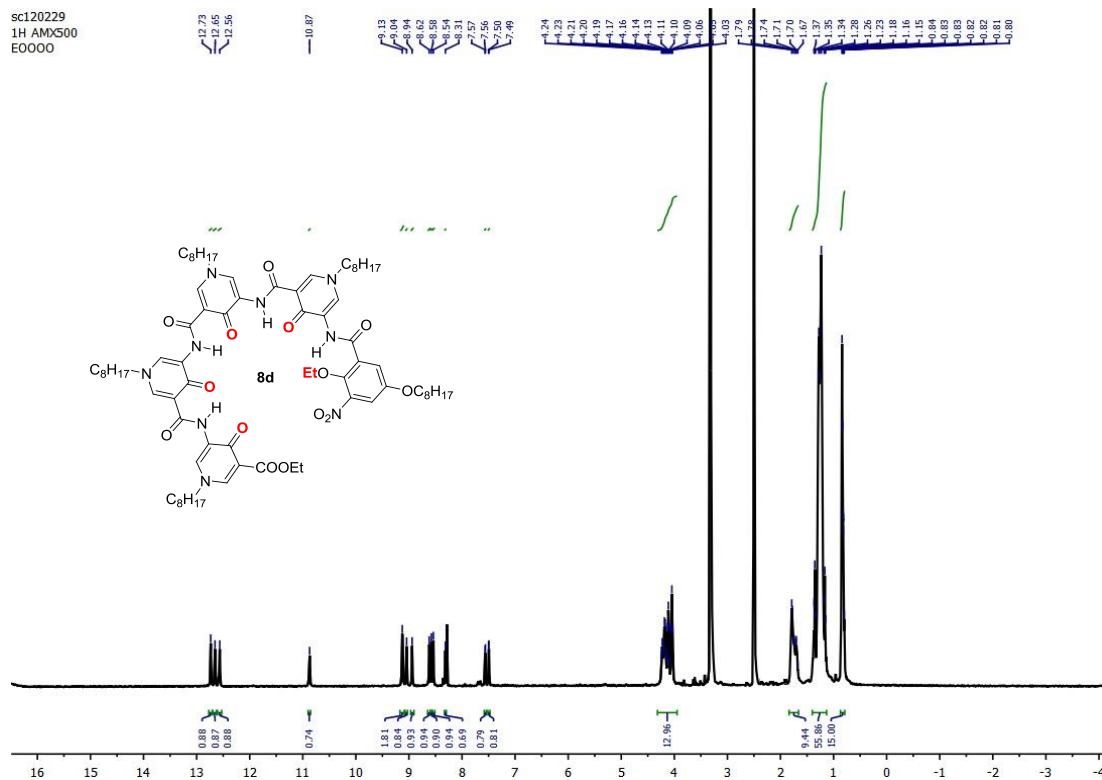

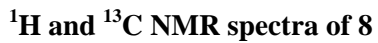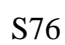

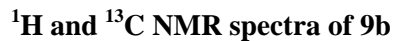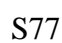



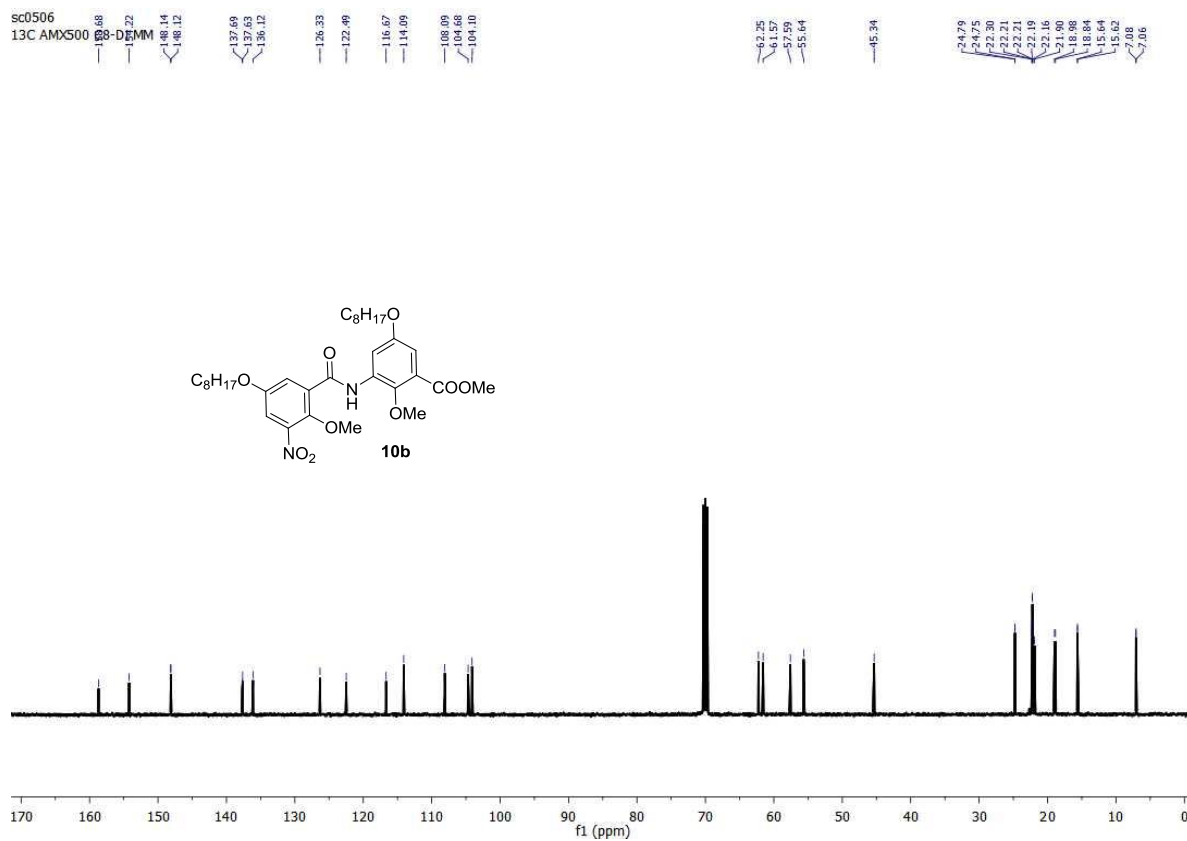

### $^1\text{H}$ and $^{13}\text{C}$ NMR spectra of **10e**

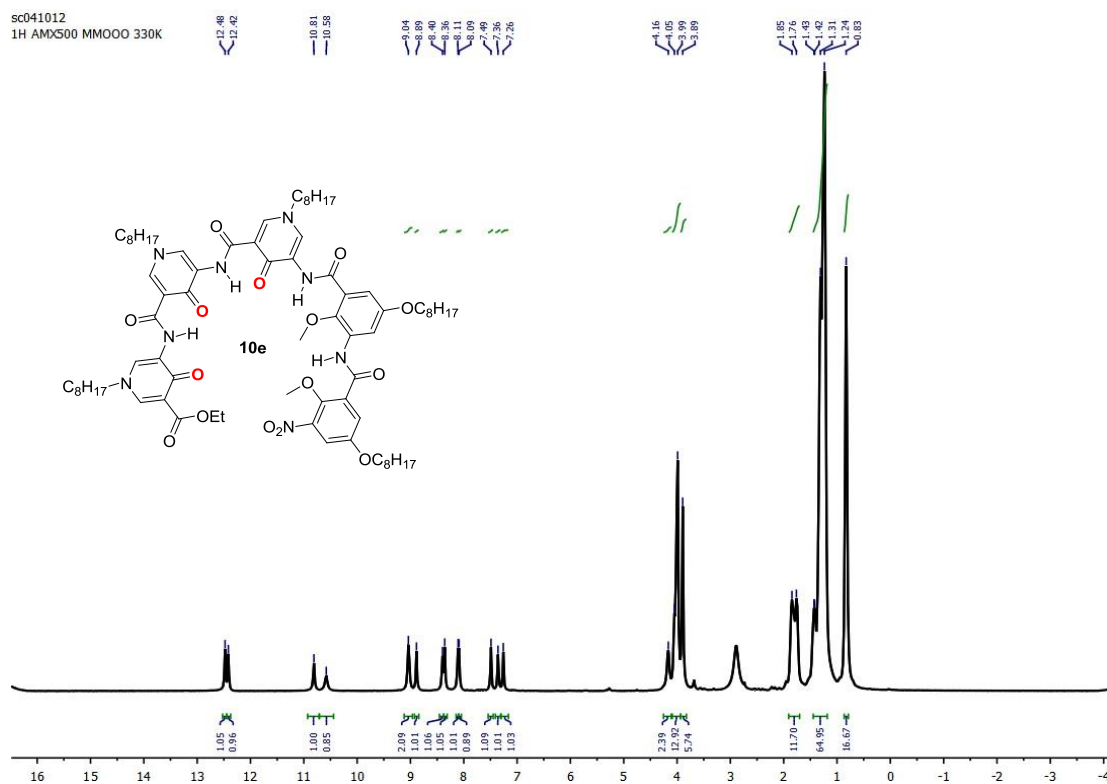

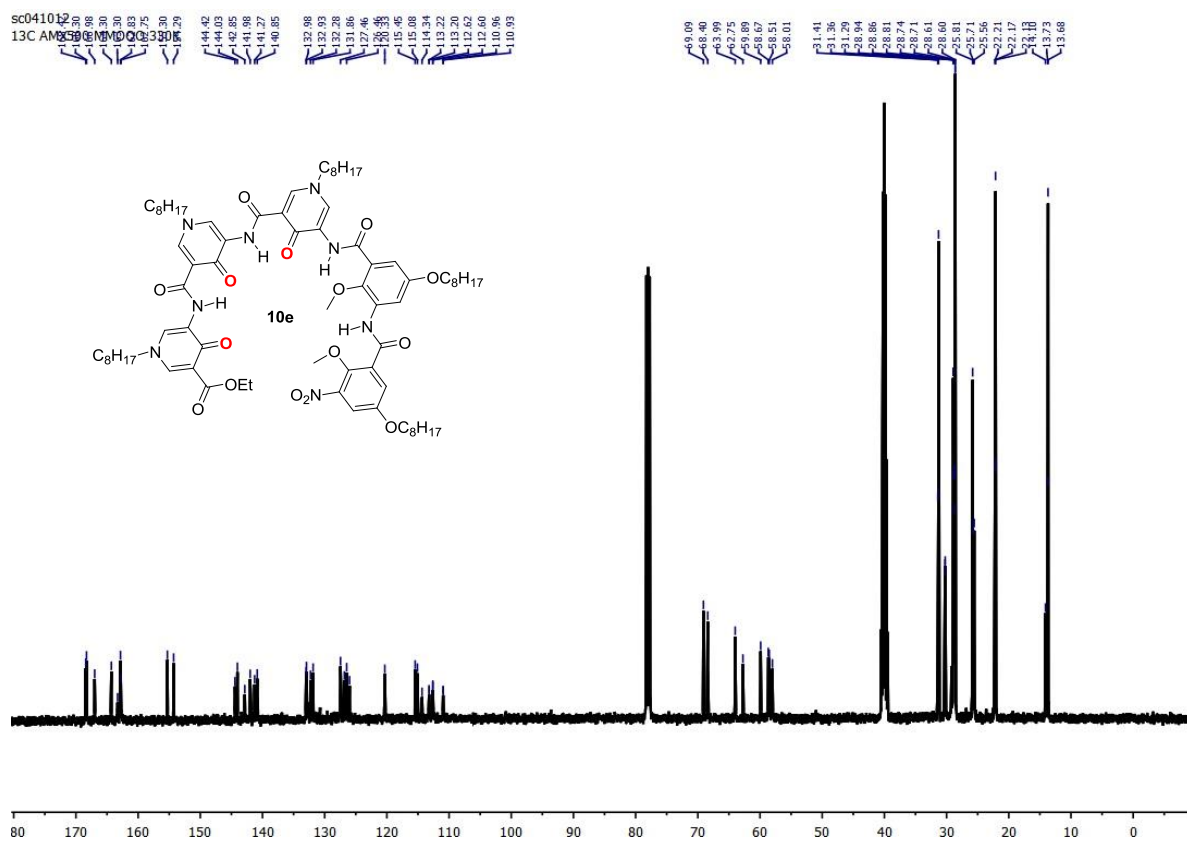

<sup>1</sup>H and <sup>13</sup>C NMR spectra of 10

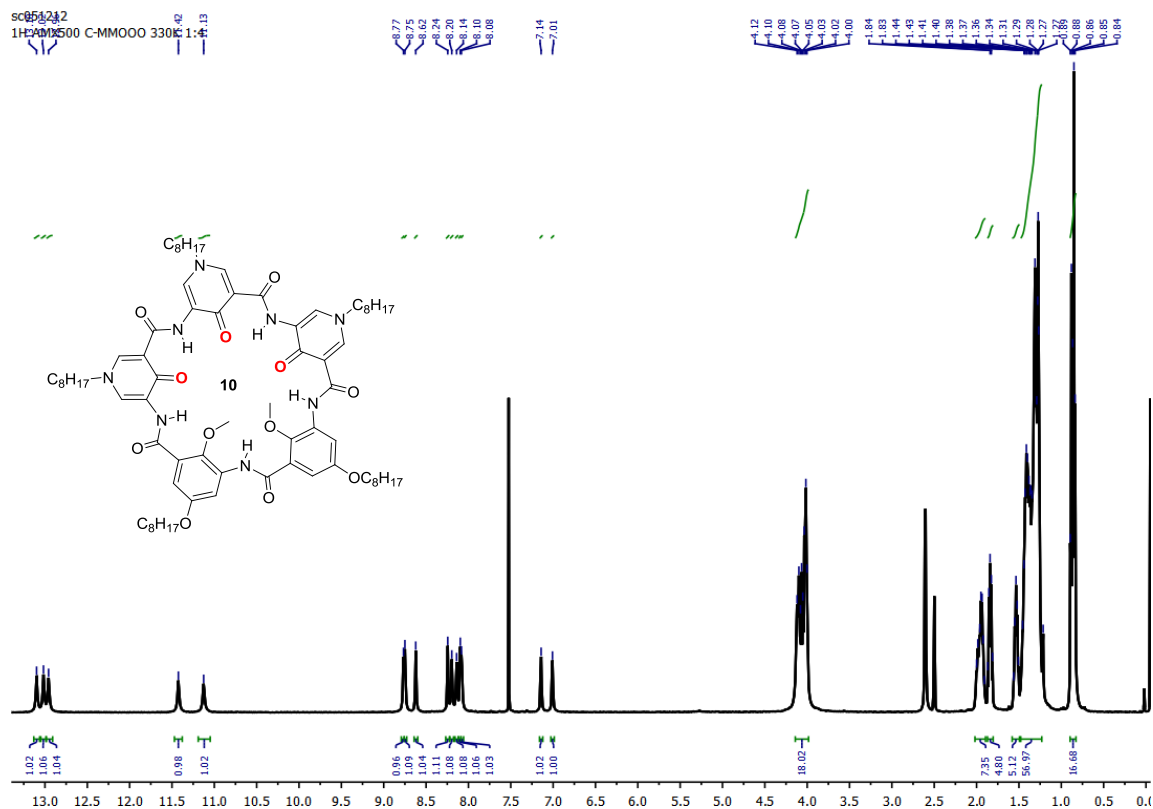





sc0308  
13C AMX500 MOM

168.99  
166.12  
162.43  
161.49  
154.91  
154.81  
146.16  
144.67  
143.55  
141.23  
134.24  
131.61  
128.59  
127.29  
124.82  
121.03  
116.24  
115.07  
111.31  
110.85

69.49  
68.42  
64.20  
62.27  
59.26  
52.18  
31.75  
31.71  
31.59  
29.29  
29.21  
29.19  
28.93  
26.15  
25.96  
25.61  
22.60  
14.03  
13.96

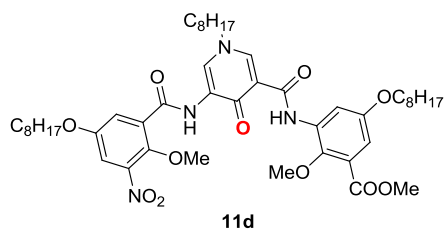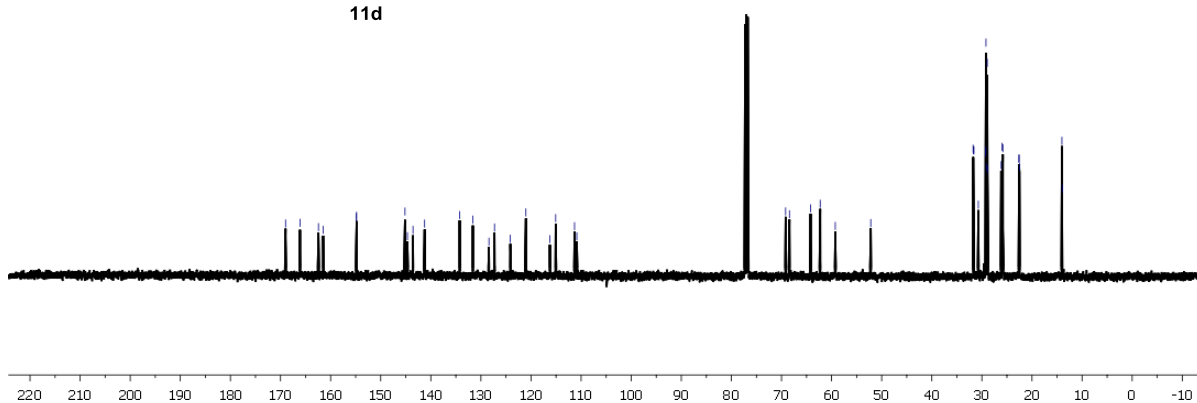

## <sup>1</sup>H and <sup>13</sup>C NMR spectra of 11e

sc1123  
1H AMX500 MOM acid

11.08

9.01  
8.91  
8.49  
8.46  
8.45  
7.90  
7.50  
7.50  
7.08  
7.08

1.94  
1.93  
1.91  
1.90  
1.88  
1.84  
1.82  
1.81  
1.79  
1.77  
1.76  
1.74  
1.62  
1.46  
1.46  
1.45  
1.44  
1.42  
1.35  
1.31  
1.31  
1.29  
1.28  
1.25  
0.90  
0.89  
0.89  
0.88  
0.88  
0.87  
0.86

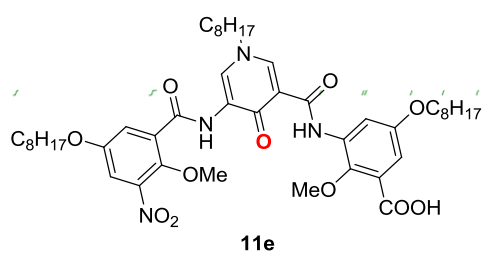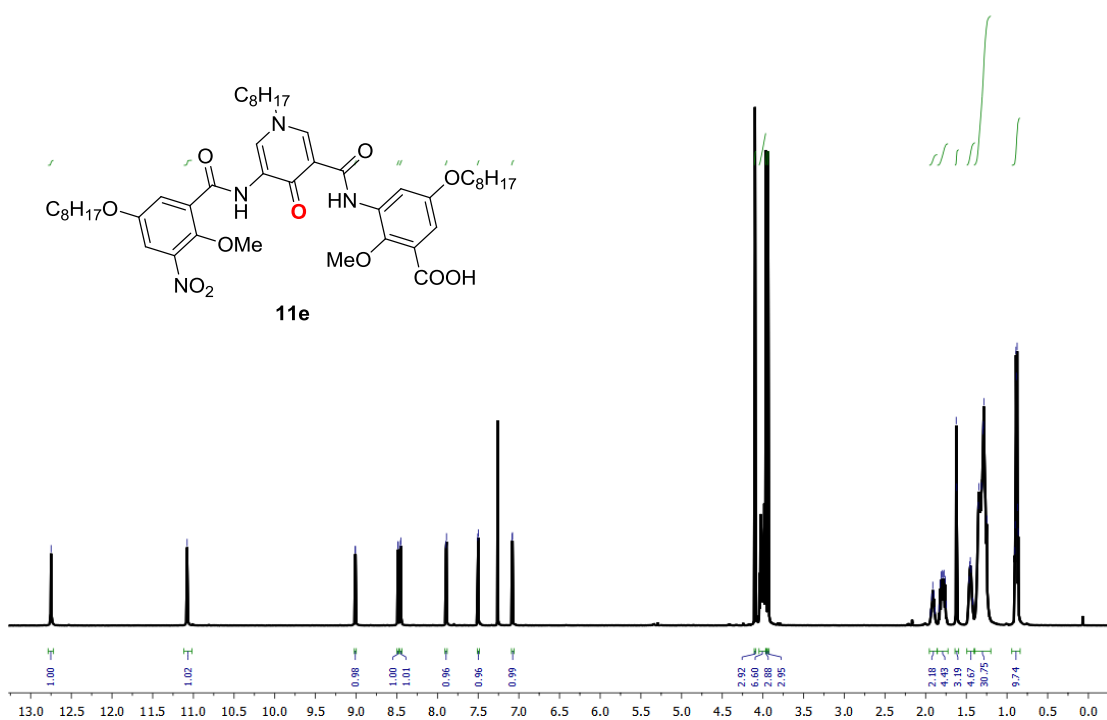

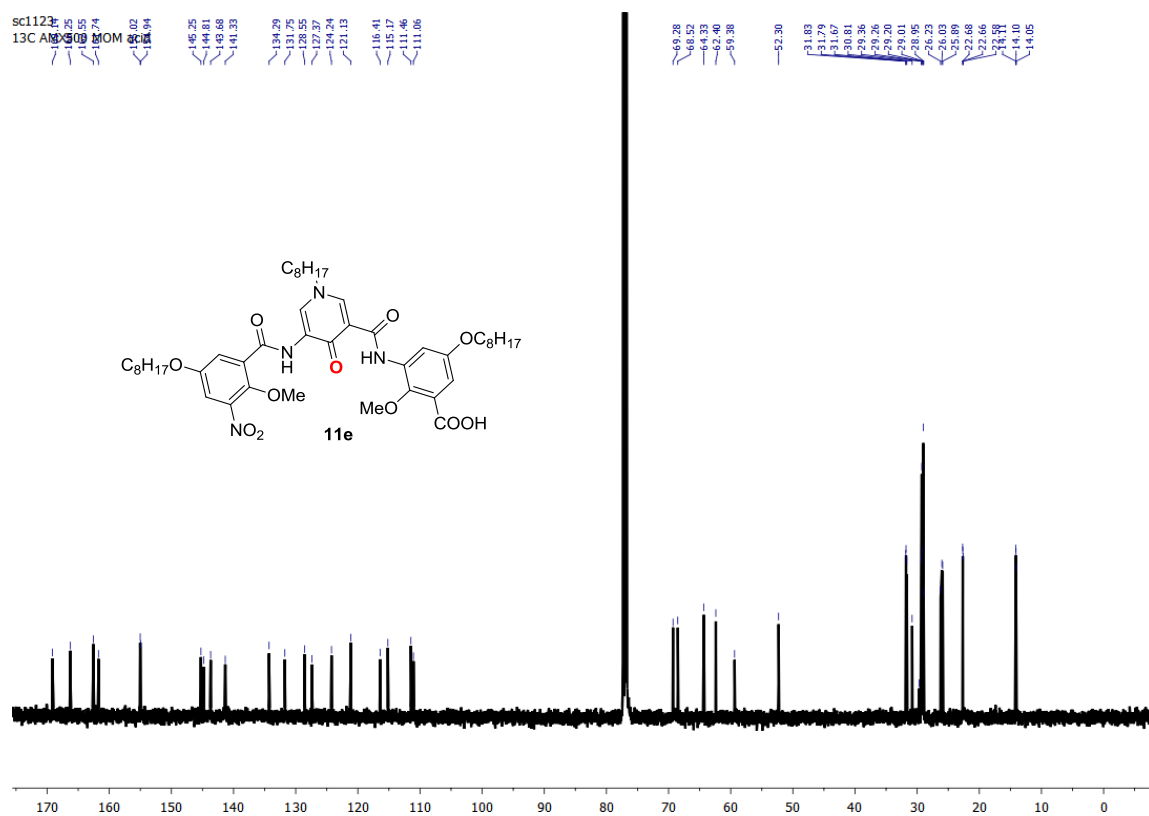

$^1\text{H}$  and  $^{13}\text{C}$  NMR spectra of 11g

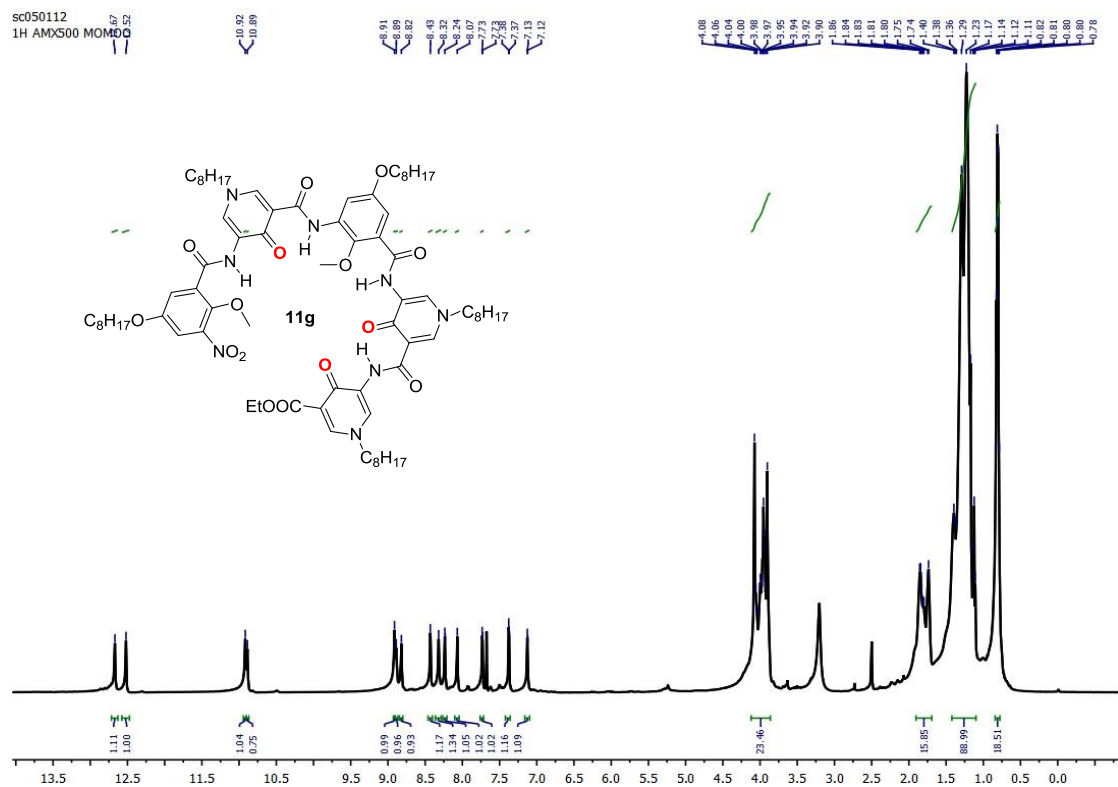

sc050112  
13C AMX500 MOMOO

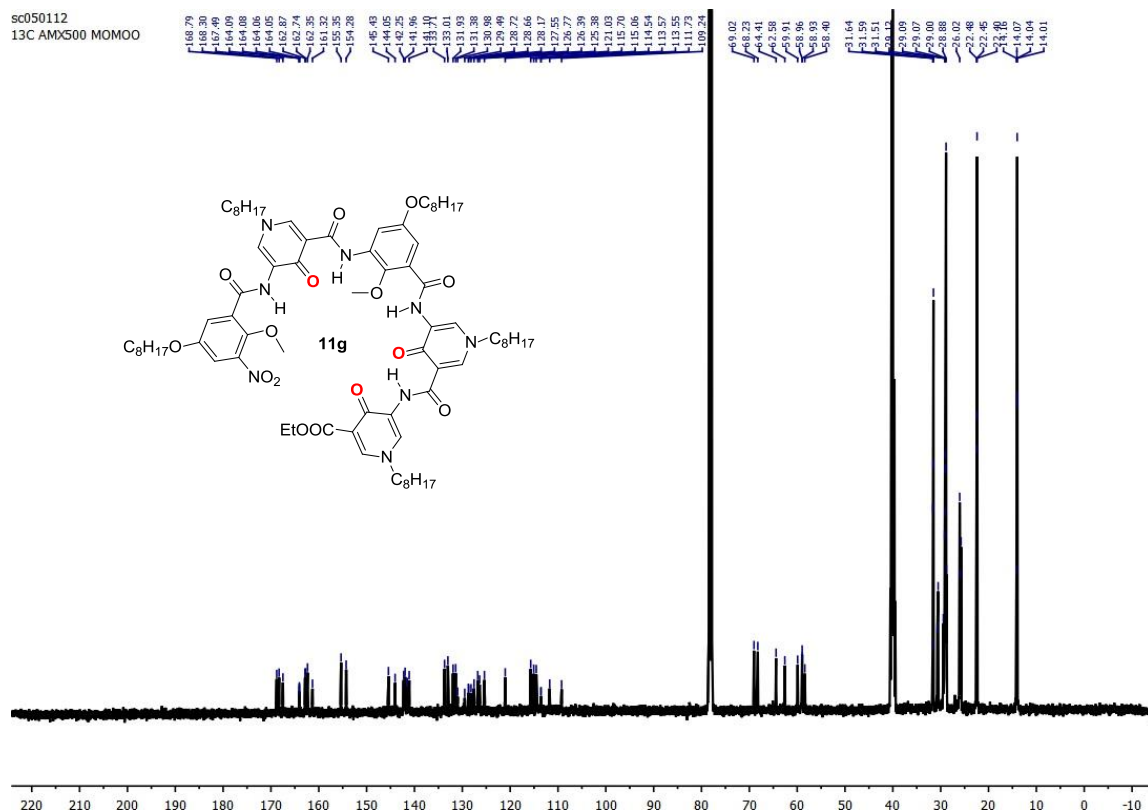

<sup>1</sup>H and <sup>13</sup>C NMR spectra of 11

sc109992  
1H AMX500 C-MOMOO2 8:1:330K

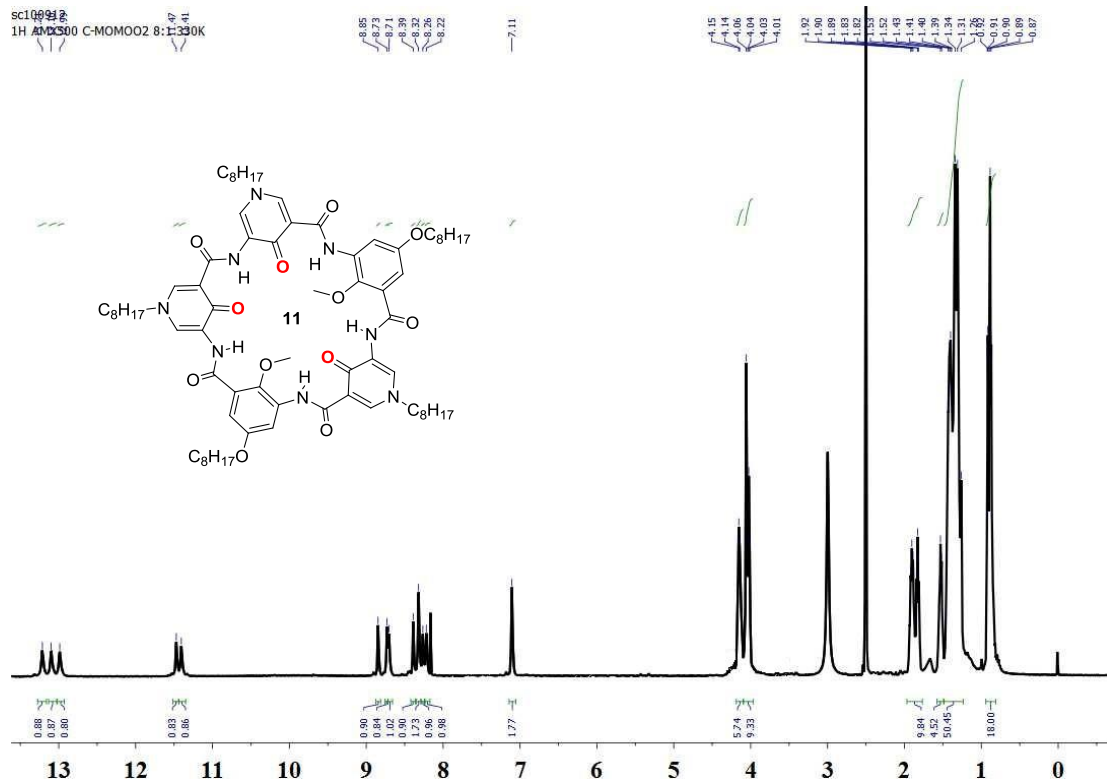





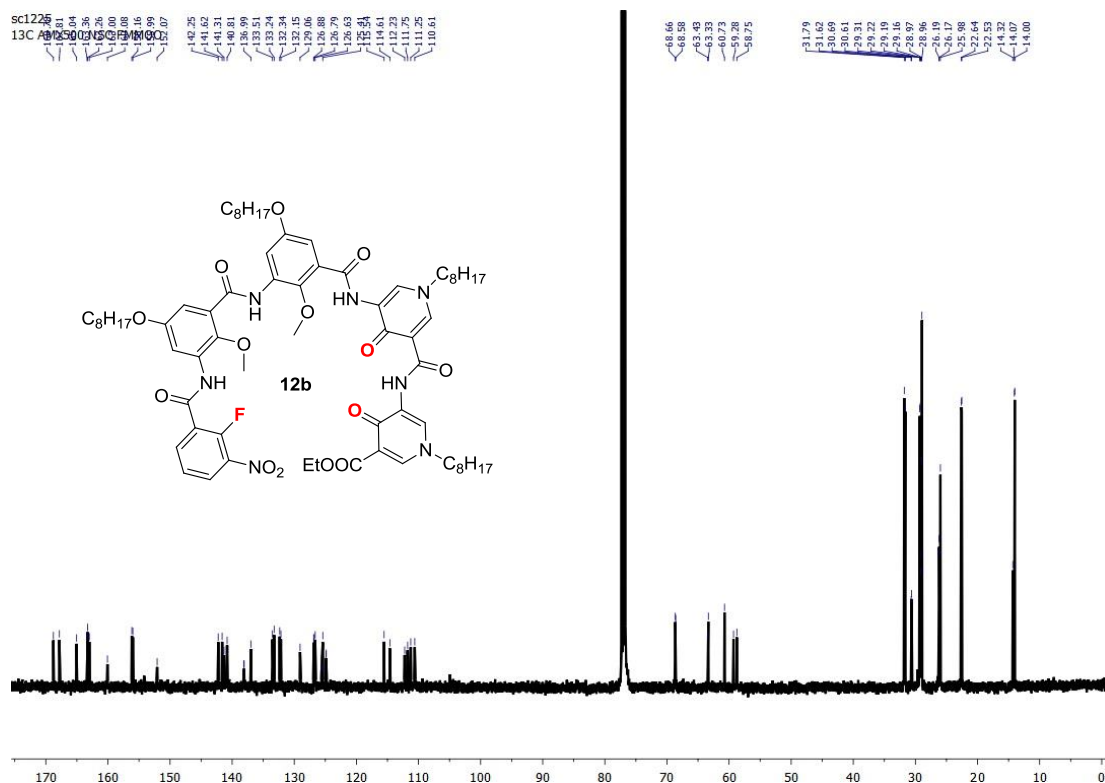

<sup>1</sup>H and <sup>13</sup>C NMR spectra of **12**

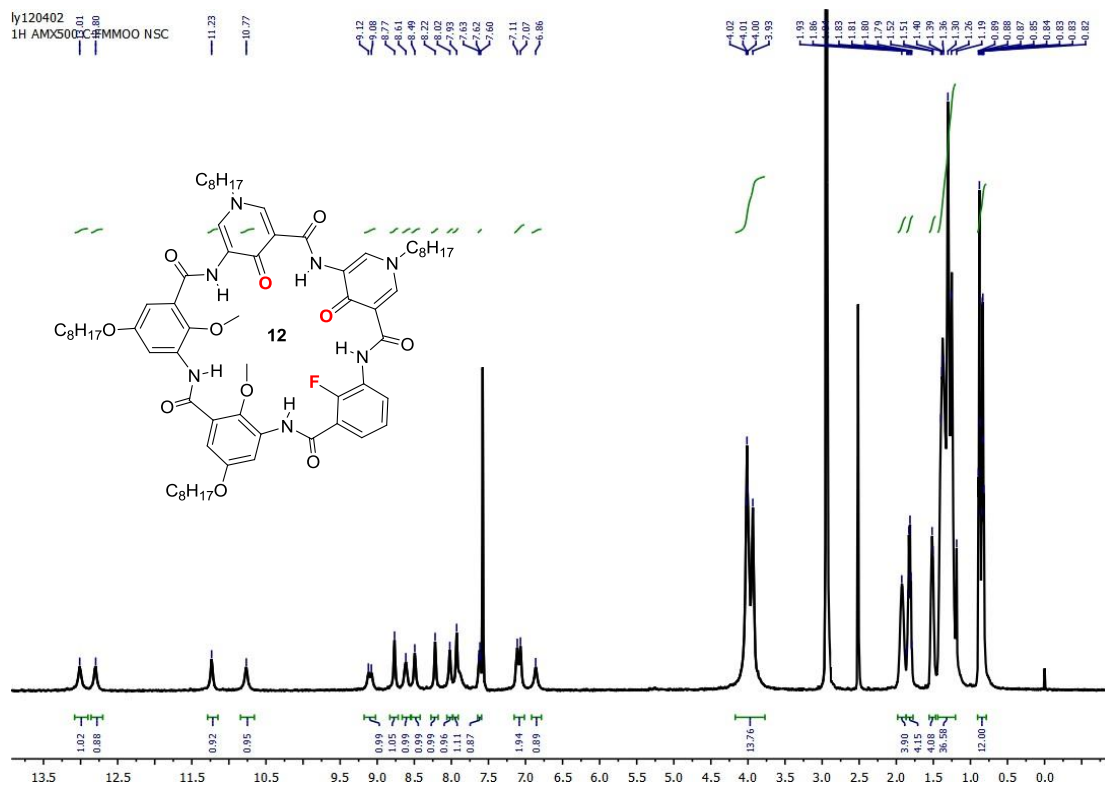





sc0705  
13C AMX500 MOMO

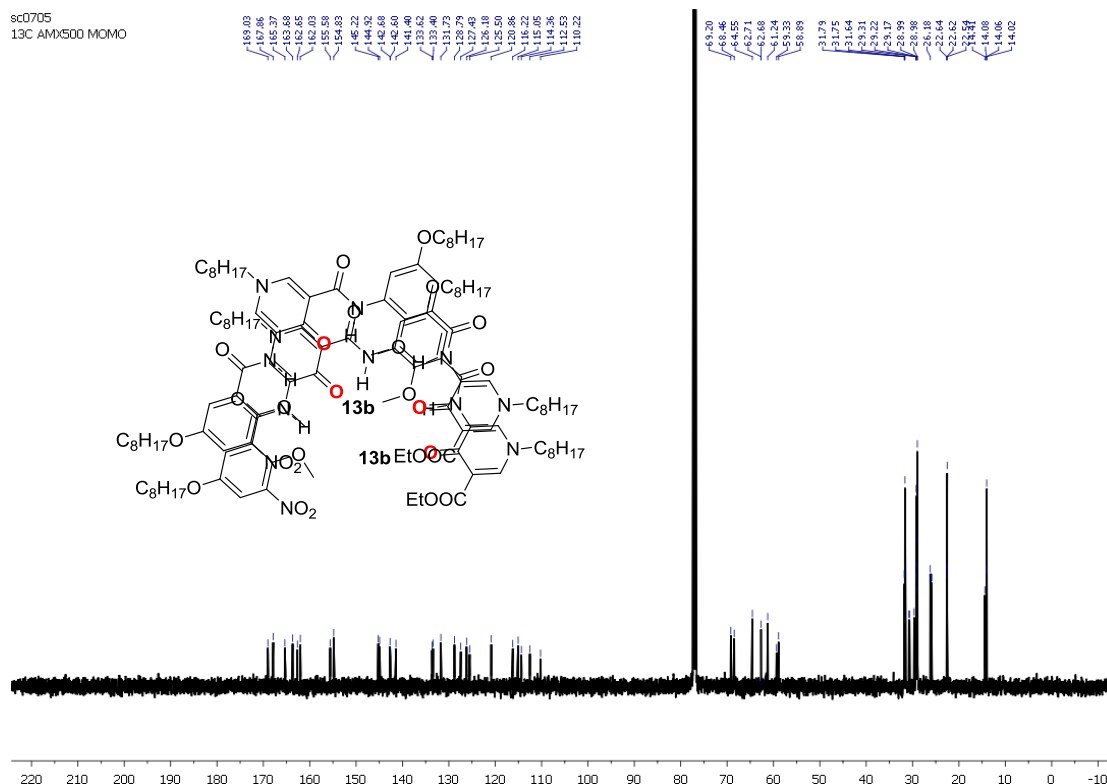

<sup>1</sup>H and <sup>13</sup>C NMR spectra of 13c

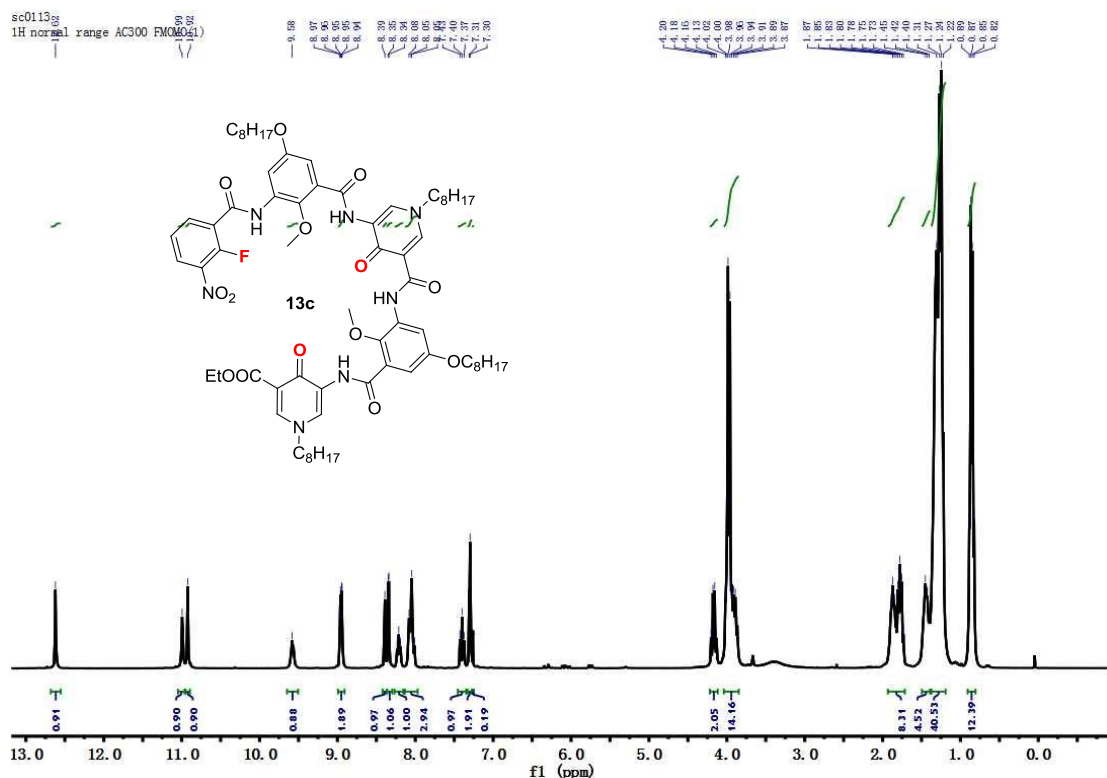

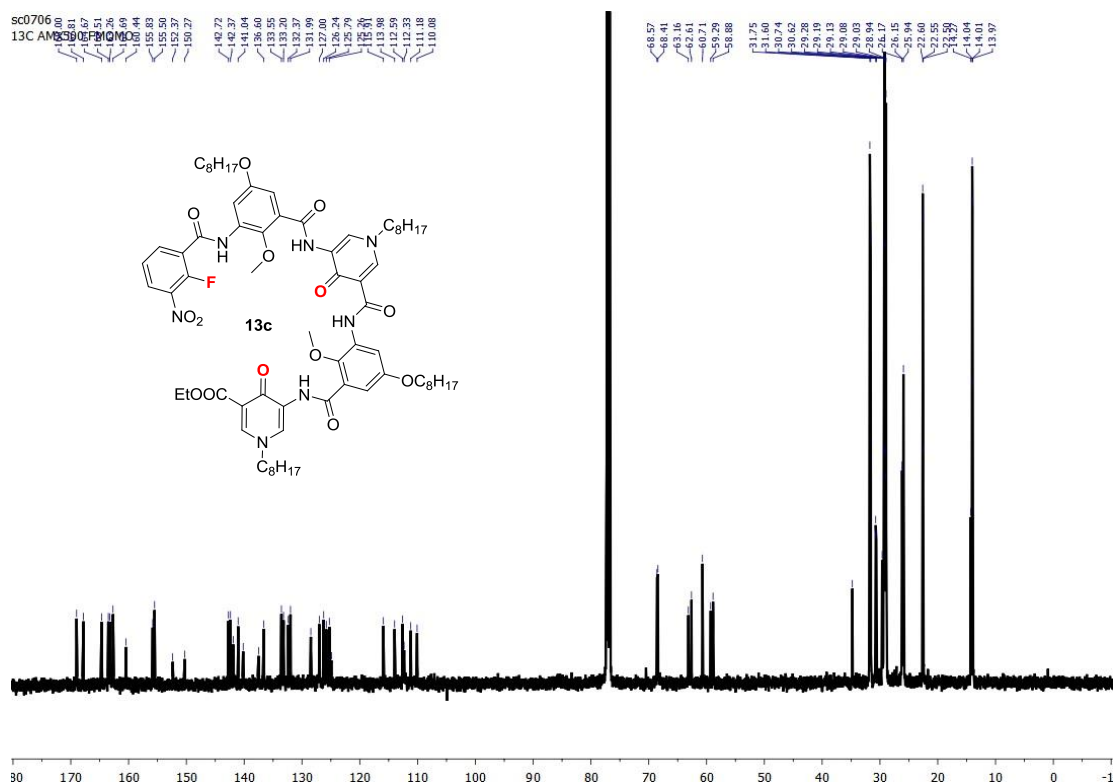

<sup>1</sup>H and <sup>13</sup>C NMR spectra of 13

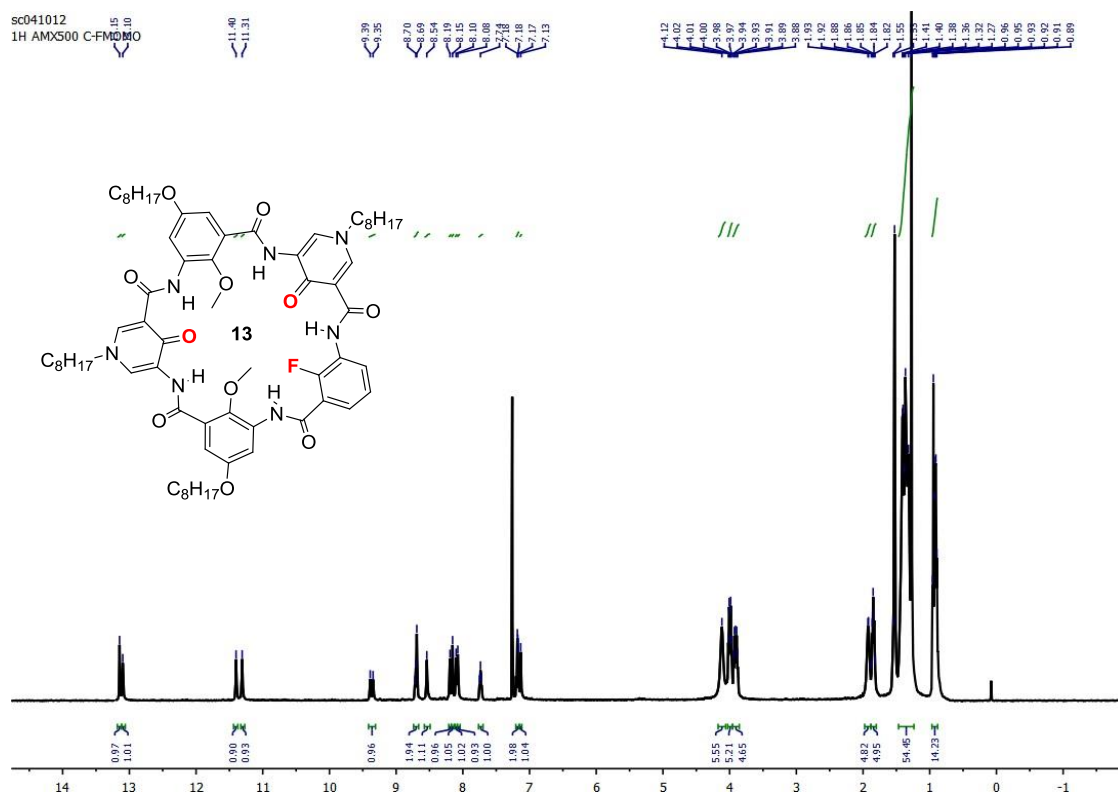

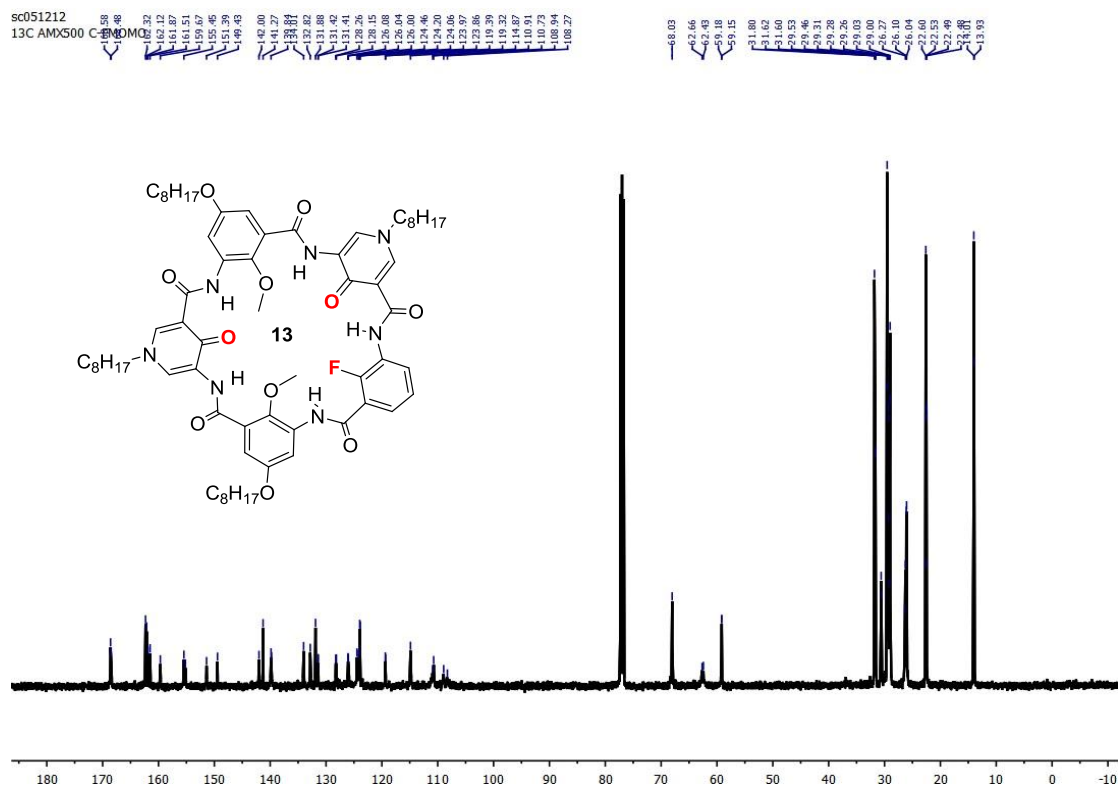

$^1\text{H}$  and  $^{13}\text{C}$  NMR spectra of 16e

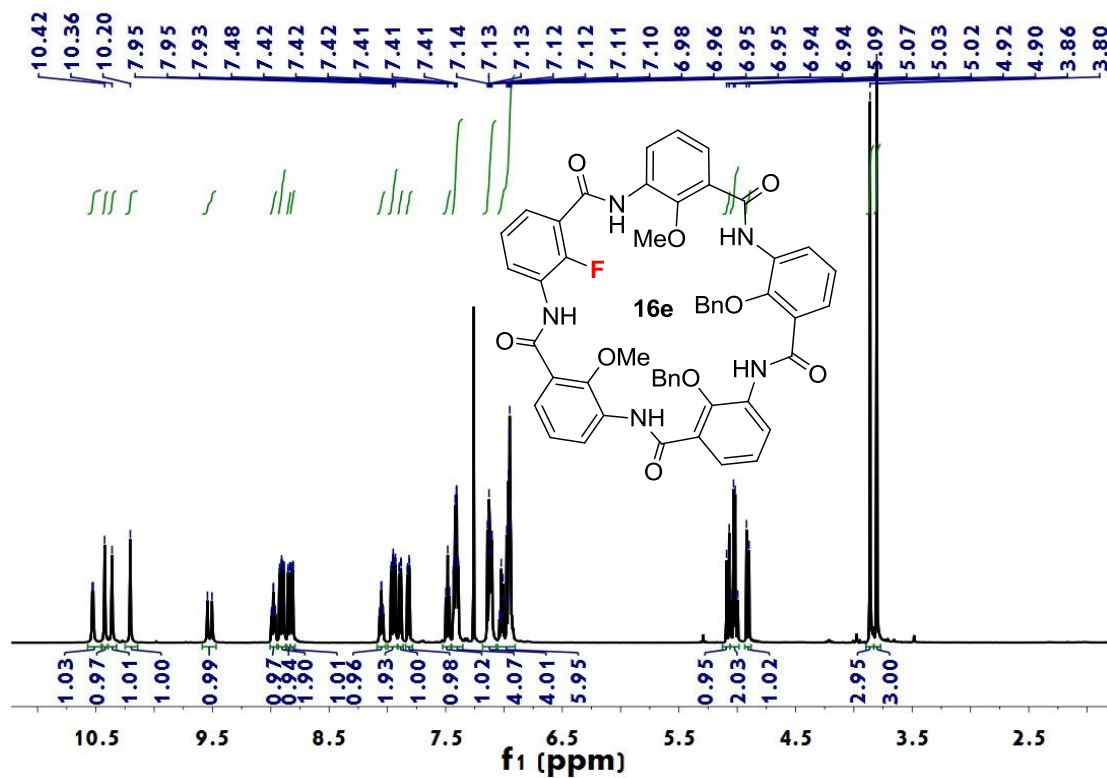

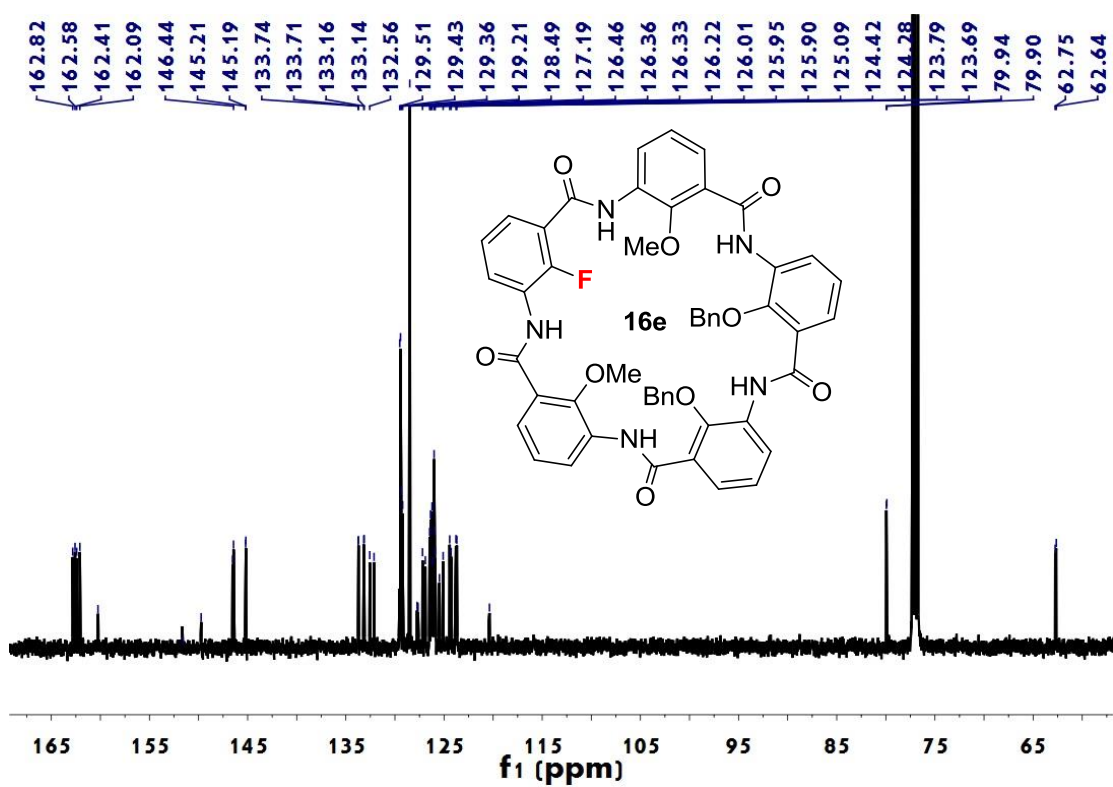

<sup>1</sup>H and <sup>13</sup>C NMR spectra of 16

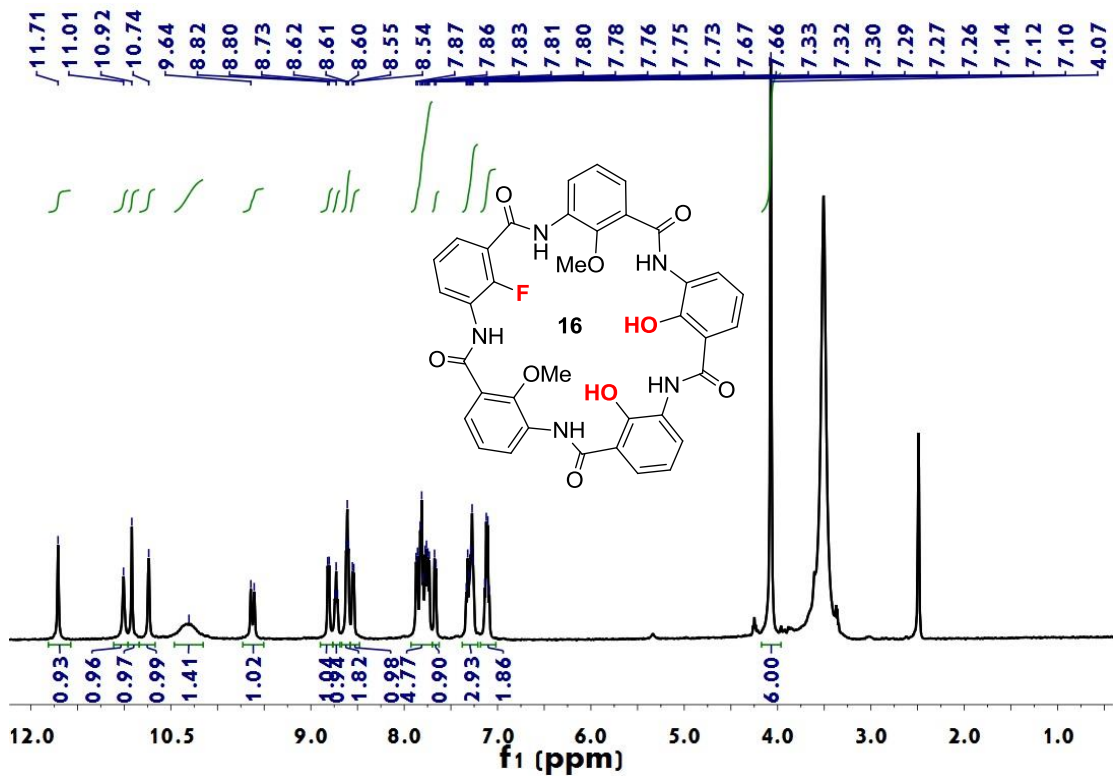

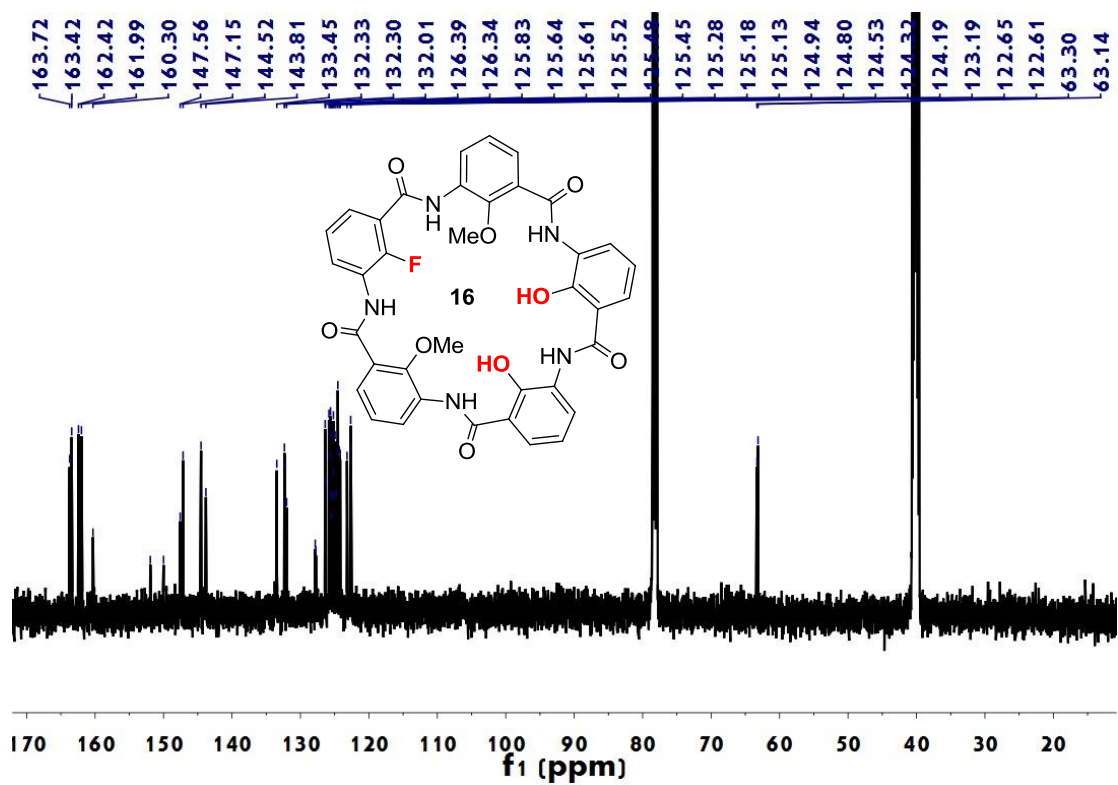

<sup>1</sup>H and <sup>13</sup>C NMR spectra of 17d

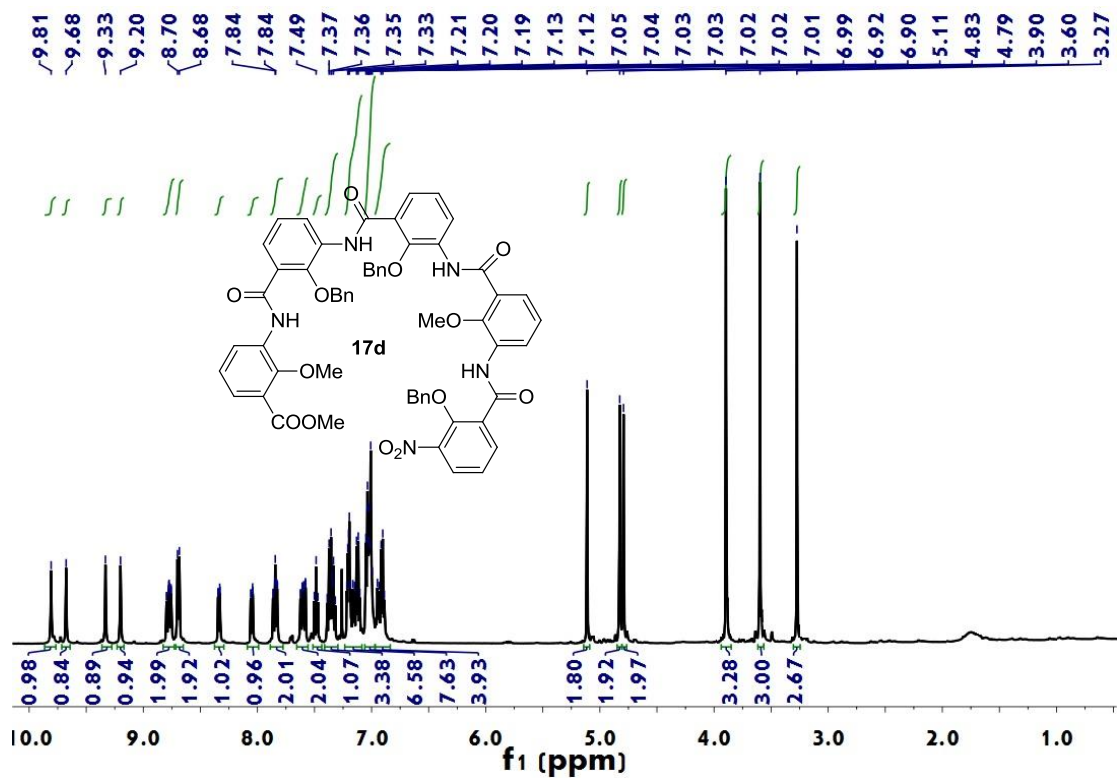

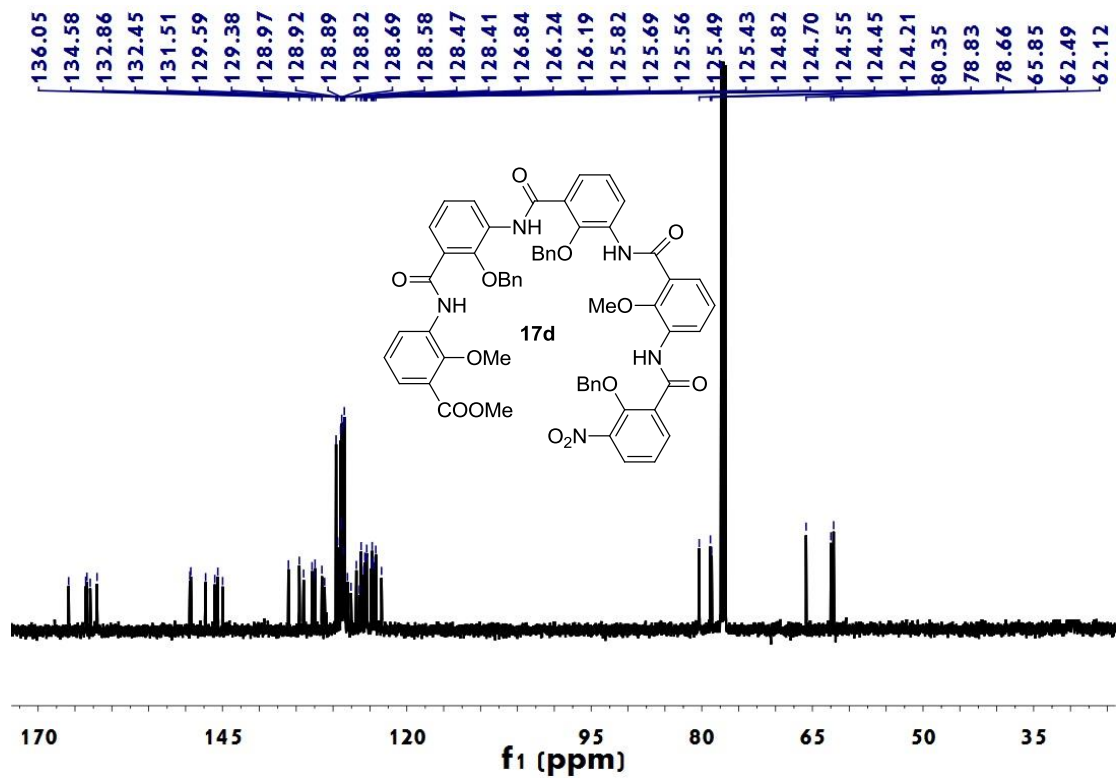

<sup>1</sup>H and <sup>13</sup>C NMR spectra of 17e

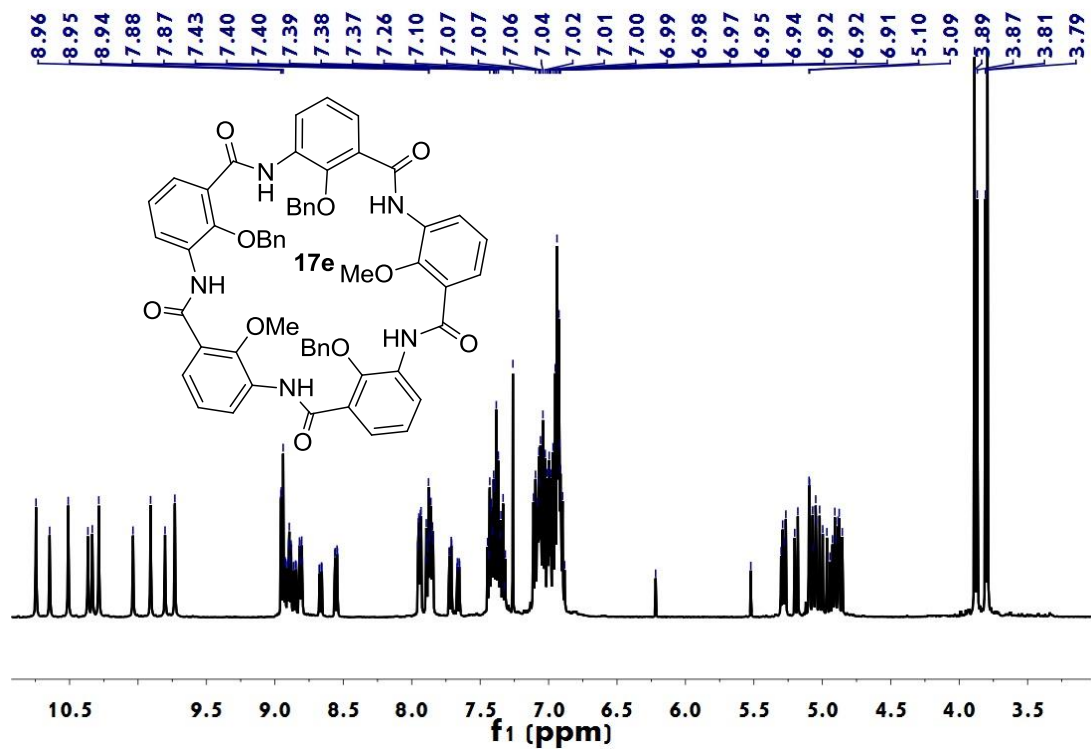

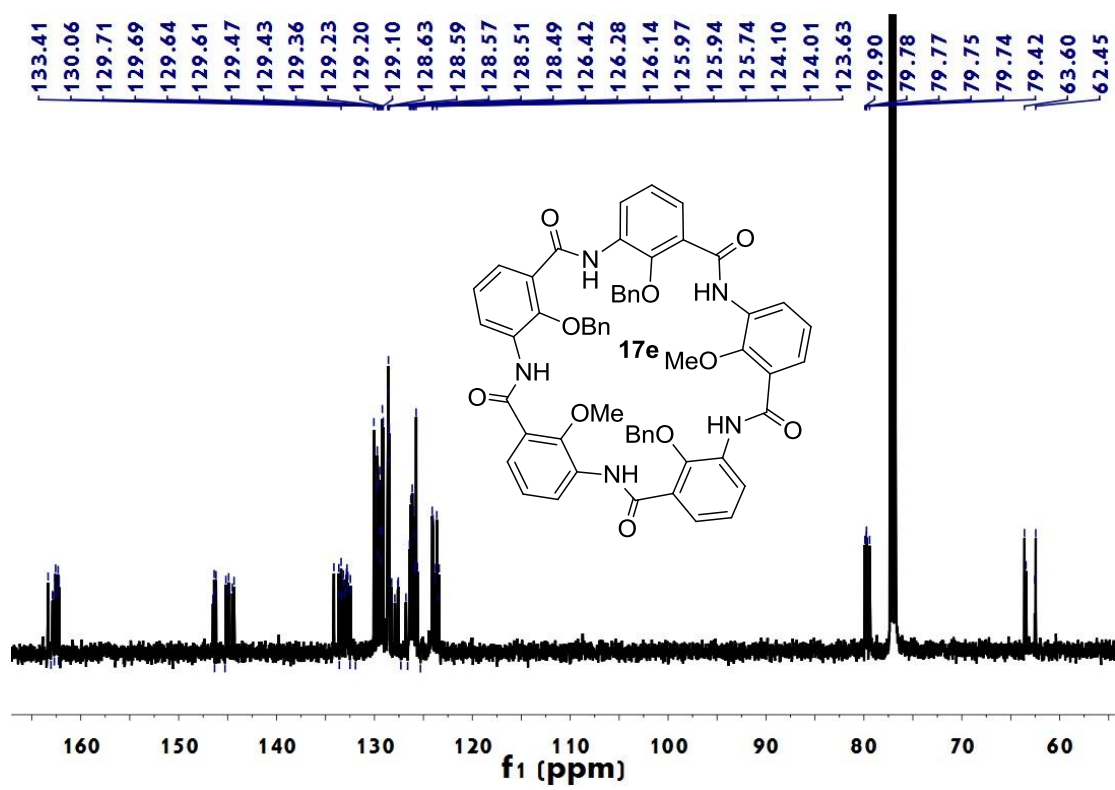

$^1\text{H}$  spectrum of 17





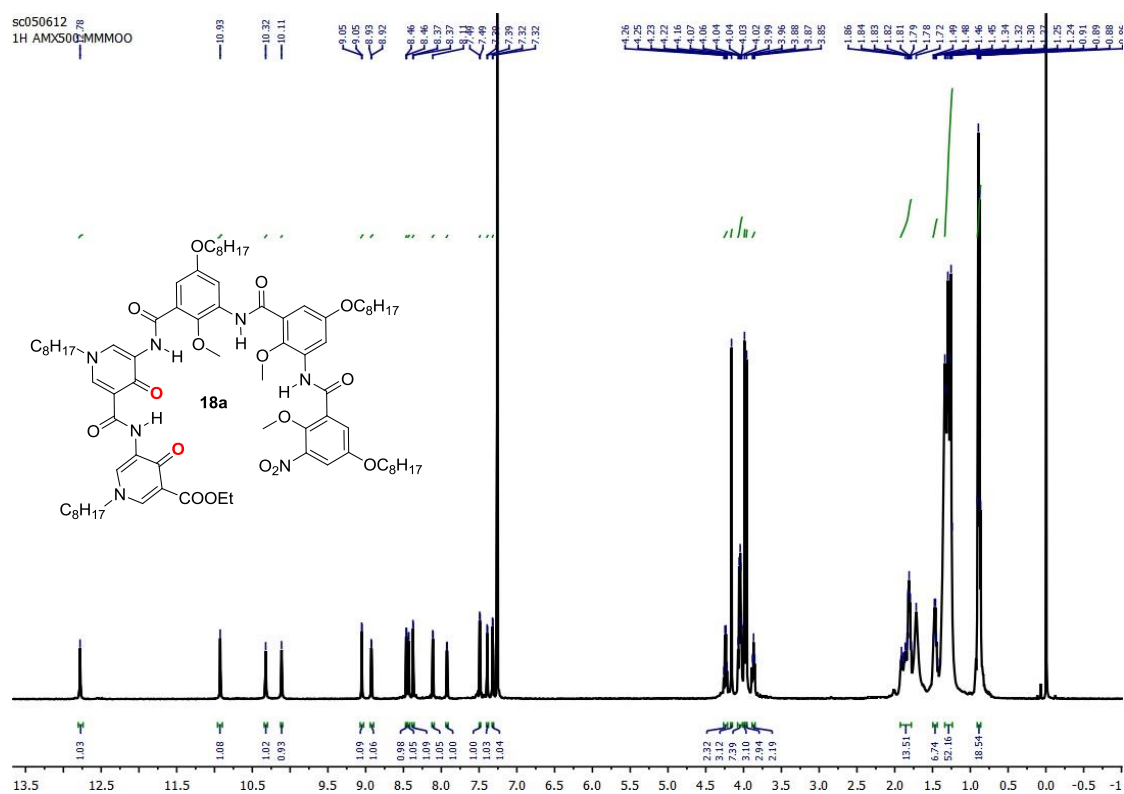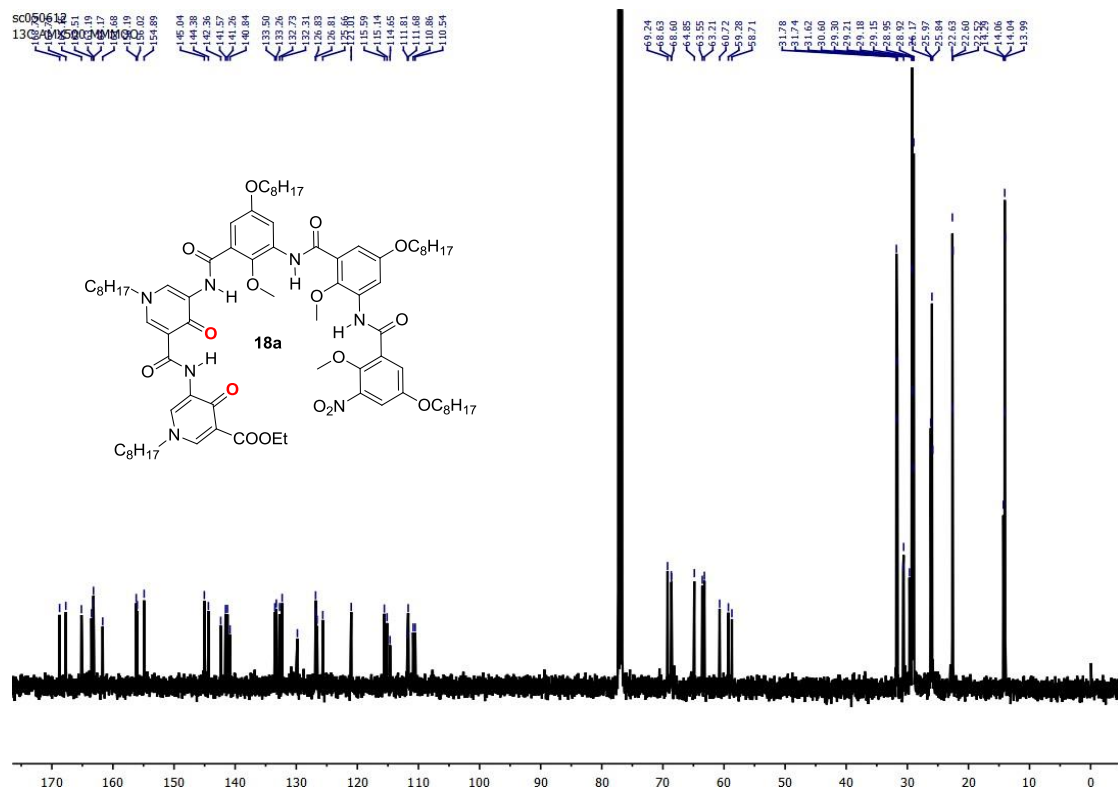

<sup>1</sup>H and <sup>13</sup>C NMR spectra of **18**

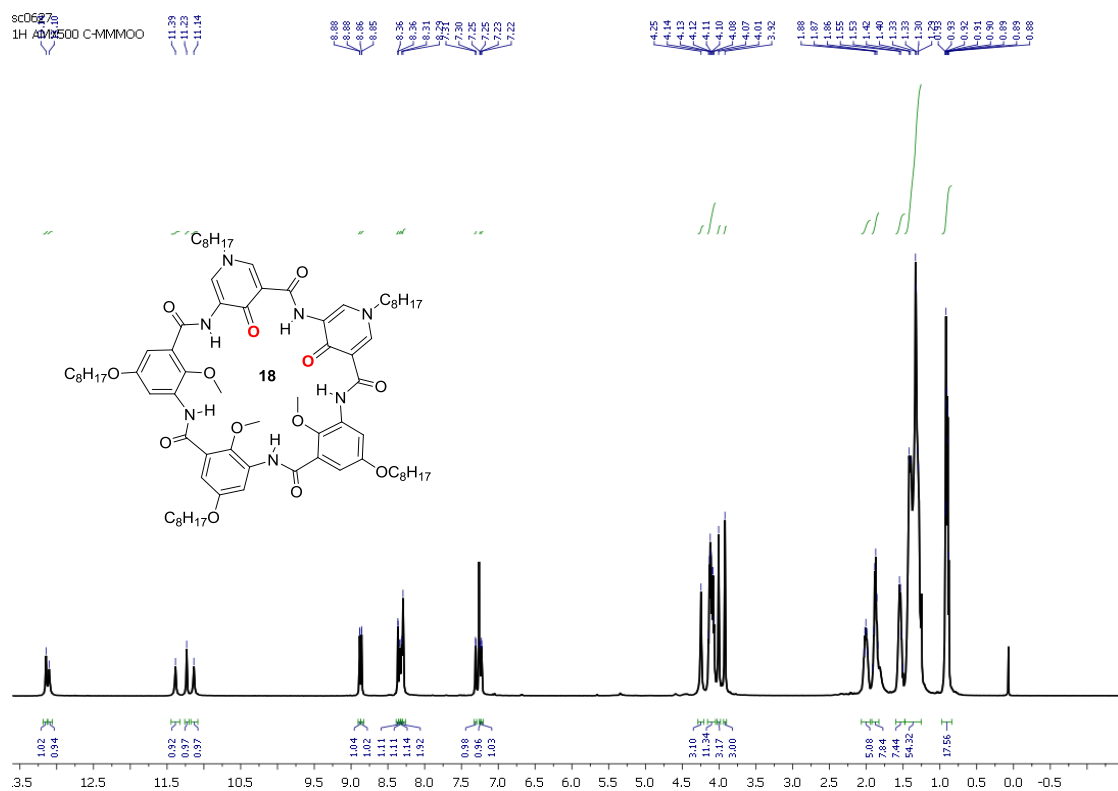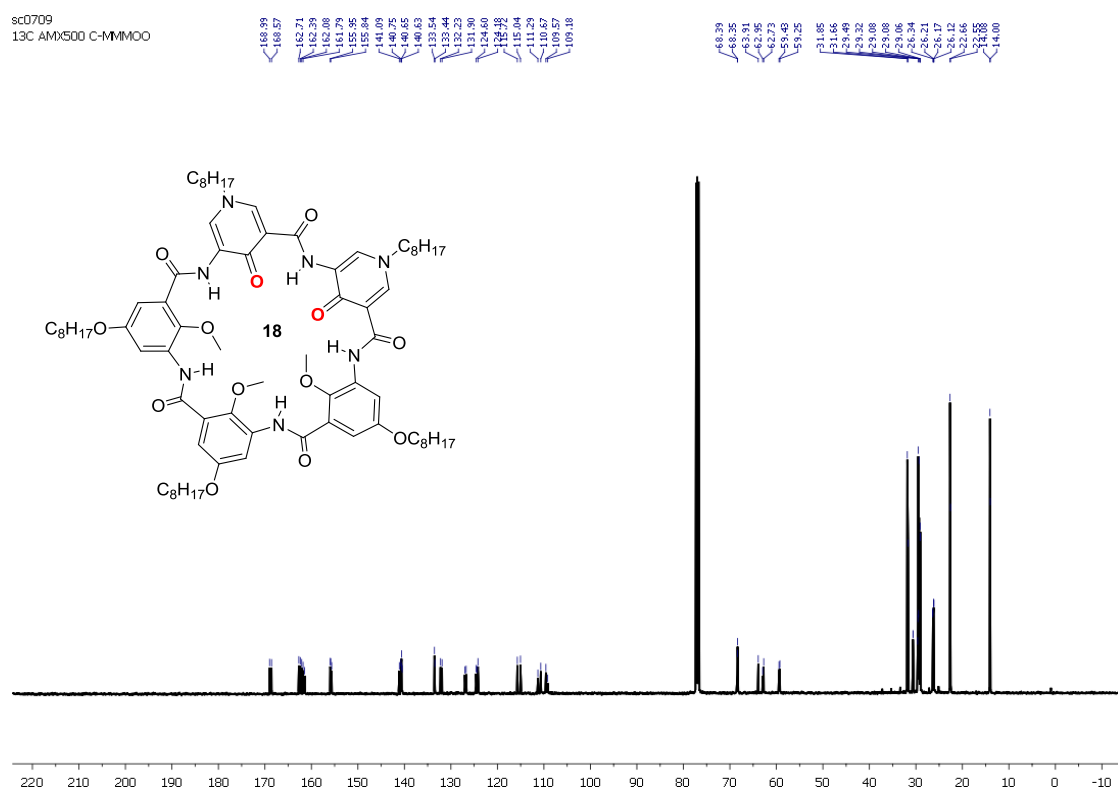

**H and <sup>13</sup>C NMR spectra of 19a**

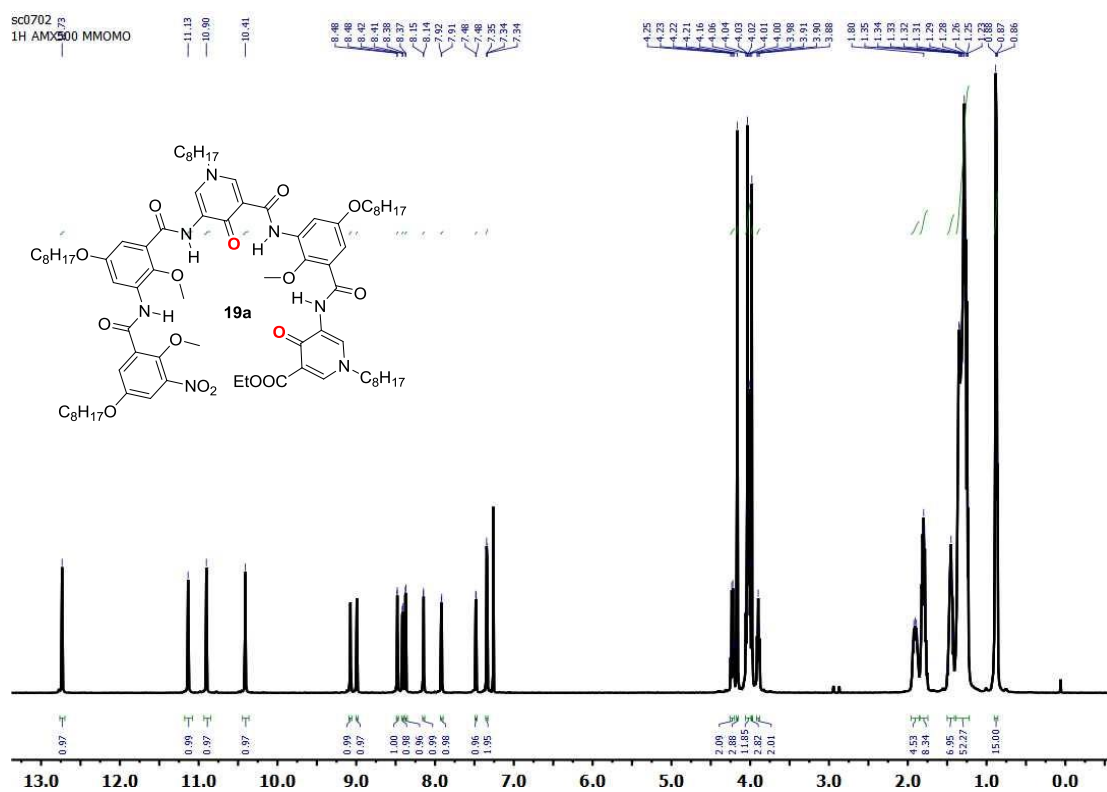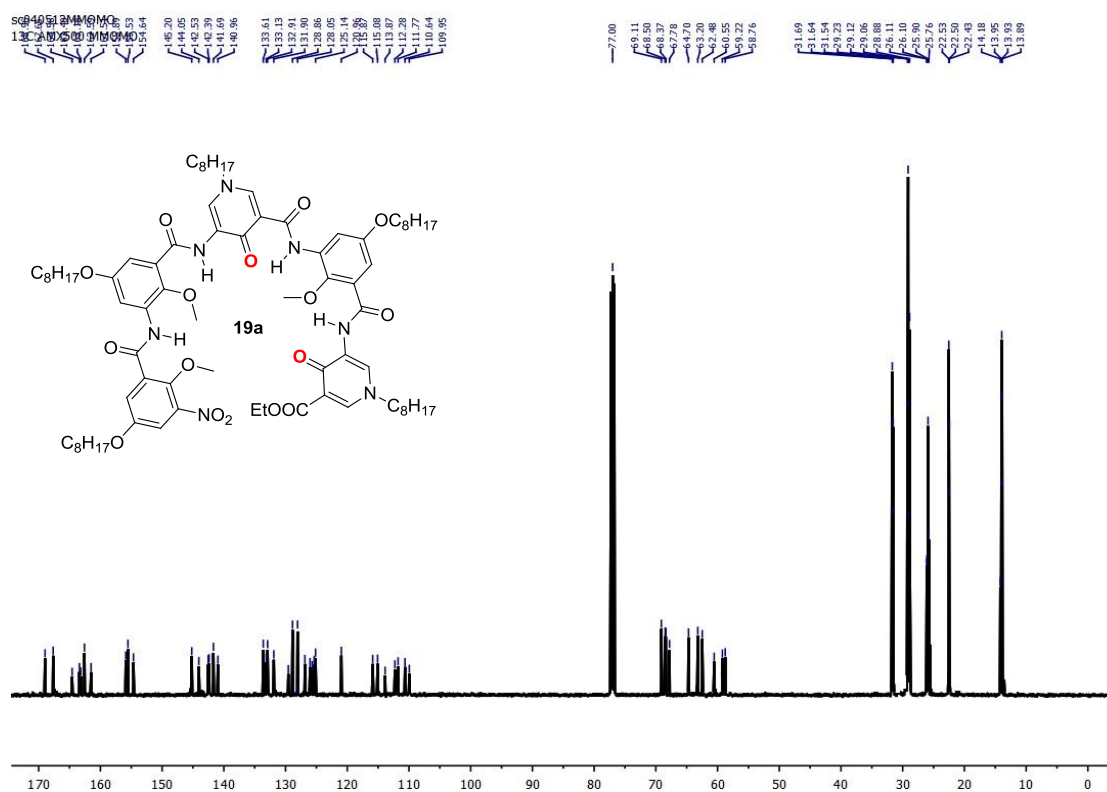



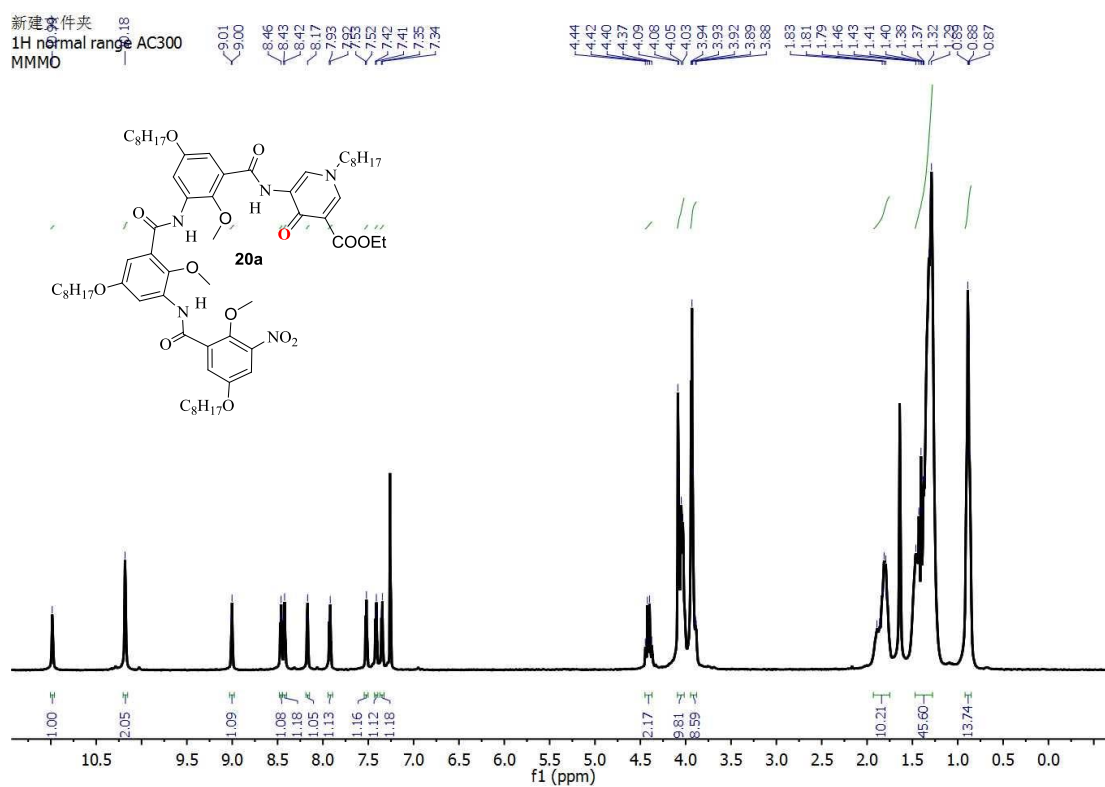

**<sup>1</sup>H and <sup>13</sup>C NMR spectra of 20c**



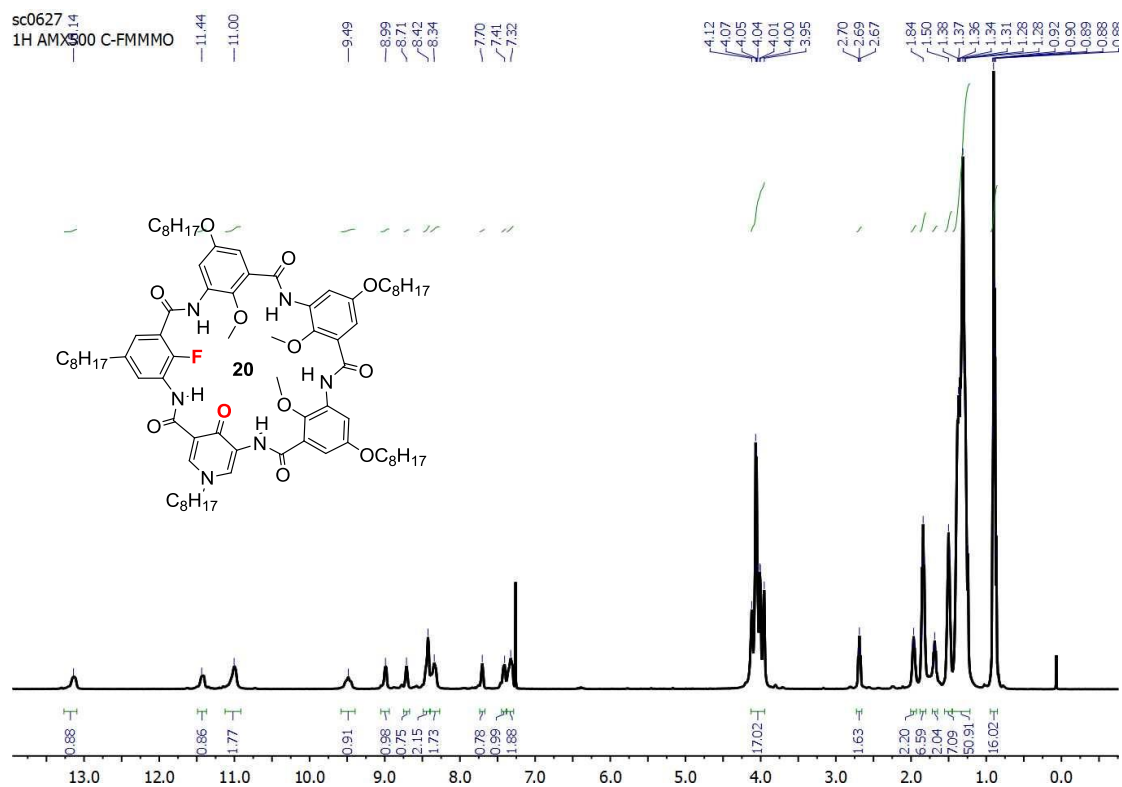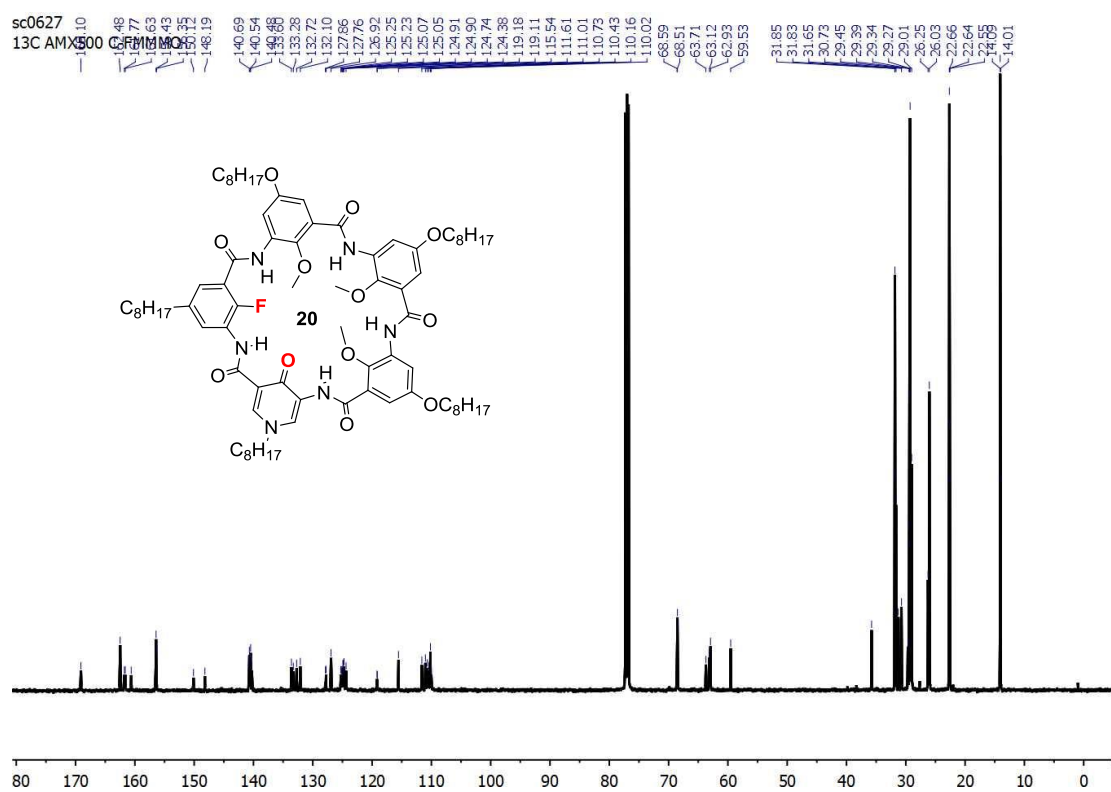

Supplement: Supplementary file 1 [file 3762532]
